# Supplementary material for: Viruses Infecting Trees and Herbs That Produce Edible Fleshy Fruits with a Prominent Value in the Global Market: An Evolutionary Perspective
Source: MDPI journal article supplement (doi:10.3390/plants11020203), 2022-01-13
Supplement: s1 [file s1]

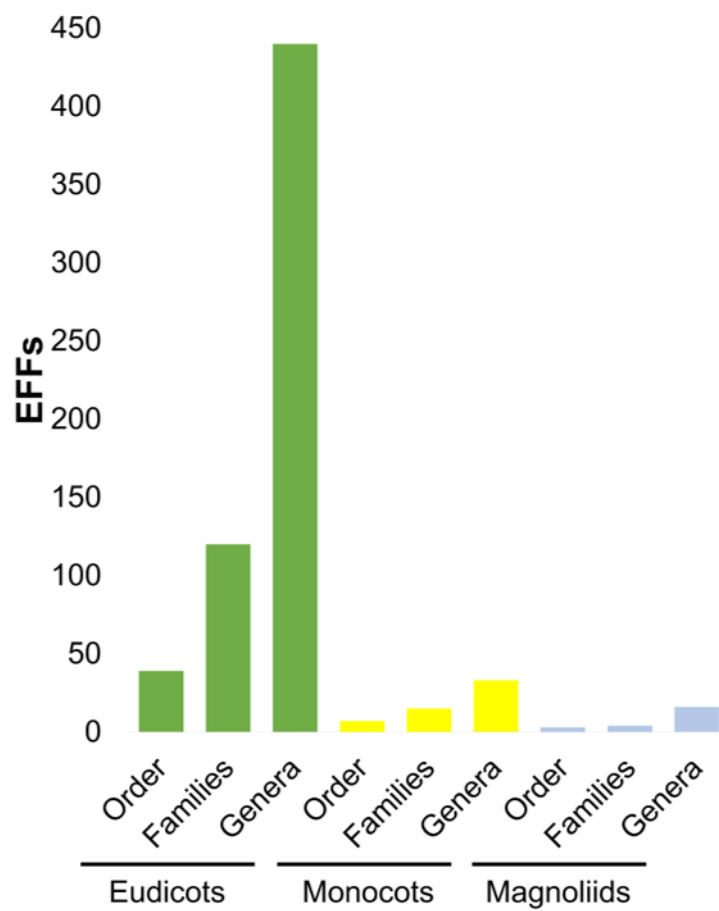

**Figure S1.** Hierarchical classification of more than 2000 EFFs.

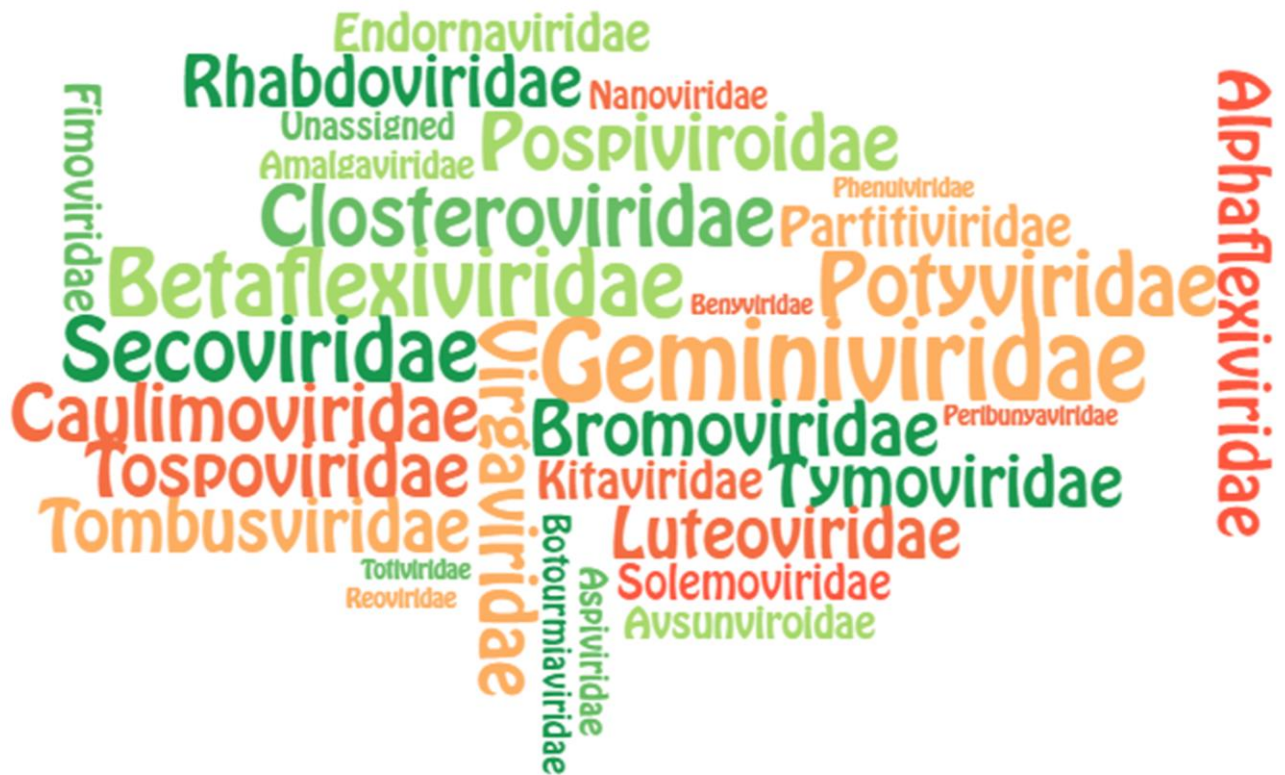

Figure S2. Virus families infecting the 64 commercially important ERFs.

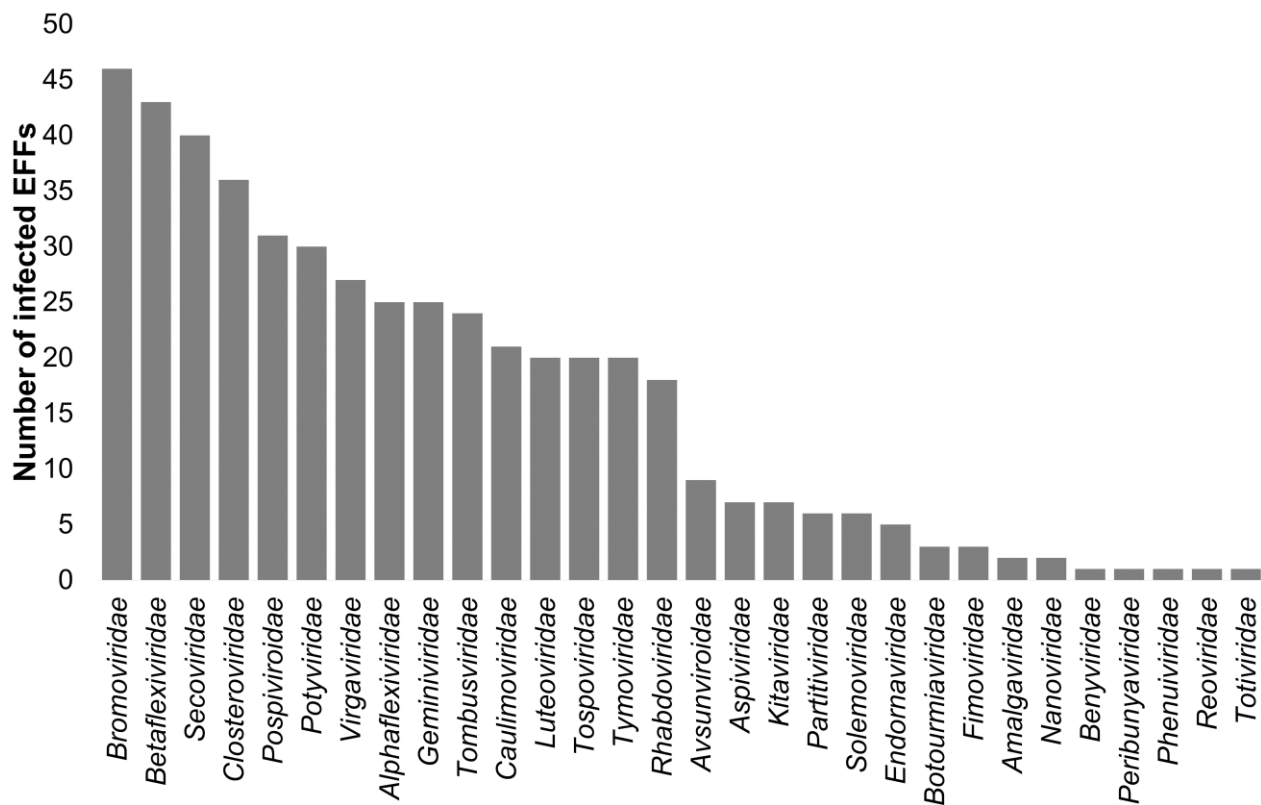

**Figure S3.** Host range of virus families infecting the 64 commercially important EFFs.
