# Supplementary material for: Viruses Infecting Trees and Herbs That Produce Edible Fleshy Fruits with a Prominent Value in the Global Market: An Evolutionary Perspective
Source: Plants (Basel). 2022 Jan 13;11(2):203. doi: 10.3390/plants11020203 (PMC8778216; doi:10.3390/plants11020203)
Supplement: Supplementary file 1 [file plants-11-00203-s001.zip]

Archive with 5 entries (5 files):
- plants-1343172- supplementary figures for xml.pdf
- Supplementary Table S1.xlsx
- Supplementary Table S2.xlsx
- Supplementary Table S3.xlsx
- Supplementary Table S4.xlsx
