# Supplementary material for: Viruses Infecting Trees and Herbs That Produce Edible Fleshy Fruits with a Prominent Value in the Global Market: An Evolutionary Perspective
Source: Plants (Basel). 2022 Jan 13;11(2):203. doi: 10.3390/plants11020203 (PMC8778216; doi:10.3390/plants11020203)
Supplement: Supplementary file 1 [file plants-11-00203-s001.zip › Supplementary Table S1.xlsx]

## Sheet: Fruit trees and herbs
Supplementary Table S1. An inventory of 2235 plant species producing EFFs
EFF	Family	Order	Clade
Pangium edule	Achariaceae	Malpighiales	Eudicot
Actinidia arguta	Actinidiaceae	Ericales	Eudicot
Actinidia arisanensis	Actinidiaceae	Ericales	Eudicot
Actinidia asymmetrica	Actinidiaceae	Ericales	Eudicot
Actinidia callosa	Actinidiaceae	Ericales	Eudicot
Actinidia chinensis	Actinidiaceae	Ericales	Eudicot
Actinidia coriacea	Actinidiaceae	Ericales	Eudicot
Actinidia deliciosa	Actinidiaceae	Ericales	Eudicot
Actinidia eriantha	Actinidiaceae	Ericales	Eudicot
Actinidia fortunatii	Actinidiaceae	Ericales	Eudicot
Actinidia fulvicoma	Actinidiaceae	Ericales	Eudicot
Actinidia giraldii	Actinidiaceae	Ericales	Eudicot
Actinidia glabra	Actinidiaceae	Ericales	Eudicot
Actinidia hemsleyana	Actinidiaceae	Ericales	Eudicot
Actinidia henryi	Actinidiaceae	Ericales	Eudicot
Actinidia holotricha	Actinidiaceae	Ericales	Eudicot
Actinidia hypoleuca	Actinidiaceae	Ericales	Eudicot
Actinidia kiusiana	Actinidiaceae	Ericales	Eudicot
Actinidia kolomikta	Actinidiaceae	Ericales	Eudicot
Actinidia kwangsiensis	Actinidiaceae	Ericales	Eudicot
Actinidia lanceolata	Actinidiaceae	Ericales	Eudicot
Actinidia latifolia	Actinidiaceae	Ericales	Eudicot
Actinidia longicauda	Actinidiaceae	Ericales	Eudicot
Actinidia maloides	Actinidiaceae	Ericales	Eudicot
Actinidia melanandra	Actinidiaceae	Ericales	Eudicot
Actinidia melliana	Actinidiaceae	Ericales	Eudicot
Actinidia petelotii	Actinidiaceae	Ericales	Eudicot
Actinidia pilosula	Actinidiaceae	Ericales	Eudicot
Actinidia polygama	Actinidiaceae	Ericales	Eudicot
Actinidia purpurea	Actinidiaceae	Ericales	Eudicot
Actinidia rubricaulis	Actinidiaceae	Ericales	Eudicot
Actinidia rubus	Actinidiaceae	Ericales	Eudicot
Actinidia rudis	Actinidiaceae	Ericales	Eudicot
Actinidia sabiifolia	Actinidiaceae	Ericales	Eudicot
Actinidia strigosa	Actinidiaceae	Ericales	Eudicot
Actinidia tetramera	Actinidiaceae	Ericales	Eudicot
Actinidia trichogyna	Actinidiaceae	Ericales	Eudicot
Actinidia valvata	Actinidiaceae	Ericales	Eudicot
Actinidia venosa	Actinidiaceae	Ericales	Eudicot
Actinidia x fairchildii	Actinidiaceae	Ericales	Eudicot
Sambucus caerulea	Adoxaceae	Dipsacales	Eudicot
Sambucus chinensis	Adoxaceae	Dipsacales	Eudicot
Sambucus ebulus	Adoxaceae	Dipsacales	Eudicot
Sambucus gaudichaudiana	Adoxaceae	Dipsacales	Eudicot
Sambucus javanica	Adoxaceae	Dipsacales	Eudicot
Sambucus melanocarpa	Adoxaceae	Dipsacales	Eudicot
Sambucus mexicana	Adoxaceae	Dipsacales	Eudicot
Sambucus microbotrys	Adoxaceae	Dipsacales	Eudicot
Sambucus nigra	Adoxaceae	Dipsacales	Eudicot
Sambucus pubens	Adoxaceae	Dipsacales	Eudicot
Sambucus racemosa	Adoxaceae	Dipsacales	Eudicot
Viburnum cassinoides	Adoxaceae	Dipsacales	Eudicot
Viburnum cordifolium	Adoxaceae	Dipsacales	Eudicot
Viburnum corylifolium	Adoxaceae	Dipsacales	Eudicot
Viburnum cotinifolium	Adoxaceae	Dipsacales	Eudicot
Viburnum dentatum	Adoxaceae	Dipsacales	Eudicot
Viburnum dilatatum	Adoxaceae	Dipsacales	Eudicot
Viburnum edule	Adoxaceae	Dipsacales	Eudicot
Viburnum erosum	Adoxaceae	Dipsacales	Eudicot
Viburnum erubescens	Adoxaceae	Dipsacales	Eudicot
Viburnum farreri	Adoxaceae	Dipsacales	Eudicot
Viburnum foetens	Adoxaceae	Dipsacales	Eudicot
Viburnum fordiae	Adoxaceae	Dipsacales	Eudicot
Viburnum furcatum	Adoxaceae	Dipsacales	Eudicot
Viburnum grandiflorum	Adoxaceae	Dipsacales	Eudicot
Viburnum japonicum	Adoxaceae	Dipsacales	Eudicot
Viburnum lantana	Adoxaceae	Dipsacales	Eudicot
Viburnum lantanoides	Adoxaceae	Dipsacales	Eudicot
Viburnum lentago	Adoxaceae	Dipsacales	Eudicot
Viburnum mongolicum	Adoxaceae	Dipsacales	Eudicot
Viburnum mullaha	Adoxaceae	Dipsacales	Eudicot
Viburnum nudum	Adoxaceae	Dipsacales	Eudicot
Viburnum odoratissimum	Adoxaceae	Dipsacales	Eudicot
Viburnum opulus	Adoxaceae	Dipsacales	Eudicot
Viburnum phlebotrichum	Adoxaceae	Dipsacales	Eudicot
Viburnum plicatum	Adoxaceae	Dipsacales	Eudicot
Viburnum prunifolium	Adoxaceae	Dipsacales	Eudicot
Viburnum rufidulum	Adoxaceae	Dipsacales	Eudicot
Viburnum setigerum	Adoxaceae	Dipsacales	Eudicot
Viburnum sieboldii	Adoxaceae	Dipsacales	Eudicot
Viburnum suspensum	Adoxaceae	Dipsacales	Eudicot
Viburnum trilobum	Adoxaceae	Dipsacales	Eudicot
Viburnum veitchii	Adoxaceae	Dipsacales	Eudicot
Viburnum wrightii	Adoxaceae	Dipsacales	Eudicot
Viburnum wrightii hessei	Adoxaceae	Dipsacales	Eudicot
Viburnum x bodnantense	Adoxaceae	Dipsacales	Eudicot
Carpobrotus acinaciformis	Aizoaceae	Caryophyllales	Eudicot
Carpobrotus aequilaterus	Aizoaceae	Caryophyllales	Eudicot
Carpobrotus deliciosus	Aizoaceae	Caryophyllales	Eudicot
Carpobrotus edulis	Aizoaceae	Caryophyllales	Eudicot
Disphyma australe	Aizoaceae	Caryophyllales	Eudicot
Mesembryanthemum crystallinum	Aizoaceae	Caryophyllales	Eudicot
Chenopodium capitatum	Amaranthaceae	Caryophyllales	Eudicot
Chenopodium foliosum	Amaranthaceae	Caryophyllales	Eudicot
Chenopodium nutans	Amaranthaceae	Caryophyllales	Eudicot
Chenopodium overi	Amaranthaceae	Caryophyllales	Eudicot
Enchylaena tomentosa	Amaranthaceae	Caryophyllales	Eudicot
Rhagodia spinescens	Amaranthaceae	Caryophyllales	Eudicot
Anacardium occidentale	Anacardiaceae	Sapindales	Eudicot
Anacardium giganteum	Anacardiaceae	Sapindales	Eudicot
Bouea macrophylla	Anacardiaceae	Sapindales	Eudicot
Bouea oppositifolia	Anacardiaceae	Sapindales	Eudicot
Buchanania lanzan	Anacardiaceae	Sapindales	Eudicot
Cyrtocarpa procera	Anacardiaceae	Sapindales	Eudicot
Dracontomelum mangiferum	Anacardiaceae	Sapindales	Eudicot
Harpephyllum caffrum	Anacardiaceae	Sapindales	Eudicot
Lannea acida	Anacardiaceae	Sapindales	Eudicot
Mangifera caesia	Anacardiaceae	Sapindales	Eudicot
Mangifera foetida	Anacardiaceae	Sapindales	Eudicot
Mangifera indica	Anacardiaceae	Sapindales	Eudicot
Mangifera kemanga	Anacardiaceae	Sapindales	Eudicot
Mangifera odorata	Anacardiaceae	Sapindales	Eudicot
Mangifera rubropetala	Anacardiaceae	Sapindales	Eudicot
Pleiogynium solandri	Anacardiaceae	Sapindales	Eudicot
Poupartia amazonica	Anacardiaceae	Sapindales	Eudicot
Pseudospondias microcarpa	Anacardiaceae	Sapindales	Eudicot
Rhus aromatica	Anacardiaceae	Sapindales	Eudicot
Rhus chinensis	Anacardiaceae	Sapindales	Eudicot
Rhus copallina	Anacardiaceae	Sapindales	Eudicot
Rhus coriaria	Anacardiaceae	Sapindales	Eudicot
Rhus glabra	Anacardiaceae	Sapindales	Eudicot
Rhus integrifolia	Anacardiaceae	Sapindales	Eudicot
Rhus microphylla	Anacardiaceae	Sapindales	Eudicot
Rhus ovata	Anacardiaceae	Sapindales	Eudicot
Rhus punjabensis	Anacardiaceae	Sapindales	Eudicot
Rhus punjabensis sinica	Anacardiaceae	Sapindales	Eudicot
Rhus sempervirens	Anacardiaceae	Sapindales	Eudicot
Rhus succedanea	Anacardiaceae	Sapindales	Eudicot
Rhus trilobata	Anacardiaceae	Sapindales	Eudicot
Rhus typhina	Anacardiaceae	Sapindales	Eudicot
Rhus x pulvinata	Anacardiaceae	Sapindales	Eudicot
Sclerocarya caffra	Anacardiaceae	Sapindales	Eudicot
Sclerocarya birrea	Anacardiaceae	Sapindales	Eudicot
Semecarpus anacardium	Anacardiaceae	Sapindales	Eudicot
Spondias cytherea	Anacardiaceae	Sapindales	Eudicot
Spondias dulcis	Anacardiaceae	Sapindales	Eudicot
Spondias lakonensis	Anacardiaceae	Sapindales	Eudicot
Spondias macrocarpa	Anacardiaceae	Sapindales	Eudicot
Spondias mombin	Anacardiaceae	Sapindales	Eudicot
Spondias pinnata	Anacardiaceae	Sapindales	Eudicot
Spondias purpurea	Anacardiaceae	Sapindales	Eudicot
Spondias radlkoferi	Anacardiaceae	Sapindales	Eudicot
Spondias tuberosa	Anacardiaceae	Sapindales	Eudicot
Spondias tuberosum	Anacardiaceae	Sapindales	Eudicot
Spondias venulosa	Anacardiaceae	Sapindales	Eudicot
Anacardium humile	Anacardiaceae	Sapindales	Eudicot
Anacardium microcarpum	Anacardiaceae	Sapindales	Eudicot
Anacardium negrense	Anacardiaceae	Sapindales	Eudicot
Ancylobothrys petersiana	Apocynaceae	Gentianales	Eudicot
Carissa carandas	Apocynaceae	Gentianales	Eudicot
Carissa congesta	Apocynaceae	Gentianales	Eudicot
Carissa edulis	Apocynaceae	Gentianales	Eudicot
Carissa grandiflora	Apocynaceae	Gentianales	Eudicot
Carissa macrocarpa	Apocynaceae	Gentianales	Eudicot
Couma macrocarpa	Apocynaceae	Gentianales	Eudicot
Couma utilis	Apocynaceae	Gentianales	Eudicot
Hancornia speciosa	Apocynaceae	Gentianales	Eudicot
Lacmellea edulis	Apocynaceae	Gentianales	Eudicot
Landolphia heudelotii	Apocynaceae	Gentianales	Eudicot
Landolphia kirkii	Apocynaceae	Gentianales	Eudicot
Metaplexis japonica	Apocynaceae	Gentianales	Eudicot
Mondia whitei	Apocynaceae	Gentianales	Eudicot
Saba senegalensis	Apocynaceae	Gentianales	Eudicot
Willughbeia coriacea	Apocynaceae	Gentianales	Eudicot
Willughbeia edulis	Apocynaceae	Gentianales	Eudicot
Ambelania acida	Apocynaceae	Gentianales	Eudicot
Couma guianensis	Apocynaceae	Gentianales	Eudicot
Lacmellea arborescens	Apocynaceae	Gentianales	Eudicot
Parahancornia amapa	Apocynaceae	Gentianales	Eudicot
Ilex chapaensis	Aquifoliaceae	Aquifoliales	Eudicot
Ilex coriacea	Aquifoliaceae	Aquifoliales	Eudicot
Ilex cornuta	Aquifoliaceae	Aquifoliales	Eudicot
Ilex crenata	Aquifoliaceae	Aquifoliales	Eudicot
Nemopanthus mucronatus	Aquifoliaceae	Aquifoliales	Eudicot
Acmella oleracea	Asteraceae	Asterales	Eudicot
Basella alba	Basellaceae	Caryophyllales	Eudicot
Basella rubra	Basellaceae	Caryophyllales	Eudicot
Berberis aggregata	Berberidaceae	Ranunculales	Eudicot
Berberis amurensis	Berberidaceae	Ranunculales	Eudicot
Berberis angulosa	Berberidaceae	Ranunculales	Eudicot
Berberis aristata	Berberidaceae	Ranunculales	Eudicot
Berberis asiatica	Berberidaceae	Ranunculales	Eudicot
Berberis buxifolia	Berberidaceae	Ranunculales	Eudicot
Berberis calliantha	Berberidaceae	Ranunculales	Eudicot
Berberis canadensis	Berberidaceae	Ranunculales	Eudicot
Berberis capillaris	Berberidaceae	Ranunculales	Eudicot
Berberis chengii	Berberidaceae	Ranunculales	Eudicot
Berberis chinensis	Berberidaceae	Ranunculales	Eudicot
Berberis chitria	Berberidaceae	Ranunculales	Eudicot
Berberis concinna	Berberidaceae	Ranunculales	Eudicot
Berberis cooperi	Berberidaceae	Ranunculales	Eudicot
Berberis darwinii	Berberidaceae	Ranunculales	Eudicot
Berberis empetrifolia	Berberidaceae	Ranunculales	Eudicot
Berberis everstiana	Berberidaceae	Ranunculales	Eudicot
Berberis fendleri	Berberidaceae	Ranunculales	Eudicot
Berberis flexuosa	Berberidaceae	Ranunculales	Eudicot
Berberis gagnepainii	Berberidaceae	Ranunculales	Eudicot
Berberis georgii	Berberidaceae	Ranunculales	Eudicot
Berberis heterophylla	Berberidaceae	Ranunculales	Eudicot
Berberis jaeschkeana	Berberidaceae	Ranunculales	Eudicot
Berberis koreana	Berberidaceae	Ranunculales	Eudicot
Berberis lycium	Berberidaceae	Ranunculales	Eudicot
Berberis parisepala	Berberidaceae	Ranunculales	Eudicot
Berberis rariflora	Berberidaceae	Ranunculales	Eudicot
Berberis rubrostilla	Berberidaceae	Ranunculales	Eudicot
Berberis ruscifolia	Berberidaceae	Ranunculales	Eudicot
Berberis sherriffii	Berberidaceae	Ranunculales	Eudicot
Berberis sibirica	Berberidaceae	Ranunculales	Eudicot
Berberis sieboldii	Berberidaceae	Ranunculales	Eudicot
Berberis sikkimensis	Berberidaceae	Ranunculales	Eudicot
Berberis soulieana	Berberidaceae	Ranunculales	Eudicot
Berberis thunbergii	Berberidaceae	Ranunculales	Eudicot
Berberis tomentosa	Berberidaceae	Ranunculales	Eudicot
Berberis ulcina	Berberidaceae	Ranunculales	Eudicot
Berberis verruculosa	Berberidaceae	Ranunculales	Eudicot
Berberis vulgaris	Berberidaceae	Ranunculales	Eudicot
Berberis wilsoniae	Berberidaceae	Ranunculales	Eudicot
Berberis x carminea	Berberidaceae	Ranunculales	Eudicot
Berberis x lologensis	Berberidaceae	Ranunculales	Eudicot
Berberis x stenophylla	Berberidaceae	Ranunculales	Eudicot
Diphylleia grayi	Berberidaceae	Ranunculales	Eudicot
Holboellia angustifolia	Berberidaceae	Ranunculales	Eudicot
Holboellia coriacea	Berberidaceae	Ranunculales	Eudicot
Holboellia grandiflora	Berberidaceae	Ranunculales	Eudicot
Holboellia latifolia	Berberidaceae	Ranunculales	Eudicot
Mahoberberis aquisargentii	Berberidaceae	Ranunculales	Eudicot
Mahonia aquifolium	Berberidaceae	Ranunculales	Eudicot
Mahonia bealei	Berberidaceae	Ranunculales	Eudicot
Mahonia confusa	Berberidaceae	Ranunculales	Eudicot
Mahonia flavida	Berberidaceae	Ranunculales	Eudicot
Mahonia fremontii	Berberidaceae	Ranunculales	Eudicot
Mahonia ganpinensis	Berberidaceae	Ranunculales	Eudicot
Mahonia gracilipes	Berberidaceae	Ranunculales	Eudicot
Mahonia gracilis	Berberidaceae	Ranunculales	Eudicot
Mahonia haematocarpa	Berberidaceae	Ranunculales	Eudicot
Mahonia japonica	Berberidaceae	Ranunculales	Eudicot
Mahonia lomariifolia	Berberidaceae	Ranunculales	Eudicot
Mahonia napaulensis	Berberidaceae	Ranunculales	Eudicot
Mahonia nervosa	Berberidaceae	Ranunculales	Eudicot
Mahonia nevinii	Berberidaceae	Ranunculales	Eudicot
Mahonia pinnata	Berberidaceae	Ranunculales	Eudicot
Mahonia pumila	Berberidaceae	Ranunculales	Eudicot
Mahonia repens	Berberidaceae	Ranunculales	Eudicot
Mahonia swaseyi	Berberidaceae	Ranunculales	Eudicot
Mahonia trifoliolata	Berberidaceae	Ranunculales	Eudicot
Mahonia x media	Berberidaceae	Ranunculales	Eudicot
Nandina domestica	Berberidaceae	Ranunculales	Eudicot
Podophyllum aurantiocaule	Berberidaceae	Ranunculales	Eudicot
Podophyllum hexandrum	Berberidaceae	Ranunculales	Eudicot
Podophyllum peltatum	Berberidaceae	Ranunculales	Eudicot
Podophyllum pleianthum	Berberidaceae	Ranunculales	Eudicot
Podophyllum versipelle	Berberidaceae	Ranunculales	Eudicot
Crescentia alata	Bignoniaceae	Lamiales	Eudicot
Crescentia cujete	Bignoniaceae	Lamiales	Eudicot
Parmentiera aculeata	Bignoniaceae	Lamiales	Eudicot
Parmentiera cereifera	Bignoniaceae	Lamiales	Eudicot
Carmona retusa	Boraginaceae	Boraginales	Eudicot
Cordia alliodora	Boraginaceae	Boraginales	Eudicot
Cordia bicolor	Boraginaceae	Boraginales	Eudicot
Cordia dodecandra	Boraginaceae	Boraginales	Eudicot
Ehretia acuminata	Boraginaceae	Boraginales	Eudicot
Ehretia anacua	Boraginaceae	Boraginales	Eudicot
Ehretia dicksonii	Boraginaceae	Boraginales	Eudicot
Ehretia ovalifolia	Boraginaceae	Boraginales	Eudicot
Canarium album	Burseraceae	Sapindales	Eudicot
Canarium luzonicum	Burseraceae	Sapindales	Eudicot
Canarium odontophyllum	Burseraceae	Sapindales	Eudicot
Canarium ovatum	Burseraceae	Sapindales	Eudicot
Canarium schweinfurtii	Burseraceae	Sapindales	Eudicot
Dacryodes edulis	Burseraceae	Sapindales	Eudicot
Pachysandra terminalis	Buxaceae	Buxales	Eudicot
Acanthocereus tetragonus	Cactaceae	Caryophyllales	Eudicot
Cereus hexagonus	Cactaceae	Caryophyllales	Eudicot
Cereus hildmannianus	Cactaceae	Caryophyllales	Eudicot
Cereus repandus	Cactaceae	Caryophyllales	Eudicot
Cylindropuntia spp.	Cactaceae	Caryophyllales	Eudicot
Escontria chiotilla	Cactaceae	Caryophyllales	Eudicot
Hylocereus costaricensis	Cactaceae	Caryophyllales	Eudicot
Hylocereus guatemalensis	Cactaceae	Caryophyllales	Eudicot
Hylocereus megalanthus	Cactaceae	Caryophyllales	Eudicot
Hylocereus undatus	Cactaceae	Caryophyllales	Eudicot
Nopalea cochenillifera	Cactaceae	Caryophyllales	Eudicot
Nopalea dejecta	Cactaceae	Caryophyllales	Eudicot
Opuntia ficus-indica	Cactaceae	Caryophyllales	Eudicot
Opuntia boldinghii	Cactaceae	Caryophyllales	Eudicot
Opuntia compressa	Cactaceae	Caryophyllales	Eudicot
Opuntia crystalenia	Cactaceae	Caryophyllales	Eudicot
Opuntia dillenii	Cactaceae	Caryophyllales	Eudicot
Opuntia elatior	Cactaceae	Caryophyllales	Eudicot
Opuntia engelmannii	Cactaceae	Caryophyllales	Eudicot
Opuntia erinacea	Cactaceae	Caryophyllales	Eudicot
Opuntia ficus-indica	Cactaceae	Caryophyllales	Eudicot
Opuntia fragilis	Cactaceae	Caryophyllales	Eudicot
Opuntia fusicaulis	Cactaceae	Caryophyllales	Eudicot
Opuntia howeyi	Cactaceae	Caryophyllales	Eudicot
Opuntia hyptiacantha	Cactaceae	Caryophyllales	Eudicot
Opuntia imbricata	Cactaceae	Caryophyllales	Eudicot
Opuntia leucotricha	Cactaceae	Caryophyllales	Eudicot
Opuntia littoralis	Cactaceae	Caryophyllales	Eudicot
Opuntia macrorhiza	Cactaceae	Caryophyllales	Eudicot
Opuntia microdasys	Cactaceae	Caryophyllales	Eudicot
Opuntia phaeacantha	Cactaceae	Caryophyllales	Eudicot
Opuntia polyacantha	Cactaceae	Caryophyllales	Eudicot
Opuntia ramosissima	Cactaceae	Caryophyllales	Eudicot
Opuntia robusta	Cactaceae	Caryophyllales	Eudicot
Opuntia tomentosa	Cactaceae	Caryophyllales	Eudicot
Opuntia undulata	Cactaceae	Caryophyllales	Eudicot
Pereskia aculeata	Cactaceae	Caryophyllales	Eudicot
Polaskia chichipe	Cactaceae	Caryophyllales	Eudicot
Stenocereus griseus	Cactaceae	Caryophyllales	Eudicot
Stenocereus pruinosus	Cactaceae	Caryophyllales	Eudicot
Stenocereus queretaroensis	Cactaceae	Caryophyllales	Eudicot
Stenocereus stellatus	Cactaceae	Caryophyllales	Eudicot
Mammea americana	Calophyllaceae	Malpighiales	Eudicot
Selenocereus megalanthus	Campanulaceae	Asterales	Eudicot
Celtis australis	Cannabaceae	Rosales	Eudicot
Celtis boninensis	Cannabaceae	Rosales	Eudicot
Celtis bungeana	Cannabaceae	Rosales	Eudicot
Celtis caucasica	Cannabaceae	Rosales	Eudicot
Celtis glycycarpa	Cannabaceae	Rosales	Eudicot
Celtis jessoensis	Cannabaceae	Rosales	Eudicot
Celtis koraiensis	Cannabaceae	Rosales	Eudicot
Celtis laevigata	Cannabaceae	Rosales	Eudicot
Celtis laveillei	Cannabaceae	Rosales	Eudicot
Celtis lindheimeri	Cannabaceae	Rosales	Eudicot
Celtis occidentalis	Cannabaceae	Rosales	Eudicot
Celtis pallida	Cannabaceae	Rosales	Eudicot
Celtis reticulata	Cannabaceae	Rosales	Eudicot
Celtis sinensis	Cannabaceae	Rosales	Eudicot
Celtis tenuifolia	Cannabaceae	Rosales	Eudicot
Celtis tetrandra	Cannabaceae	Rosales	Eudicot
Celtis tournefortii	Cannabaceae	Rosales	Eudicot
Capparis spinosa	Capparaceae	Brassicales	Eudicot
Leycesteria formosa	Caprifoliaceae	Dipsacales	Eudicot
Lonicera affinis	Caprifoliaceae	Dipsacales	Eudicot
Lonicera angustifolia	Caprifoliaceae	Dipsacales	Eudicot
Lonicera caerulea	Caprifoliaceae	Dipsacales	Eudicot
Lonicera canadensis	Caprifoliaceae	Dipsacales	Eudicot
Lonicera caprifolium	Caprifoliaceae	Dipsacales	Eudicot
Lonicera chrysantha	Caprifoliaceae	Dipsacales	Eudicot
Lonicera ciliosa	Caprifoliaceae	Dipsacales	Eudicot
Lonicera gracilipes	Caprifoliaceae	Dipsacales	Eudicot
Lonicera gracilipes glabra	Caprifoliaceae	Dipsacales	Eudicot
Lonicera involucrata	Caprifoliaceae	Dipsacales	Eudicot
Lonicera morrowii	Caprifoliaceae	Dipsacales	Eudicot
Lonicera utahensis	Caprifoliaceae	Dipsacales	Eudicot
Lonicera venulosa	Caprifoliaceae	Dipsacales	Eudicot
Lonicera villosa	Caprifoliaceae	Dipsacales	Eudicot
Symphoricarpos albus	Caprifoliaceae	Dipsacales	Eudicot
Symphoricarpos occidentalis	Caprifoliaceae	Dipsacales	Eudicot
Symphoricarpos orbiculatus	Caprifoliaceae	Dipsacales	Eudicot
Carica candamarcensis	Caricaceae	Brassicales	Eudicot
Carica papaya	Caricaceae	Brassicales	Eudicot
Carica pentagona	Caricaceae	Brassicales	Eudicot
Carica pubescens	Caricaceae	Brassicales	Eudicot
Carica stipulata	Caricaceae	Brassicales	Eudicot
Carica x heilbornii	Caricaceae	Brassicales	Eudicot
Vasconcellea pubescens	Caricaceae	Brassicales	Eudicot
Vasconcellea x heilbornii	Caricaceae	Brassicales	Eudicot
Caryocar villosum	Caryocaraceae	Malpighiales	Eudicot
Jacaratia spinosa	Caryocaraceae	Malpighiales	Eudicot
Caryocar brasiliense	Caryocaraceae	Malpighiales	Eudicot
Caryocar nuciferum	Caryocaraceae	Malpighiales	Eudicot
Euonymus alatus	Celastraceae	Celastrales	Eudicot
Euonymus atropurpureus	Celastraceae	Celastrales	Eudicot
Euonymus miyakei	Celastraceae	Celastrales	Eudicot
Euonymus tanakae	Celastraceae	Celastrales	Eudicot
Cephalotaxus fortunei	Cephalotaxaceae	Pinales	Eudicot
Cephalotaxus harringtonia	Cephalotaxaceae	Pinales	Eudicot
Cephalotaxus lanceolata	Cephalotaxaceae	Pinales	Eudicot
Cephalotaxus oliveri	Cephalotaxaceae	Pinales	Eudicot
Cephalotaxus sinensis	Cephalotaxaceae	Pinales	Eudicot
Cephalotaxus wilsoniana	Cephalotaxaceae	Pinales	Eudicot
Chrysobalanus icaco	Chrysobalanaceae	Malpighiales	Eudicot
Couepia bracteosa	Chrysobalanaceae	Malpighiales	Eudicot
Couepia polyandra	Chrysobalanaceae	Malpighiales	Eudicot
Hirtella polyandra	Chrysobalanaceae	Malpighiales	Eudicot
Licania platypus	Chrysobalanaceae	Malpighiales	Eudicot
Parinari curatellifolia	Chrysobalanaceae	Malpighiales	Eudicot
Couepia edulis	Chrysobalanaceae	Malpighiales	Eudicot
Couepia longipendula	Chrysobalanaceae	Malpighiales	Eudicot
Couepia paraensis	Chrysobalanaceae	Malpighiales	Eudicot
Couepia subcordata	Chrysobalanaceae	Malpighiales	Eudicot
Licania tomentosa	Chrysobalanaceae	Malpighiales	Eudicot
Garcinia atroviridis	Clusiaceae	Malpighiales	Eudicot
Garcinia brasiliensis	Clusiaceae	Malpighiales	Eudicot
Garcinia cochinchinensis	Clusiaceae	Malpighiales	Eudicot
Garcinia dulcis	Clusiaceae	Malpighiales	Eudicot
Garcinia elliptica	Clusiaceae	Malpighiales	Eudicot
Garcinia gardneriana	Clusiaceae	Malpighiales	Eudicot
Garcinia gummi-gutta	Clusiaceae	Malpighiales	Eudicot
Garcinia hombroniana	Clusiaceae	Malpighiales	Eudicot
Garcinia indica	Clusiaceae	Malpighiales	Eudicot
Garcinia intermedia	Clusiaceae	Malpighiales	Eudicot
Garcinia kola	Clusiaceae	Malpighiales	Eudicot
Garcinia livingstonei	Clusiaceae	Malpighiales	Eudicot
Garcinia madruno	Clusiaceae	Malpighiales	Eudicot
Garcinia magnifolia	Clusiaceae	Malpighiales	Eudicot
Garcinia mangostana	Clusiaceae	Malpighiales	Eudicot
Garcinia morella	Clusiaceae	Malpighiales	Eudicot
Garcinia multiflora	Clusiaceae	Malpighiales	Eudicot
Garcinia pedunculata	Clusiaceae	Malpighiales	Eudicot
Garcinia prainiana	Clusiaceae	Malpighiales	Eudicot
Garcinia tinctoria	Clusiaceae	Malpighiales	Eudicot
Garcinia tinctorius	Clusiaceae	Malpighiales	Eudicot
Garcinia xanthochymus	Clusiaceae	Malpighiales	Eudicot
Platonia insignis	Clusiaceae	Malpighiales	Eudicot
Rheedia acuminata	Clusiaceae	Malpighiales	Eudicot
Rheedia brasiliensis	Clusiaceae	Malpighiales	Eudicot
Rheedia gardneriana	Clusiaceae	Malpighiales	Eudicot
Rheedia macrophylla	Clusiaceae	Malpighiales	Eudicot
Coriaria napalensis	Coriariaceae	Cucurbitales	Eudicot
Coriaria ruscifolia	Coriariaceae	Cucurbitales	Eudicot
Coriaria sarmentosa	Coriariaceae	Cucurbitales	Eudicot
Coriaria sinica	Coriariaceae	Cucurbitales	Eudicot
Coriaria terminalis	Coriariaceae	Cucurbitales	Eudicot
Cornus amomum	Cornaceae	Cornales	Eudicot
Cornus australis	Cornaceae	Cornales	Eudicot
Cornus canadensis	Cornaceae	Cornales	Eudicot
Cornus capitata	Cornaceae	Cornales	Eudicot
Cornus chinensis	Cornaceae	Cornales	Eudicot
Cornus controversa	Cornaceae	Cornales	Eudicot
Cornus elliptica	Cornaceae	Cornales	Eudicot
Cornus hongkongensis	Cornaceae	Cornales	Eudicot
Cornus iberica	Cornaceae	Cornales	Eudicot
Cornus kousa	Cornaceae	Cornales	Eudicot
Cornus macrophylla	Cornaceae	Cornales	Eudicot
Cornus mas	Cornaceae	Cornales	Eudicot
Cornus monbeigii	Cornaceae	Cornales	Eudicot
Cornus multinervosa	Cornaceae	Cornales	Eudicot
Cornus nuttallii	Cornaceae	Cornales	Eudicot
Cornus occidentalis	Cornaceae	Cornales	Eudicot
Cornus officinalis	Cornaceae	Cornales	Eudicot
Cornus poliophylla	Cornaceae	Cornales	Eudicot
Cornus quinquenervis	Cornaceae	Cornales	Eudicot
Cornus sanguinea	Cornaceae	Cornales	Eudicot
Cornus sericea	Cornaceae	Cornales	Eudicot
Cornus sessilis	Cornaceae	Cornales	Eudicot
Cornus suecica	Cornaceae	Cornales	Eudicot
Cornus x unalaschkensis	Cornaceae	Cornales	Eudicot
Corynocarpus laevigatus	Corynocarpaceae	Cucurbitales	Eudicot
Abobra tenuifolia	Cucurbitaceae	Cucurbitales	Eudicot
Acanthosicyos horridus	Cucurbitaceae	Cucurbitales	Eudicot
Benincasa hispida	Cucurbitaceae	Cucurbitales	Eudicot
Citrullus colocynthis	Cucurbitaceae	Cucurbitales	Eudicot
Citrullus lanatus	Cucurbitaceae	Cucurbitales	Eudicot
Coccinia grandis	Cucurbitaceae	Cucurbitales	Eudicot
Cucumis anguria	Cucurbitaceae	Cucurbitales	Eudicot
Cucumis melo	Cucurbitaceae	Cucurbitales	Eudicot
Cucumis melo chito	Cucurbitaceae	Cucurbitales	Eudicot
Cucumis metuliferus	Cucurbitaceae	Cucurbitales	Eudicot
Cucumis sativus	Cucurbitaceae	Cucurbitales	Eudicot
Cucurbita argyrosperma	Cucurbitaceae	Cucurbitales	Eudicot
Cucurbita ficifolia	Cucurbitaceae	Cucurbitales	Eudicot
Cucurbita foetidissima	Cucurbitaceae	Cucurbitales	Eudicot
Cucurbita maxima	Cucurbitaceae	Cucurbitales	Eudicot
Cucurbita mixta	Cucurbitaceae	Cucurbitales	Eudicot
Cucurbita moschata	Cucurbitaceae	Cucurbitales	Eudicot
Cucurbita pepo	Cucurbitaceae	Cucurbitales	Eudicot
Cyclanthera brachystachya	Cucurbitaceae	Cucurbitales	Eudicot
Cyclanthera pedata	Cucurbitaceae	Cucurbitales	Eudicot
Lagenaria siceraria	Cucurbitaceae	Cucurbitales	Eudicot
Luffa acutangula	Cucurbitaceae	Cucurbitales	Eudicot
Luffa aegyptiaca	Cucurbitaceae	Cucurbitales	Eudicot
Luffa cylindrica	Cucurbitaceae	Cucurbitales	Eudicot
Momordica charantia	Cucurbitaceae	Cucurbitales	Eudicot
Momordica cochinchinensis	Cucurbitaceae	Cucurbitales	Eudicot
Mukia maderaspatana	Cucurbitaceae	Cucurbitales	Eudicot
Sechium edule	Cucurbitaceae	Cucurbitales	Eudicot
Sechium tacaco	Cucurbitaceae	Cucurbitales	Eudicot
Sicania odorifera	Cucurbitaceae	Cucurbitales	Eudicot
Sicyos angulatus	Cucurbitaceae	Cucurbitales	Eudicot
Thladiantha dubia	Cucurbitaceae	Cucurbitales	Eudicot
Trichosanthes cucumerina	Cucurbitaceae	Cucurbitales	Eudicot
Trichosanthes dioica	Cucurbitaceae	Cucurbitales	Eudicot
Trichosanthes japonica	Cucurbitaceae	Cucurbitales	Eudicot
Trichosanthes kadam	Cucurbitaceae	Cucurbitales	Eudicot
Trichosanthes kirilowii	Cucurbitaceae	Cucurbitales	Eudicot
Trichosanthes ovigera	Cucurbitaceae	Cucurbitales	Eudicot
Trichosanthes pilosa	Cucurbitaceae	Cucurbitales	Eudicot
Davidsonia pruriens	Cunoniaceae	Oxalidales	Eudicot
Leiospermum racemosum	Cunoniaceae	Oxalidales	Eudicot
Juniperus ashei	Cupressaceae	Pinales	Eudicot
Juniperus californica	Cupressaceae	Pinales	Eudicot
Juniperus communis	Cupressaceae	Pinales	Eudicot
Juniperus conferta	Cupressaceae	Pinales	Eudicot
Juniperus deppeana	Cupressaceae	Pinales	Eudicot
Juniperus drupacea	Cupressaceae	Pinales	Eudicot
Juniperus excelsa	Cupressaceae	Pinales	Eudicot
Juniperus monosperma	Cupressaceae	Pinales	Eudicot
Juniperus occidentalis	Cupressaceae	Pinales	Eudicot
Juniperus osteosperma	Cupressaceae	Pinales	Eudicot
Juniperus recurva	Cupressaceae	Pinales	Eudicot
Juniperus rigida	Cupressaceae	Pinales	Eudicot
Juniperus scopulorum	Cupressaceae	Pinales	Eudicot
Juniperus silicicola	Cupressaceae	Pinales	Eudicot
Juniperus tetragona	Cupressaceae	Pinales	Eudicot
Juniperus virginiana	Cupressaceae	Pinales	Eudicot
Dillenia aurea	Dilleniaceae	Dilleniales	Eudicot
Dillenia indica	Dilleniaceae	Dilleniales	Eudicot
Dillenia pentagyna	Dilleniaceae	Dilleniales	Eudicot
Dillenia su ruticosa	Dilleniaceae	Dilleniales	Eudicot
Shorea robusta	Dipterocarpaceae	Malvales	Eudicot
Diospyros blancoi	Ebenaceae	Ericales	Eudicot
Diospyros celebica	Ebenaceae	Ericales	Eudicot
Diospyros conzattii	Ebenaceae	Ericales	Eudicot
Diospyros digyna	Ebenaceae	Ericales	Eudicot
Diospyros discolor	Ebenaceae	Ericales	Eudicot
Diospyros ebenum	Ebenaceae	Ericales	Eudicot
Diospyros kaki	Ebenaceae	Ericales	Eudicot
Diospyros lotus	Ebenaceae	Ericales	Eudicot
Diospyros major	Ebenaceae	Ericales	Eudicot
Diospyros mespiliformis	Ebenaceae	Ericales	Eudicot
Diospyros nigra	Ebenaceae	Ericales	Eudicot
Diospyros tessellaria	Ebenaceae	Ericales	Eudicot
Diospyros virginiana	Ebenaceae	Ericales	Eudicot
Euclea divinorum	Ebenaceae	Ericales	Eudicot
Eugenia aquea	Ebenaceae	Ericales	Eudicot
Eugenia brasiiensis	Ebenaceae	Ericales	Eudicot
Eugenia brasiliensis	Ebenaceae	Ericales	Eudicot
Eugenia dombeyi	Ebenaceae	Ericales	Eudicot
Eugenia dysenterica	Ebenaceae	Ericales	Eudicot
Eugenia luschnathiana	Ebenaceae	Ericales	Eudicot
Eugenia pyriformis	Ebenaceae	Ericales	Eudicot
Eugenia stipitata	Ebenaceae	Ericales	Eudicot
Eugenia tomentosa	Ebenaceae	Ericales	Eudicot
Eugenia uniflora	Ebenaceae	Ericales	Eudicot
Eugenia uvalha	Ebenaceae	Ericales	Eudicot
Eugenia victoriana	Ebenaceae	Ericales	Eudicot
Elaeagnus angustifolia	Elaeagnaceae	Rosales	Eudicot
Elaeagnus commutata	Elaeagnaceae	Rosales	Eudicot
Elaeagnus cordifolia	Elaeagnaceae	Rosales	Eudicot
Elaeagnus formosana	Elaeagnaceae	Rosales	Eudicot
Elaeagnus fragrans	Elaeagnaceae	Rosales	Eudicot
Elaeagnus glabra	Elaeagnaceae	Rosales	Eudicot
Elaeagnus gonyanthes	Elaeagnaceae	Rosales	Eudicot
Elaeagnus latifolia	Elaeagnaceae	Rosales	Eudicot
Elaeagnus macrophylla	Elaeagnaceae	Rosales	Eudicot
Elaeagnus maritima	Elaeagnaceae	Rosales	Eudicot
Elaeagnus montana	Elaeagnaceae	Rosales	Eudicot
Elaeagnus multiflora	Elaeagnaceae	Rosales	Eudicot
Elaeagnus oldhamii	Elaeagnaceae	Rosales	Eudicot
Elaeagnus orientalis	Elaeagnaceae	Rosales	Eudicot
Elaeagnus parvifolia	Elaeagnaceae	Rosales	Eudicot
Elaeagnus pungens	Elaeagnaceae	Rosales	Eudicot
Elaeagnus pyriformis	Elaeagnaceae	Rosales	Eudicot
Elaeagnus thunbergii	Elaeagnaceae	Rosales	Eudicot
Elaeagnus umbellata	Elaeagnaceae	Rosales	Eudicot
Elaeagnus x ebbingei	Elaeagnaceae	Rosales	Eudicot
Elaeagnus x reflexa	Elaeagnaceae	Rosales	Eudicot
Elaeagnus yoshinoi	Elaeagnaceae	Rosales	Eudicot
Hippophae goniocarpa	Elaeagnaceae	Rosales	Eudicot
Hippophae gyantsensis	Elaeagnaceae	Rosales	Eudicot
Hippophae neurocarpa	Elaeagnaceae	Rosales	Eudicot
Hippophae rhamnoides	Elaeagnaceae	Rosales	Eudicot
Hippophae salicifolia	Elaeagnaceae	Rosales	Eudicot
Hippophae sinensis	Elaeagnaceae	Rosales	Eudicot
Hippophae tibetana	Elaeagnaceae	Rosales	Eudicot
Shepherdia argentea	Elaeagnaceae	Rosales	Eudicot
Shepherdia canadensis	Elaeagnaceae	Rosales	Eudicot
Aristotelia chilensis	Elaeocarpaceae	Oxalidales	Eudicot
Aristotelia serrata	Elaeocarpaceae	Oxalidales	Eudicot
Elaeocarpus cyaneus	Elaeocarpaceae	Oxalidales	Eudicot
Elaeocarpus dentatus	Elaeocarpaceae	Oxalidales	Eudicot
Elaeocarpus floribundus	Elaeocarpaceae	Oxalidales	Eudicot
Elaeocarpus lanceaefolius	Elaeocarpaceae	Oxalidales	Eudicot
Ephedra altissima	Ephedraceae	Ephedrales	Eudicot
Ephedra americana	Ephedraceae	Ephedrales	Eudicot
Ephedra ciliata	Ephedraceae	Ephedrales	Eudicot
Ephedra distachya	Ephedraceae	Ephedrales	Eudicot
Ephedra equisetina	Ephedraceae	Ephedrales	Eudicot
Ephedra fragilis	Ephedraceae	Ephedrales	Eudicot
Ephedra gerardiana	Ephedraceae	Ephedrales	Eudicot
Ephedra intermedia	Ephedraceae	Ephedrales	Eudicot
Ephedra nevadensis	Ephedraceae	Ephedrales	Eudicot
Ephedra pachyclada	Ephedraceae	Ephedrales	Eudicot
Ephedra sinica	Ephedraceae	Ephedrales	Eudicot
Ephedra torreyana	Ephedraceae	Ephedrales	Eudicot
Ephedra triandra	Ephedraceae	Ephedrales	Eudicot
Ephedra trifurca	Ephedraceae	Ephedrales	Eudicot
Ephedra viridis	Ephedraceae	Ephedrales	Eudicot
Arbutus andrachne	Ericaceae	Ericales	Eudicot
Arbutus arizonica	Ericaceae	Ericales	Eudicot
Arbutus canariensis	Ericaceae	Ericales	Eudicot
Arbutus menziesii	Ericaceae	Ericales	Eudicot
Arbutus texana	Ericaceae	Ericales	Eudicot
Arbutus unedo	Ericaceae	Ericales	Eudicot
Arbutus x andrachnoides	Ericaceae	Ericales	Eudicot
Arbutus xalapensis	Ericaceae	Ericales	Eudicot
Arctostaphylos alpina	Ericaceae	Ericales	Eudicot
Arctostaphylos columbiana	Ericaceae	Ericales	Eudicot
Arctostaphylos glauca	Ericaceae	Ericales	Eudicot
Arctostaphylos manzanita	Ericaceae	Ericales	Eudicot
Arctostaphylos nevadensis	Ericaceae	Ericales	Eudicot
Arctostaphylos parryana	Ericaceae	Ericales	Eudicot
Arctostaphylos patula	Ericaceae	Ericales	Eudicot
Arctostaphylos pungens	Ericaceae	Ericales	Eudicot
Arctostaphylos stanfordiana	Ericaceae	Ericales	Eudicot
Arctostaphylos tomentosa	Ericaceae	Ericales	Eudicot
Arctostaphylos uva-ursi	Ericaceae	Ericales	Eudicot
Astroloma humifusum	Ericaceae	Ericales	Eudicot
Astroloma pinifolium	Ericaceae	Ericales	Eudicot
Corema album	Ericaceae	Ericales	Eudicot
Corema conradii	Ericaceae	Ericales	Eudicot
Cyathodes colensoi	Ericaceae	Ericales	Eudicot
Cyathodes fasciculata	Ericaceae	Ericales	Eudicot
Cyathodes fraseri	Ericaceae	Ericales	Eudicot
Cyathodes glauca	Ericaceae	Ericales	Eudicot
Cyathodes juniperina	Ericaceae	Ericales	Eudicot
Cyathodes parviflora	Ericaceae	Ericales	Eudicot
Cyathodes straminea	Ericaceae	Ericales	Eudicot
Empetrum atropurpureum	Ericaceae	Ericales	Eudicot
Empetrum eamesii	Ericaceae	Ericales	Eudicot
Empetrum nigrum	Ericaceae	Ericales	Eudicot
Empetrum rubrum	Ericaceae	Ericales	Eudicot
Epigaea asiatica	Ericaceae	Ericales	Eudicot
Gaultheria adenothrix	Ericaceae	Ericales	Eudicot
Gaultheria antipoda	Ericaceae	Ericales	Eudicot
Gaultheria appressa	Ericaceae	Ericales	Eudicot
Gaultheria cumingiana	Ericaceae	Ericales	Eudicot
Gaultheria depressa	Ericaceae	Ericales	Eudicot
Gaultheria fragrantissima	Ericaceae	Ericales	Eudicot
Gaultheria griffithianum	Ericaceae	Ericales	Eudicot
Gaultheria hispida	Ericaceae	Ericales	Eudicot
Gaultheria hispidula	Ericaceae	Ericales	Eudicot
Gaultheria humifusa	Ericaceae	Ericales	Eudicot
Gaultheria japonica	Ericaceae	Ericales	Eudicot
Gaultheria macrostigma	Ericaceae	Ericales	Eudicot
Gaultheria mucronata	Ericaceae	Ericales	Eudicot
Gaultheria myrsinoides	Ericaceae	Ericales	Eudicot
Gaultheria nummularioides	Ericaceae	Ericales	Eudicot
Gaultheria ovatifolia	Ericaceae	Ericales	Eudicot
Gaultheria procumbens	Ericaceae	Ericales	Eudicot
Gaultheria pumila	Ericaceae	Ericales	Eudicot
Gaultheria pyroliifolia	Ericaceae	Ericales	Eudicot
Gaultheria pyroloides	Ericaceae	Ericales	Eudicot
Gaultheria rigida	Ericaceae	Ericales	Eudicot
Gaultheria sclelophylla	Ericaceae	Ericales	Eudicot
Gaultheria shallon	Ericaceae	Ericales	Eudicot
Gaultheria trichophylla	Ericaceae	Ericales	Eudicot
Gaultheria x wisleyensis	Ericaceae	Ericales	Eudicot
Gaylussacia baccata	Ericaceae	Ericales	Eudicot
Gaylussacia brachycera	Ericaceae	Ericales	Eudicot
Gaylussacia dumosa	Ericaceae	Ericales	Eudicot
Gaylussacia frondosa	Ericaceae	Ericales	Eudicot
Gaylussacia ursina	Ericaceae	Ericales	Eudicot
Leucopogon lanceolatus	Ericaceae	Ericales	Eudicot
Leucopogon leptospermoides	Ericaceae	Ericales	Eudicot
Leucopogon montanus	Ericaceae	Ericales	Eudicot
Lissanthe sapida	Ericaceae	Ericales	Eudicot
Lissanthe strigosa	Ericaceae	Ericales	Eudicot
Menziesia ferruginea	Ericaceae	Ericales	Eudicot
Pentachondra pumila	Ericaceae	Ericales	Eudicot
Pyrola minor	Ericaceae	Ericales	Eudicot
Styphelia adscendens	Ericaceae	Ericales	Eudicot
Styphelia triflora	Ericaceae	Ericales	Eudicot
Styphelia viridis	Ericaceae	Ericales	Eudicot
Trochocarpa clarkei	Ericaceae	Ericales	Eudicot
Trochocarpa cunninghamii	Ericaceae	Ericales	Eudicot
Vaccinium amoenum	Ericaceae	Ericales	Eudicot
Vaccinium angustifolium	Ericaceae	Ericales	Eudicot
Vaccinium arboreum	Ericaceae	Ericales	Eudicot
Vaccinium arbuscula	Ericaceae	Ericales	Eudicot
Vaccinium arctostaphylos	Ericaceae	Ericales	Eudicot
Vaccinium ashei	Ericaceae	Ericales	Eudicot
Vaccinium bracteatum	Ericaceae	Ericales	Eudicot
Vaccinium brittonii	Ericaceae	Ericales	Eudicot
Vaccinium caesariense	Ericaceae	Ericales	Eudicot
Vaccinium caespitosum	Ericaceae	Ericales	Eudicot
Vaccinium ciliatum	Ericaceae	Ericales	Eudicot
Vaccinium constablaei	Ericaceae	Ericales	Eudicot
Vaccinium corymbosum	Ericaceae	Ericales	Eudicot
Vaccinium crassifolium	Ericaceae	Ericales	Eudicot
Vaccinium cylindraceum	Ericaceae	Ericales	Eudicot
Vaccinium darrowii	Ericaceae	Ericales	Eudicot
Vaccinium deliciosum	Ericaceae	Ericales	Eudicot
Vaccinium duclouxii	Ericaceae	Ericales	Eudicot
Vaccinium elliottii	Ericaceae	Ericales	Eudicot
Vaccinium erythrocarpum	Ericaceae	Ericales	Eudicot
Vaccinium formosum	Ericaceae	Ericales	Eudicot
Vaccinium fuscatum	Ericaceae	Ericales	Eudicot
Vaccinium hirsutum	Ericaceae	Ericales	Eudicot
Vaccinium hirtum	Ericaceae	Ericales	Eudicot
Vaccinium japonicum	Ericaceae	Ericales	Eudicot
Vaccinium koreanum	Ericaceae	Ericales	Eudicot
Vaccinium leucanthum	Ericaceae	Ericales	Eudicot
Vaccinium macrocarpon	Ericaceae	Ericales	Eudicot
Vaccinium melanocarpum	Ericaceae	Ericales	Eudicot
Vaccinium membranaceaum	Ericaceae	Ericales	Eudicot
Vaccinium membranaceum	Ericaceae	Ericales	Eudicot
Vaccinium modestum	Ericaceae	Ericales	Eudicot
Vaccinium mortinia	Ericaceae	Ericales	Eudicot
Vaccinium myrsinites	Ericaceae	Ericales	Eudicot
Vaccinium myrtilloides	Ericaceae	Ericales	Eudicot
Vaccinium myrtillus	Ericaceae	Ericales	Eudicot
Vaccinium neglectum	Ericaceae	Ericales	Eudicot
Vaccinium nummularia	Ericaceae	Ericales	Eudicot
Vaccinium oldhamii	Ericaceae	Ericales	Eudicot
Vaccinium ovalifolium	Ericaceae	Ericales	Eudicot
Vaccinium ovatum	Ericaceae	Ericales	Eudicot
Vaccinium oxycoccos	Ericaceae	Ericales	Eudicot
Vaccinium padifolium	Ericaceae	Ericales	Eudicot
Vaccinium parvifolium	Ericaceae	Ericales	Eudicot
Vaccinium praestans	Ericaceae	Ericales	Eudicot
Vaccinium salicinum	Ericaceae	Ericales	Eudicot
Vaccinium scoparium	Ericaceae	Ericales	Eudicot
Vaccinium simulatum	Ericaceae	Ericales	Eudicot
Vaccinium smallii	Ericaceae	Ericales	Eudicot
Vaccinium sprengelii	Ericaceae	Ericales	Eudicot
Vaccinium stamineum	Ericaceae	Ericales	Eudicot
Vaccinium tenellum	Ericaceae	Ericales	Eudicot
Vaccinium uliginosum	Ericaceae	Ericales	Eudicot
Vaccinium vacciniaceum	Ericaceae	Ericales	Eudicot
Vaccinium virgatum	Ericaceae	Ericales	Eudicot
Vaccinium vitis-idaea	Ericaceae	Ericales	Eudicot
Paris japonica	Ericaceae	Ericales	Eudicot
Caryodendron amazonicum	Euphorbiaceae	Malpighiales	Eudicot
Alchornea cordifolia	Euphorbiaceae	Malpighiales	Eudicot
Aleurites fordii	Euphorbiaceae	Malpighiales	Eudicot
Aleurites moluccana	Euphorbiaceae	Malpighiales	Eudicot
Cnidoscolus aconitifolius	Euphorbiaceae	Malpighiales	Eudicot
Hevea brasiliensis	Euphorbiaceae	Malpighiales	Eudicot
Plukenetia verrucosa	Euphorbiaceae	Malpighiales	Eudicot
Acacia catechu	Fabaceae	Fabales	Eudicot
Arachis duranensis	Fabaceae	Fabales	Eudicot
Arachis hypogaea	Fabaceae	Fabales	Eudicot
Arachis ipaensis	Fabaceae	Fabales	Eudicot
Cassia fistula	Fabaceae	Fabales	Eudicot
Cassia grandis	Fabaceae	Fabales	Eudicot
Ceratonia siliqua	Fabaceae	Fabales	Eudicot
Cordyla africana	Fabaceae	Fabales	Eudicot
Cynometra caulifora	Fabaceae	Fabales	Eudicot
Detarium microcarpum	Fabaceae	Fabales	Eudicot
Detarium senegalense	Fabaceae	Fabales	Eudicot
Dialium guianense	Fabaceae	Fabales	Eudicot
Dialium indum	Fabaceae	Fabales	Eudicot
Dipteryx odorata	Fabaceae	Fabales	Eudicot
Exocarpus aphyllus	Fabaceae	Fabales	Eudicot
Exocarpus bidwillii	Fabaceae	Fabales	Eudicot
Exocarpus cupressiformis	Fabaceae	Fabales	Eudicot
Exocarpus latifolius	Fabaceae	Fabales	Eudicot
Exocarpus nanus	Fabaceae	Fabales	Eudicot
Exocarpus strictus	Fabaceae	Fabales	Eudicot
Hymenaea coubaril	Fabaceae	Fabales	Eudicot
Hymenaea courbaril	Fabaceae	Fabales	Eudicot
Hymenaea martiana	Fabaceae	Fabales	Eudicot
Inga cinnamomea	Fabaceae	Fabales	Eudicot
Inga densiflora	Fabaceae	Fabales	Eudicot
Inga edulis	Fabaceae	Fabales	Eudicot
Inga feuilleei	Fabaceae	Fabales	Eudicot
Inga insignis	Fabaceae	Fabales	Eudicot
Inga jinicuil	Fabaceae	Fabales	Eudicot
Inga laurina	Fabaceae	Fabales	Eudicot
Inga oerstediana	Fabaceae	Fabales	Eudicot
Inga spectabilis	Fabaceae	Fabales	Eudicot
Inga vera	Fabaceae	Fabales	Eudicot
Inocarpus fagifer	Fabaceae	Fabales	Eudicot
Lupinus argenteus	Fabaceae	Fabales	Eudicot
Lupinus mutabilis	Fabaceae	Fabales	Eudicot
Neptunia oleracea	Fabaceae	Fabales	Eudicot
Parkia javanica	Fabaceae	Fabales	Eudicot
Parkia speciosa	Fabaceae	Fabales	Eudicot
Parkia timoriana	Fabaceae	Fabales	Eudicot
Pithecellobium dulce	Fabaceae	Fabales	Eudicot
Psophocarpus tetragonolobus	Fabaceae	Fabales	Eudicot
Senna siamea	Fabaceae	Fabales	Eudicot
Tamarindus indica	Fabaceae	Fabales	Eudicot
Hymenaea courbaril	Fabaceae	Fabales	Eudicot
Inga alba	Fabaceae	Fabales	Eudicot
Inga capitata	Fabaceae	Fabales	Eudicot
Inga fagifolia	Fabaceae	Fabales	Eudicot
Inga heterophylla	Fabaceae	Fabales	Eudicot
Inga macrophylla	Fabaceae	Fabales	Eudicot
Inga velutina	Fabaceae	Fabales	Eudicot
Hymenaea stigonocarpa	Fabaceae	Fabales	Eudicot
Gnetum africanum	Gnetaceae	Gnetales	Eudicot
Gnetum buchholzianum	Gnetaceae	Gnetales	Eudicot
Gnetum gnemon	Gnetaceae	Gnetales	Eudicot
Crossotoma spinescens	Goodeniaceae	Asterales	Eudicot
Ribes aciculare	Grossulariaceae	Saxifragales	Eudicot
Ribes alpinum	Grossulariaceae	Saxifragales	Eudicot
Ribes altissimum	Grossulariaceae	Saxifragales	Eudicot
Ribes ambiguum	Grossulariaceae	Saxifragales	Eudicot
Ribes americanum	Grossulariaceae	Saxifragales	Eudicot
Ribes aureum	Grossulariaceae	Saxifragales	Eudicot
Ribes bracteosum	Grossulariaceae	Saxifragales	Eudicot
Ribes burejense	Grossulariaceae	Saxifragales	Eudicot
Ribes californicum	Grossulariaceae	Saxifragales	Eudicot
Ribes cereum	Grossulariaceae	Saxifragales	Eudicot
Ribes curvatum	Grossulariaceae	Saxifragales	Eudicot
Ribes cynosbati	Grossulariaceae	Saxifragales	Eudicot
Ribes diacanthum	Grossulariaceae	Saxifragales	Eudicot
Ribes divaricatum	Grossulariaceae	Saxifragales	Eudicot
Ribes fasciculatum	Grossulariaceae	Saxifragales	Eudicot
Ribes fragrans	Grossulariaceae	Saxifragales	Eudicot
Ribes gayanum	Grossulariaceae	Saxifragales	Eudicot
Ribes glaciale	Grossulariaceae	Saxifragales	Eudicot
Ribes glandulosum	Grossulariaceae	Saxifragales	Eudicot
Ribes griffithii	Grossulariaceae	Saxifragales	Eudicot
Ribes himalense	Grossulariaceae	Saxifragales	Eudicot
Ribes hirtellum	Grossulariaceae	Saxifragales	Eudicot
Ribes horridum	Grossulariaceae	Saxifragales	Eudicot
Ribes hudsonianum	Grossulariaceae	Saxifragales	Eudicot
Ribes inebrians	Grossulariaceae	Saxifragales	Eudicot
Ribes inerme	Grossulariaceae	Saxifragales	Eudicot
Ribes irriguum	Grossulariaceae	Saxifragales	Eudicot
Ribes janczewskii	Grossulariaceae	Saxifragales	Eudicot
Ribes japonicum	Grossulariaceae	Saxifragales	Eudicot
Ribes lacustre	Grossulariaceae	Saxifragales	Eudicot
Ribes latifolium	Grossulariaceae	Saxifragales	Eudicot
Ribes laurifolium	Grossulariaceae	Saxifragales	Eudicot
Ribes laxiflorum	Grossulariaceae	Saxifragales	Eudicot
Ribes leptanthum	Grossulariaceae	Saxifragales	Eudicot
Ribes lobbii	Grossulariaceae	Saxifragales	Eudicot
Ribes longiracemosum	Grossulariaceae	Saxifragales	Eudicot
Ribes luridum	Grossulariaceae	Saxifragales	Eudicot
Ribes magellanicum	Grossulariaceae	Saxifragales	Eudicot
Ribes mandschuricum	Grossulariaceae	Saxifragales	Eudicot
Ribes maximowiczii	Grossulariaceae	Saxifragales	Eudicot
Ribes menziesii	Grossulariaceae	Saxifragales	Eudicot
Ribes meyeri	Grossulariaceae	Saxifragales	Eudicot
Ribes missouriense	Grossulariaceae	Saxifragales	Eudicot
Ribes montigenum	Grossulariaceae	Saxifragales	Eudicot
Ribes multiflorum	Grossulariaceae	Saxifragales	Eudicot
Ribes nigrum	Grossulariaceae	Saxifragales	Eudicot
Ribes niveum	Grossulariaceae	Saxifragales	Eudicot
Ribes odoratum	Grossulariaceae	Saxifragales	Eudicot
Ribes orientale	Grossulariaceae	Saxifragales	Eudicot
Ribes oxyacanthoides	Grossulariaceae	Saxifragales	Eudicot
Ribes palczewskii	Grossulariaceae	Saxifragales	Eudicot
Ribes petiolare	Grossulariaceae	Saxifragales	Eudicot
Ribes petraeum	Grossulariaceae	Saxifragales	Eudicot
Ribes pinetorum	Grossulariaceae	Saxifragales	Eudicot
Ribes procumbens	Grossulariaceae	Saxifragales	Eudicot
Ribes punctatum	Grossulariaceae	Saxifragales	Eudicot
Ribes roezlii	Grossulariaceae	Saxifragales	Eudicot
Ribes rotundifolium	Grossulariaceae	Saxifragales	Eudicot
Ribes rubrum	Grossulariaceae	Saxifragales	Eudicot
Ribes sachalinense	Grossulariaceae	Saxifragales	Eudicot
Ribes sanguineum	Grossulariaceae	Saxifragales	Eudicot
Ribes sativum	Grossulariaceae	Saxifragales	Eudicot
Ribes setosum	Grossulariaceae	Saxifragales	Eudicot
Ribes sinanense	Grossulariaceae	Saxifragales	Eudicot
Ribes spicatum	Grossulariaceae	Saxifragales	Eudicot
Ribes stenocarpum	Grossulariaceae	Saxifragales	Eudicot
Ribes triste	Grossulariaceae	Saxifragales	Eudicot
Ribes ussuriense	Grossulariaceae	Saxifragales	Eudicot
Ribes uva-crispa	Grossulariaceae	Saxifragales	Eudicot
Ribes valdivianum	Grossulariaceae	Saxifragales	Eudicot
Ribes viburnifolium	Grossulariaceae	Saxifragales	Eudicot
Ribes viscosissimum	Grossulariaceae	Saxifragales	Eudicot
Ribes warszewiczii	Grossulariaceae	Saxifragales	Eudicot
Ribes x culverwellii	Grossulariaceae	Saxifragales	Eudicot
Ribes x holosericeum	Grossulariaceae	Saxifragales	Eudicot
Ribes x houghtonianum	Grossulariaceae	Saxifragales	Eudicot
Ribes x robustum	Grossulariaceae	Saxifragales	Eudicot
Gunnera magellanica	Gunneraceae	Gunnerales	Eudicot
Cheiloclinium cognatum	Hippocrateaceae	Celastrales	Eudicot
Peritassa laevigata	Hippocrateaceae	Celastrales	Eudicot
Salacia impressifolia	Hippocrateaceae	Celastrales	Eudicot
Duckesia verrucosa	Humiriaceae	Malpighiales	Eudicot
Humiria balsamifera	Humiriaceae	Malpighiales	Eudicot
Sacoglottis guianensis	Humiriaceae	Malpighiales	Eudicot
Irvingia gabonensis	Irvingiaceae	Malpighiales	Eudicot
Irvingia wombolu	Irvingiaceae	Malpighiales	Eudicot
Carya cathayensis	Juglandaceae	Fagales	Eudicot
Carya illinoinensis	Juglandaceae	Fagales	Eudicot
Carya ovata	Juglandaceae	Fagales	Eudicot
Callicarpa americana	Lamiaceae	Lamiales	Eudicot
Callicarpa macrophylla	Lamiaceae	Lamiales	Eudicot
Callicarpa mollis	Lamiaceae	Lamiales	Eudicot
Clerodendrum kwangtungense	Lamiaceae	Lamiales	Eudicot
Gmelina arborea	Lamiaceae	Lamiales	Eudicot
Origanum vulgare	Lamiaceae	Lamiales	Eudicot
Tectona grandis	Lamiaceae	Lamiales	Eudicot
Vitex doniana	Lamiaceae	Lamiales	Eudicot
Vitex keniensis	Lamiaceae	Lamiales	Eudicot
Vitex madiensis	Lamiaceae	Lamiales	Eudicot
Vitex payos	Lamiaceae	Lamiales	Eudicot
Akebia quinata	Lardizabalaceae	Ranunculales	Eudicot
Akebia trifoliata	Lardizabalaceae	Ranunculales	Eudicot
Akebia x pentaphylla	Lardizabalaceae	Ranunculales	Eudicot
Lardizabala biternata	Lardizabalaceae	Ranunculales	Eudicot
Sinofranchetia chinensis	Lardizabalaceae	Ranunculales	Eudicot
Stauntonia hexaphylla	Lardizabalaceae	Ranunculales	Eudicot
Barringtonia edulis	Lecythidaceae	Ericales	Eudicot
Barringtonia novae-hiberniae	Lecythidaceae	Ericales	Eudicot
Barringtonia procera	Lecythidaceae	Ericales	Eudicot
Bertholletia excelsa	Lecythidaceae	Ericales	Eudicot
Couroupita guianensis	Lecythidaceae	Ericales	Eudicot
Grias cauliflora	Lecythidaceae	Ericales	Eudicot
Grias peruviana	Lecythidaceae	Ericales	Eudicot
Gustavia superba	Lecythidaceae	Ericales	Eudicot
Lecythis zabucajo	Lecythidaceae	Ericales	Eudicot
Strychnos spinosa	Loganiaceae	Gentianales	Eudicot
Punica granatum	Lythraceae	Myrtales	Eudicot
Sonneratia caseolaris	Lythraceae	Myrtales	Eudicot
Bunchosia argentea	Malpighiaceae	Malpighiales	Eudicot
Bunchosia armeniaca	Malpighiaceae	Malpighiales	Eudicot
Bunchosia costaricensis	Malpighiaceae	Malpighiales	Eudicot
Byrsonima crassifolia	Malpighiaceae	Malpighiales	Eudicot
Malpighia emarginata	Malpighiaceae	Malpighiales	Eudicot
Malpighia glabra	Malpighiaceae	Malpighiales	Eudicot
Malpighia urens	Malpighiaceae	Malpighiales	Eudicot
Byrsonima amazonica	Malpighiaceae	Malpighiales	Eudicot
Byrsonima crispa	Malpighiaceae	Malpighiales	Eudicot
Byrsonima lancifolia	Malpighiaceae	Malpighiales	Eudicot
Byrsonima verbascifolia	Malpighiaceae	Malpighiales	Eudicot
Malpighia punicifolia	Malpiguiaceae	Malpighiales	Eudicot
Adansonia digitata	Malvaceae	Malvales	Eudicot
Durio dulcis	Malvaceae	Malvales	Eudicot
Durio oxleyanus	Malvaceae	Malvales	Eudicot
Durio zibethinus	Malvaceae	Malvales	Eudicot
Guazuma ulmifolia	Malvaceae	Malvales	Eudicot
Herrania nitida	Malvaceae	Malvales	Eudicot
Herrania purpurea	Malvaceae	Malvales	Eudicot
Herrania umbratica	Malvaceae	Malvales	Eudicot
Matisia soegengii	Malvaceae	Malvales	Eudicot
Pachira aquatica	Malvaceae	Malvales	Eudicot
Quararibea cordata	Malvaceae	Malvales	Eudicot
Thespesia populnea	Malvaceae	Malvales	Eudicot
Thespesia populneoides	Malvaceae	Malvales	Eudicot
Tilia japonica	Malvaceae	Malvales	Eudicot
Theobroma grandiflorum	Malvaceae	Malvales	Eudicot
Bombacopis glabra	Malvaceae	Malvales	Eudicot
Theobroma bicolor	Malvaceae	Malvales	Eudicot
Theobroma cacao	Malvaceae	Malvales	Eudicot
Theobroma canumanense	Malvaceae	Malvales	Eudicot
Theobroma mariae	Malvaceae	Malvales	Eudicot
Theobroma obovatum	Malvaceae	Malvales	Eudicot
Theobroma speciosum	Malvaceae	Malvales	Eudicot
Theobroma subincanum	Malvaceae	Malvales	Eudicot
Mouriri ficoides	Melastomataceae	Myrtales	Eudicot
Melastoma malabathricum	Melastomataceae	Myrtales	Eudicot
Bellucia grossularioides	Melastomataceae	Myrtales	Eudicot
Mouriri apiranga	Melastomataceae	Myrtales	Eudicot
Mouriri eugeniifolia	Melastomataceae	Myrtales	Eudicot
Mouriri grandiflora	Melastomataceae	Myrtales	Eudicot
Mouriri guianensis	Melastomataceae	Myrtales	Eudicot
Mouriri pusa	Melastomataceae	Myrtales	Eudicot
Mouriri trunciflora	Melastomataceae	Myrtales	Eudicot
Azadirachta indica	Meliaceae	Sapindales	Eudicot
Lansium parasiticum	Meliaceae	Sapindales	Eudicot
Melia azederach	Meliaceae	Sapindales	Eudicot
Sandoricum koetjape	Meliaceae	Sapindales	Eudicot
Toona sinensis	Meliaceae	Sapindales	Eudicot
Trichilia dregeana	Meliaceae	Sapindales	Eudicot
Dioscoreophyllum cumminsii	Menispermaceae	Ranunculales	Eudicot
Poraqueiba sericea	Metteniusaceae	Metteniusales	Eudicot
Poraqueiba paraensis	Metteniusaceae	Metteniusales	Eudicot
Artocarpus camansi	Moraceae	Rosales	Eudicot
Artocarpus heterophyllus	Moraceae	Rosales	Eudicot
Artocarpus hypargyreus	Moraceae	Rosales	Eudicot
Artocarpus integer	Moraceae	Rosales	Eudicot
Artocarpus lacucha	Moraceae	Rosales	Eudicot
Artocarpus lakoocha	Moraceae	Rosales	Eudicot
Artocarpus mariannensis	Moraceae	Rosales	Eudicot
Artocarpus sarawakensis	Moraceae	Rosales	Eudicot
Artocarpus sericicarpus	Moraceae	Rosales	Eudicot
Brosimum alicastrum	Moraceae	Rosales	Eudicot
Brosimum guianense	Moraceae	Rosales	Eudicot
Brosimum utile	Moraceae	Rosales	Eudicot
Broussonetia papyrifera	Moraceae	Rosales	Eudicot
Clarisia racemosa	Moraceae	Rosales	Eudicot
Cudrania tricuspidata	Moraceae	Rosales	Eudicot
Ficus auriculata	Moraceae	Rosales	Eudicot
Ficus carica	Moraceae	Rosales	Eudicot
Ficus coronata	Moraceae	Rosales	Eudicot
Ficus palmata	Moraceae	Rosales	Eudicot
Ficus racemosa	Moraceae	Rosales	Eudicot
Ficus sycomorus	Moraceae	Rosales	Eudicot
Helicostylis tomentosa	Moraceae	Rosales	Eudicot
Maclura cochinchinensis	Moraceae	Rosales	Eudicot
Maclura tinctoria	Moraceae	Rosales	Eudicot
Milicia excelsa	Moraceae	Rosales	Eudicot
Milicia regia	Moraceae	Rosales	Eudicot
Morus alba	Moraceae	Rosales	Eudicot
Morus australis	Moraceae	Rosales	Eudicot
Morus bombycis	Moraceae	Rosales	Eudicot
Morus cathayana	Moraceae	Rosales	Eudicot
Morus macroura	Moraceae	Rosales	Eudicot
Morus mesozygia	Moraceae	Rosales	Eudicot
Morus microphylla	Moraceae	Rosales	Eudicot
Morus mongolica	Moraceae	Rosales	Eudicot
Morus nigra	Moraceae	Rosales	Eudicot
Morus rubra	Moraceae	Rosales	Eudicot
Morus serrata	Moraceae	Rosales	Eudicot
Treculia africana	Moraceae	Rosales	Eudicot
Artocarpus altilis	Moraceae	Rosales	Eudicot
Bagassa guianensis	Moraceae	Rosales	Eudicot
Muntingia calabura	Muntingiaceae	Malvales	Eudicot
Myrica californica	Myricaceae	Fagales	Eudicot
Myrica cerifera	Myricaceae	Fagales	Eudicot
Myrica gale	Myricaceae	Fagales	Eudicot
Myrica heterophylla	Myricaceae	Fagales	Eudicot
Myrica nagi	Myricaceae	Fagales	Eudicot
Myrica pensylvanica	Myricaceae	Fagales	Eudicot
Myrica rubra	Myricaceae	Fagales	Eudicot
Acca sellowiana	Myrtaceae	Myrtales	Eudicot
Amomyrtus luma	Myrtaceae	Myrtales	Eudicot
Britoa acida	Myrtaceae	Myrtales	Eudicot
Campomanesia guaviroba	Myrtaceae	Myrtales	Eudicot
Campomanesia lineatifolia	Myrtaceae	Myrtales	Eudicot
Kunzea pomifera	Myrtaceae	Myrtales	Eudicot
Lophomyrtus bullata	Myrtaceae	Myrtales	Eudicot
Lophomyrtus x ralphii	Myrtaceae	Myrtales	Eudicot
Luma apiculata	Myrtaceae	Myrtales	Eudicot
Myrceugenia lanceolata	Myrtaceae	Myrtales	Eudicot
Myrcianthes pungens	Myrtaceae	Myrtales	Eudicot
Myrciaria dubia	Myrtaceae	Myrtales	Eudicot
Myrciaria floribunda	Myrtaceae	Myrtales	Eudicot
Myrciaria glazoviana	Myrtaceae	Myrtales	Eudicot
Myrciaria glomerata	Myrtaceae	Myrtales	Eudicot
Myrciaria tenella	Myrtaceae	Myrtales	Eudicot
Myrciaria vexator	Myrtaceae	Myrtales	Eudicot
Myrteola nummularia	Myrtaceae	Myrtales	Eudicot
Myrtus canescens	Myrtaceae	Myrtales	Eudicot
Myrtus communis	Myrtaceae	Myrtales	Eudicot
Myrtus tomentosa	Myrtaceae	Myrtales	Eudicot
Neomyrtus pedunculata	Myrtaceae	Myrtales	Eudicot
Plinia cauliflora	Myrtaceae	Myrtales	Eudicot
Plinia edulis	Myrtaceae	Myrtales	Eudicot
Pseudanamomis umbellulifera	Myrtaceae	Myrtales	Eudicot
Psidium acutangulum	Myrtaceae	Myrtales	Eudicot
Psidium araca	Myrtaceae	Myrtales	Eudicot
Psidium cattleyanum	Myrtaceae	Myrtales	Eudicot
Psidium friedrichsthalianum	Myrtaceae	Myrtales	Eudicot
Psidium guajava	Myrtaceae	Myrtales	Eudicot
Psidium guineense	Myrtaceae	Myrtales	Eudicot
Psidium guineensis	Myrtaceae	Myrtales	Eudicot
Psidium sartorianum	Myrtaceae	Myrtales	Eudicot
Rhodomyrtus tomentosa	Myrtaceae	Myrtales	Eudicot
Syzygium aromaticum	Myrtaceae	Myrtales	Eudicot
Syzygium cumini	Myrtaceae	Myrtales	Eudicot
Syzygium guineense	Myrtaceae	Myrtales	Eudicot
Syzygium jambos	Myrtaceae	Myrtales	Eudicot
Syzygium javanicum	Myrtaceae	Myrtales	Eudicot
Syzygium malaccensis	Myrtaceae	Myrtales	Eudicot
Syzygium paniculatum	Myrtaceae	Myrtales	Eudicot
Syzygium phillyreifolium	Myrtaceae	Myrtales	Eudicot
Ugni molinae	Myrtaceae	Myrtales	Eudicot
Eugenia patrisii	Myrtaceae	Myrtales	Eudicot
Myrcia fallax	Myrtaceae	Myrtales	Eudicot
Syzygium malaccense	Myrtaceae	Myrtales	Eudicot
Syzygium samarangense	Myrtaceae	Myrtales	Eudicot
Nitraria schoberi	Nitrariaceae	Sapindales	Eudicot
Nyssa aquatica	Nyssaceae	Cornales	Eudicot
Nyssa ogeche	Nyssaceae	Cornales	Eudicot
Nyssa sylvatica	Nyssaceae	Cornales	Eudicot
Lacunaria jenmanii	Ochnaceae	Malpighiales	Eudicot
Lophira alata	Ochnaceae	Malpighiales	Eudicot
Quiina florida	Ochnaceae	Malpighiales	Eudicot
Anacolosa frutescens	Olacaceae	Santanales	Eudicot
Ongokea gore	Olacaceae	Santanales	Eudicot
Ximenia americana	Olacaceae	Santanales	Eudicot
Chionanthus virginicus	Oleaceae	Lamiales	Eudicot
Forestiera acuminata	Oleaceae	Lamiales	Eudicot
Forestiera neomexicana	Oleaceae	Lamiales	Eudicot
Olea europaea	Oleaceae	Lamiales	Eudicot
Osmanthus americana	Oleaceae	Lamiales	Eudicot
Osmanthus fragrans	Oleaceae	Lamiales	Eudicot
Phillyrea latifolia	Oleaceae	Lamiales	Eudicot
Fuchsia boliviana	Onagraceae	Myrtales	Eudicot
Fuchsia coccinea	Onagraceae	Myrtales	Eudicot
Fuchsia colensoi	Onagraceae	Myrtales	Eudicot
Fuchsia corymbiflora	Onagraceae	Myrtales	Eudicot
Fuchsia denticulata	Onagraceae	Myrtales	Eudicot
Fuchsia excorticata	Onagraceae	Myrtales	Eudicot
Fuchsia fulgens	Onagraceae	Myrtales	Eudicot
Fuchsia hemsleyana	Onagraceae	Myrtales	Eudicot
Fuchsia magellanica	Onagraceae	Myrtales	Eudicot
Fuchsia microphylla	Onagraceae	Myrtales	Eudicot
Fuchsia paniculata	Onagraceae	Myrtales	Eudicot
Fuchsia procumbens	Onagraceae	Myrtales	Eudicot
Fuchsia splendens	Onagraceae	Myrtales	Eudicot
Agonandra brasiliensis	Opilinaceae	Santalales	Eudicot
Siphonostegia chinensis	Orobanchaceae	Lamiales	Eudicot
Averrhoa bilimbi	Oxalidaceae	Oxalidales	Eudicot
Averrhoa carambola	Oxalidaceae	Oxalidales	Eudicot
Passiflora actinia	Passifloraceae	Malpighiales	Eudicot
Passiflora alata	Passifloraceae	Malpighiales	Eudicot
Passiflora antioquiensis	Passifloraceae	Malpighiales	Eudicot
Passiflora caerulea	Passifloraceae	Malpighiales	Eudicot
Passiflora edulis	Passifloraceae	Malpighiales	Eudicot
Passiflora foetida	Passifloraceae	Malpighiales	Eudicot
Passiflora herbertiana	Passifloraceae	Malpighiales	Eudicot
Passiflora incarnata	Passifloraceae	Malpighiales	Eudicot
Passiflora incense	Passifloraceae	Malpighiales	Eudicot
Passiflora laurifolia	Passifloraceae	Malpighiales	Eudicot
Passiflora ligularis	Passifloraceae	Malpighiales	Eudicot
Passiflora maliformis	Passifloraceae	Malpighiales	Eudicot
Passiflora membranacea	Passifloraceae	Malpighiales	Eudicot
Passiflora mollisima	Passifloraceae	Malpighiales	Eudicot
Passiflora mollissima	Passifloraceae	Malpighiales	Eudicot
Passiflora pinnatistipula	Passifloraceae	Malpighiales	Eudicot
Passiflora popenovii	Passifloraceae	Malpighiales	Eudicot
Passiflora quadrangularis	Passifloraceae	Malpighiales	Eudicot
Passiflora tarminiana	Passifloraceae	Malpighiales	Eudicot
Passiflora tetrandra	Passifloraceae	Malpighiales	Eudicot
Passiflora tripartita	Passifloraceae	Malpighiales	Eudicot
Passiflora umbilicata	Passifloraceae	Malpighiales	Eudicot
Passiflora x exoniensis	Passifloraceae	Malpighiales	Eudicot
Passiflora nitida	Passifloraceae	Malpighiales	Eudicot
Pentadiplandra brazzeana	Pentadiplandraceae	Brassicales	Eudicot
Eurya chinensis	Pentaphylacaceae	Ericales	Eudicot
Antidesma bunius	Phyllanthaceae	Malpighiales	Eudicot
Antidesma dallachyanum	Phyllanthaceae	Malpighiales	Eudicot
Antidesma ghaesembilla	Phyllanthaceae	Malpighiales	Eudicot
Baccaurea dulcis	Phyllanthaceae	Malpighiales	Eudicot
Baccaurea macrocarpa	Phyllanthaceae	Malpighiales	Eudicot
Baccaurea motleyana	Phyllanthaceae	Malpighiales	Eudicot
Baccaurea racemosa	Phyllanthaceae	Malpighiales	Eudicot
Baccaurea rami ora	Phyllanthaceae	Malpighiales	Eudicot
Baccaurea ramiflora	Phyllanthaceae	Malpighiales	Eudicot
Baccaurea sapida	Phyllanthaceae	Malpighiales	Eudicot
Flueggea suffruticosa	Phyllanthaceae	Malpighiales	Eudicot
Phyllanthus acidus	Phyllanthaceae	Malpighiales	Eudicot
Phyllanthus distichus	Phyllanthaceae	Malpighiales	Eudicot
Phyllanthus emblica	Phyllanthaceae	Malpighiales	Eudicot
Sauropus androgynus	Phyllanthaceae	Malpighiales	Eudicot
Uapaca kirkiana	Phyllanthaceae	Malpighiales	Eudicot
Billardiera cymosa	Pittosporaceae	Apiales	Eudicot
Billardiera longiflora	Pittosporaceae	Apiales	Eudicot
Billardiera scandens	Pittosporaceae	Apiales	Eudicot
Pittosporum balansae	Pittosporaceae	Apiales	Eudicot
Hemiphragma heterophyllum	Plantaginaceae	Lamiales	Eudicot
Dacrycarpus dacrydioides	Podocarpaceae	Podocarpales	Eudicot
Dacrydium cupressinum	Podocarpaceae	Pinales	Eudicot
Microcachrys tetragona	Podocarpaceae	Podocarpales	Eudicot
Podocarpus alpinus	Podocarpaceae	Pinales	Eudicot
Podocarpus elatus	Podocarpaceae	Pinales	Eudicot
Podocarpus lawrencei	Podocarpaceae	Pinales	Eudicot
Podocarpus macrophyllus	Podocarpaceae	Pinales	Eudicot
Podocarpus neriifolius	Podocarpaceae	Pinales	Eudicot
Podocarpus nivalis	Podocarpaceae	Pinales	Eudicot
Podocarpus nubigenus	Podocarpaceae	Pinales	Eudicot
Podocarpus salignus	Podocarpaceae	Pinales	Eudicot
Podocarpus totara	Podocarpaceae	Pinales	Eudicot
Prumnopitys andina	Podocarpaceae	Podocarpales	Eudicot
Prumnopitys ferruginea	Podocarpaceae	Podocarpales	Eudicot
Prumnopitys taxifolia	Podocarpaceae	Podocarpales	Eudicot
Moutabea chodatiana	Polygalaceae	Caryophyllales	Eudicot
Calligonum aphyllum	Polygonaceae	Caryophyllales	Eudicot
Coccoloba caracasana	Polygonaceae	Caryophyllales	Eudicot
Coccoloba uvifera	Polygonaceae	Caryophyllales	Eudicot
Muehlenbeckia adpressa	Polygonaceae	Caryophyllales	Eudicot
Muehlenbeckia astonii	Polygonaceae	Caryophyllales	Eudicot
Muehlenbeckia australis	Polygonaceae	Caryophyllales	Eudicot
Muehlenbeckia axillaris	Polygonaceae	Caryophyllales	Eudicot
Muehlenbeckia chilensis	Polygonaceae	Caryophyllales	Eudicot
Muehlenbeckia complexa	Polygonaceae	Caryophyllales	Eudicot
Ardisia panurensis	Primulaceae	Ericales	Eudicot
Embelia ribes	Primulaceae	Ericales	Eudicot
Myrsine africana	Primulaceae	Ericales	Eudicot
Myrsine semiserrata	Primulaceae	Ericales	Eudicot
Macadamia integrifolia	Proteaceae	Proteales	Eudicot
Macadamia tetraphylla	Proteaceae	Proteales	Eudicot
Persoonia acerosa	Proteaceae	Proteales	Eudicot
Persoonia arborea	Proteaceae	Proteales	Eudicot
Persoonia chamaepeuce	Proteaceae	Proteales	Eudicot
Persoonia curvifolia	Proteaceae	Proteales	Eudicot
Persoonia fastigiata	Proteaceae	Proteales	Eudicot
Persoonia gunnii	Proteaceae	Proteales	Eudicot
Persoonia juniperina	Proteaceae	Proteales	Eudicot
Persoonia levis	Proteaceae	Proteales	Eudicot
Persoonia linearis	Proteaceae	Proteales	Eudicot
Persoonia mollis	Proteaceae	Proteales	Eudicot
Persoonia oxycocceoides	Proteaceae	Proteales	Eudicot
Persoonia pinifolia	Proteaceae	Proteales	Eudicot
Persoonia rigida	Proteaceae	Proteales	Eudicot
Persoonia subvelutina	Proteaceae	Proteales	Eudicot
Berchemia flavescens	Rhamnaceae	Rosales	Eudicot
Berchemia lineata	Rhamnaceae	Rosales	Eudicot
Berchemia racemosa	Rhamnaceae	Rosales	Eudicot
Ceanothus fendleri	Rhamnaceae	Rosales	Eudicot
Hovenia dulcis	Rhamnaceae	Rosales	Eudicot
Paliurus spina-christi	Rhamnaceae	Rosales	Eudicot
Rhamnella franguloides	Rhamnaceae	Rosales	Eudicot
Rhamnus carolinianus	Rhamnaceae	Rosales	Eudicot
Rhamnus croceus	Rhamnaceae	Rosales	Eudicot
Rhamnus nepalensis	Rhamnaceae	Rosales	Eudicot
Rhamnus persicus	Rhamnaceae	Rosales	Eudicot
Ziziphus jujuba	Rhamnaceae	Rosales	Eudicot
Ziziphus mauritiana	Rhamnaceae	Rosales	Eudicot
Ziziphus nummularia	Rhamnaceae	Rosales	Eudicot
Amelanchier alnifolia	Rosaceae	Rosales	Eudicot
Amelanchier arborea	Rosaceae	Rosales	Eudicot
Amelanchier asiatica	Rosaceae	Rosales	Eudicot
Amelanchier bartramiana	Rosaceae	Rosales	Eudicot
Amelanchier basalticola	Rosaceae	Rosales	Eudicot
Amelanchier canadensis	Rosaceae	Rosales	Eudicot
Amelanchier confusa	Rosaceae	Rosales	Eudicot
Amelanchier humilis	Rosaceae	Rosales	Eudicot
Amelanchier huroensis	Rosaceae	Rosales	Eudicot
Amelanchier interior	Rosaceae	Rosales	Eudicot
Amelanchier intermedia	Rosaceae	Rosales	Eudicot
Amelanchier laevis	Rosaceae	Rosales	Eudicot
Amelanchier lamarckii	Rosaceae	Rosales	Eudicot
Amelanchier obovalis	Rosaceae	Rosales	Eudicot
Amelanchier ovalis	Rosaceae	Rosales	Eudicot
Amelanchier pallida	Rosaceae	Rosales	Eudicot
Amelanchier parviflora	Rosaceae	Rosales	Eudicot
Amelanchier sanguinea	Rosaceae	Rosales	Eudicot
Amelanchier spicata	Rosaceae	Rosales	Eudicot
Amelanchier stolonifera	Rosaceae	Rosales	Eudicot
Amelanchier utahensis	Rosaceae	Rosales	Eudicot
Amelanchier weigandii	Rosaceae	Rosales	Eudicot
Amelanchier x grandiflora	Rosaceae	Rosales	Eudicot
Amelasorbus jackii	Rosaceae	Rosales	Eudicot
Aronia arbutifolia	Rosaceae	Rosales	Eudicot
Aronia melanocarpa	Rosaceae	Rosales	Eudicot
Aronia prunifolia	Rosaceae	Rosales	Eudicot
Chaenomeles cathayensis	Rosaceae	Rosales	Eudicot
Chaenomeles japonica	Rosaceae	Rosales	Eudicot
Chaenomeles sinensis	Rosaceae	Rosales	Eudicot
Chaenomeles speciosa	Rosaceae	Rosales	Eudicot
Chaenomeles x superba	Rosaceae	Rosales	Eudicot
Cotoneaster microphyllus	Rosaceae	Rosales	Eudicot
Crataegomespilus dardarii	Rosaceae	Rosales	Eudicot
Crataegus acclivis	Rosaceae	Rosales	Eudicot
Crataegus aestivalis	Rosaceae	Rosales	Eudicot
Crataegus anomala	Rosaceae	Rosales	Eudicot
Crataegus apiifolia	Rosaceae	Rosales	Eudicot
Crataegus aprica	Rosaceae	Rosales	Eudicot
Crataegus armena	Rosaceae	Rosales	Eudicot
Crataegus arnoldiana	Rosaceae	Rosales	Eudicot
Crataegus atrosanguinea	Rosaceae	Rosales	Eudicot
Crataegus azarolus	Rosaceae	Rosales	Eudicot
Crataegus baroussana	Rosaceae	Rosales	Eudicot
Crataegus caesa	Rosaceae	Rosales	Eudicot
Crataegus calpodendron	Rosaceae	Rosales	Eudicot
Crataegus canadensis	Rosaceae	Rosales	Eudicot
Crataegus canbyi	Rosaceae	Rosales	Eudicot
Crataegus champlainensis	Rosaceae	Rosales	Eudicot
Crataegus chlorosarca	Rosaceae	Rosales	Eudicot
Crataegus chrysocarpa	Rosaceae	Rosales	Eudicot
Crataegus coccinoides	Rosaceae	Rosales	Eudicot
Crataegus columbiana	Rosaceae	Rosales	Eudicot
Crataegus crus-galli	Rosaceae	Rosales	Eudicot
Crataegus cuneata	Rosaceae	Rosales	Eudicot
Crataegus dilatata	Rosaceae	Rosales	Eudicot
Crataegus dispessa	Rosaceae	Rosales	Eudicot
Crataegus douglasii	Rosaceae	Rosales	Eudicot
Crataegus durobrivensis	Rosaceae	Rosales	Eudicot
Crataegus ellwangeriana	Rosaceae	Rosales	Eudicot
Crataegus elongata	Rosaceae	Rosales	Eudicot
Crataegus festiva	Rosaceae	Rosales	Eudicot
Crataegus flabellata	Rosaceae	Rosales	Eudicot
Crataegus flava	Rosaceae	Rosales	Eudicot
Crataegus gemosa	Rosaceae	Rosales	Eudicot
Crataegus heterophylla	Rosaceae	Rosales	Eudicot
Crataegus holmesiana	Rosaceae	Rosales	Eudicot
Crataegus hupehensis	Rosaceae	Rosales	Eudicot
Crataegus illinoiensis	Rosaceae	Rosales	Eudicot
Crataegus intricata	Rosaceae	Rosales	Eudicot
Crataegus jackii	Rosaceae	Rosales	Eudicot
Crataegus jonesiae	Rosaceae	Rosales	Eudicot
Crataegus laciniata	Rosaceae	Rosales	Eudicot
Crataegus laevigata	Rosaceae	Rosales	Eudicot
Crataegus lobulata	Rosaceae	Rosales	Eudicot
Crataegus macrosperma	Rosaceae	Rosales	Eudicot
Crataegus maximowiczii	Rosaceae	Rosales	Eudicot
Crataegus meyeri	Rosaceae	Rosales	Eudicot
Crataegus missouriensis	Rosaceae	Rosales	Eudicot
Crataegus mollis	Rosaceae	Rosales	Eudicot
Crataegus monogyna	Rosaceae	Rosales	Eudicot
Crataegus nigra	Rosaceae	Rosales	Eudicot
Crataegus opaca	Rosaceae	Rosales	Eudicot
Crataegus orientalis	Rosaceae	Rosales	Eudicot
Crataegus parvifolia	Rosaceae	Rosales	Eudicot
Crataegus pedicellata	Rosaceae	Rosales	Eudicot
Crataegus pentagyna	Rosaceae	Rosales	Eudicot
Crataegus phaenopyrum	Rosaceae	Rosales	Eudicot
Crataegus pinnatifida	Rosaceae	Rosales	Eudicot
Crataegus pinnatifida major	Rosaceae	Rosales	Eudicot
Crataegus pontica	Rosaceae	Rosales	Eudicot
Crataegus pringlei	Rosaceae	Rosales	Eudicot
Crataegus pruinosa	Rosaceae	Rosales	Eudicot
Crataegus pubescens	Rosaceae	Rosales	Eudicot
Crataegus punctata	Rosaceae	Rosales	Eudicot
Crataegus reverchonii	Rosaceae	Rosales	Eudicot
Crataegus rivularis	Rosaceae	Rosales	Eudicot
Crataegus rotundifolia	Rosaceae	Rosales	Eudicot
Crataegus sanguinea	Rosaceae	Rosales	Eudicot
Crataegus songorica	Rosaceae	Rosales	Eudicot
Crataegus stipulosa	Rosaceae	Rosales	Eudicot
Crataegus submollis	Rosaceae	Rosales	Eudicot
Crataegus subvillosa	Rosaceae	Rosales	Eudicot
Crataegus succulenta	Rosaceae	Rosales	Eudicot
Crataegus szovitskii	Rosaceae	Rosales	Eudicot
Crataegus tanacetifolia	Rosaceae	Rosales	Eudicot
Crataegus uniflora	Rosaceae	Rosales	Eudicot
Crataegus x grignonensis	Rosaceae	Rosales	Eudicot
Cydonia oblonga	Rosaceae	Rosales	Eudicot
Docynia delavayi	Rosaceae	Rosales	Eudicot
Docynia indica	Rosaceae	Rosales	Eudicot
Duchesnea chrysantha	Rosaceae	Rosales	Eudicot
Duchesnea filipendula	Rosaceae	Rosales	Eudicot
Duchesnea indica	Rosaceae	Rosales	Eudicot
Eriobotrya japonica	Rosaceae	Rosales	Eudicot
Fragaria ananassa	Rosaceae	Rosales	Eudicot
Fragaria bracteata	Rosaceae	Rosales	Eudicot
Fragaria californica	Rosaceae	Rosales	Eudicot
Fragaria chiloensis	Rosaceae	Rosales	Eudicot
Fragaria daltoniana	Rosaceae	Rosales	Eudicot
Fragaria iinumae	Rosaceae	Rosales	Eudicot
Fragaria moschata	Rosaceae	Rosales	Eudicot
Fragaria nilgerrensis	Rosaceae	Rosales	Eudicot
Fragaria nipponica	Rosaceae	Rosales	Eudicot
Fragaria nubicola	Rosaceae	Rosales	Eudicot
Fragaria orientalis	Rosaceae	Rosales	Eudicot
Fragaria ovalis	Rosaceae	Rosales	Eudicot
Fragaria vesca	Rosaceae	Rosales	Eudicot
Fragaria virginiana	Rosaceae	Rosales	Eudicot
Fragaria viridis	Rosaceae	Rosales	Eudicot
Holodiscus discolor	Rosaceae	Rosales	Eudicot
Holodiscus dumosus	Rosaceae	Rosales	Eudicot
Malus angustifolia	Rosaceae	Rosales	Eudicot
Malus asiatica	Rosaceae	Rosales	Eudicot
Malus baccata	Rosaceae	Rosales	Eudicot
Malus bracteata	Rosaceae	Rosales	Eudicot
Malus brevipes	Rosaceae	Rosales	Eudicot
Malus coronaria	Rosaceae	Rosales	Eudicot
Malus domestica	Rosaceae	Rosales	Eudicot
Malus florentina	Rosaceae	Rosales	Eudicot
Malus floribunda	Rosaceae	Rosales	Eudicot
Malus fusca	Rosaceae	Rosales	Eudicot
Malus glabrata	Rosaceae	Rosales	Eudicot
Malus glaucescens	Rosaceae	Rosales	Eudicot
Malus halliana	Rosaceae	Rosales	Eudicot
Malus hupehensis	Rosaceae	Rosales	Eudicot
Malus ioensis	Rosaceae	Rosales	Eudicot
Malus kansuensis	Rosaceae	Rosales	Eudicot
Malus lancifolia	Rosaceae	Rosales	Eudicot
Malus micromalus	Rosaceae	Rosales	Eudicot
Malus praecox	Rosaceae	Rosales	Eudicot
Malus prattii	Rosaceae	Rosales	Eudicot
Malus prunifolia	Rosaceae	Rosales	Eudicot
Malus pumila	Rosaceae	Rosales	Eudicot
Malus pumila nervosa	Rosaceae	Rosales	Eudicot
Malus pumila paradisiaca	Rosaceae	Rosales	Eudicot
Malus sargentii	Rosaceae	Rosales	Eudicot
Malus sieboldii	Rosaceae	Rosales	Eudicot
Malus sieversii	Rosaceae	Rosales	Eudicot
Malus sikkimensis	Rosaceae	Rosales	Eudicot
Malus spectabilis	Rosaceae	Rosales	Eudicot
Malus sylvestris	Rosaceae	Rosales	Eudicot
Malus toringo	Rosaceae	Rosales	Eudicot
Malus toringoides	Rosaceae	Rosales	Eudicot
Malus transitoria	Rosaceae	Rosales	Eudicot
Malus trilobata	Rosaceae	Rosales	Eudicot
Malus tschonoskii	Rosaceae	Rosales	Eudicot
Malus turkmenorum	Rosaceae	Rosales	Eudicot
Malus x adstringens	Rosaceae	Rosales	Eudicot
Malus x astracanica	Rosaceae	Rosales	Eudicot
Malus x micromalus	Rosaceae	Rosales	Eudicot
Malus x robusta	Rosaceae	Rosales	Eudicot
Malus x soulardii	Rosaceae	Rosales	Eudicot
Malus yunnanensis	Rosaceae	Rosales	Eudicot
Margyricarpus pinnatus	Rosaceae	Rosales	Eudicot
Mespilus germanica	Rosaceae	Rosales	Eudicot
Neillia thyrsiflora	Rosaceae	Rosales	Eudicot
Oemleria cerasiformis	Rosaceae	Rosales	Eudicot
Osteomeles obtusifolia	Rosaceae	Rosales	Eudicot
Osteomeles schwerinae	Rosaceae	Rosales	Eudicot
Osteomeles subrotunda	Rosaceae	Rosales	Eudicot
Peraphyllum ramosissimum	Rosaceae	Rosales	Eudicot
Photinia arbutifolia	Rosaceae	Rosales	Eudicot
Photinia arguta	Rosaceae	Rosales	Eudicot
Photinia bodinieri	Rosaceae	Rosales	Eudicot
Photinia glabra	Rosaceae	Rosales	Eudicot
Photinia parvifolia	Rosaceae	Rosales	Eudicot
Photinia villosa	Rosaceae	Rosales	Eudicot
Pirocydonia danielii	Rosaceae	Rosales	Eudicot
Prinsepia sinensis	Rosaceae	Rosales	Eudicot
Prinsepia uniflora	Rosaceae	Rosales	Eudicot
Prinsepia utilis	Rosaceae	Rosales	Eudicot
Prunus alabamensis	Rosaceae	Rosales	Eudicot
Prunus alleghaniensis	Rosaceae	Rosales	Eudicot
Prunus americana	Rosaceae	Rosales	Eudicot
Prunus americana lanata	Rosaceae	Rosales	Eudicot
Prunus andersonii	Rosaceae	Rosales	Eudicot
Prunus angustifolia	Rosaceae	Rosales	Eudicot
Prunus apetala	Rosaceae	Rosales	Eudicot
Prunus arabica	Rosaceae	Rosales	Eudicot
Prunus armeniaca	Rosaceae	Rosales	Eudicot
Prunus avium	Rosaceae	Rosales	Eudicot
Prunus besseriana	Rosaceae	Rosales	Eudicot
Prunus besseyi	Rosaceae	Rosales	Eudicot
Prunus bifrons	Rosaceae	Rosales	Eudicot
Prunus bokharensis	Rosaceae	Rosales	Eudicot
Prunus brigantina	Rosaceae	Rosales	Eudicot
Prunus buergeriana	Rosaceae	Rosales	Eudicot
Prunus campanulata	Rosaceae	Rosales	Eudicot
Prunus canescens	Rosaceae	Rosales	Eudicot
Prunus cantabrigiensis	Rosaceae	Rosales	Eudicot
Prunus capsica	Rosaceae	Rosales	Eudicot
Prunus caroliniana	Rosaceae	Rosales	Eudicot
Prunus cerasifera	Rosaceae	Rosales	Eudicot
Prunus cerasoides	Rosaceae	Rosales	Eudicot
Prunus cerasus	Rosaceae	Rosales	Eudicot
Prunus chicasa	Rosaceae	Rosales	Eudicot
Prunus cocomilia	Rosaceae	Rosales	Eudicot
Prunus consociiflora	Rosaceae	Rosales	Eudicot
Prunus cornuta	Rosaceae	Rosales	Eudicot
Prunus cortapico	Rosaceae	Rosales	Eudicot
Prunus davidiana	Rosaceae	Rosales	Eudicot
Prunus dawyckensis	Rosaceae	Rosales	Eudicot
Prunus dielsiana	Rosaceae	Rosales	Eudicot
Prunus domestica	Rosaceae	Rosales	Eudicot
Prunus dulcis	Rosaceae	Rosales	Eudicot
Prunus emarginata	Rosaceae	Rosales	Eudicot
Prunus fasciculata	Rosaceae	Rosales	Eudicot
Prunus fenzliana	Rosaceae	Rosales	Eudicot
Prunus fruticosa	Rosaceae	Rosales	Eudicot
Prunus glandulosa	Rosaceae	Rosales	Eudicot
Prunus gracilis	Rosaceae	Rosales	Eudicot
Prunus grayana	Rosaceae	Rosales	Eudicot
Prunus gymnodonta	Rosaceae	Rosales	Eudicot
Prunus hortulana	Rosaceae	Rosales	Eudicot
Prunus humilis	Rosaceae	Rosales	Eudicot
Prunus ilicifolia	Rosaceae	Rosales	Eudicot
Prunus incana	Rosaceae	Rosales	Eudicot
Prunus incisa	Rosaceae	Rosales	Eudicot
Prunus insititia	Rosaceae	Rosales	Eudicot
Prunus iranica	Rosaceae	Rosales	Eudicot
Prunus jamasakura	Rosaceae	Rosales	Eudicot
Prunus japonica	Rosaceae	Rosales	Eudicot
Prunus jenkinsii	Rosaceae	Rosales	Eudicot
Prunus kansuensis	Rosaceae	Rosales	Eudicot
Prunus lannesiana	Rosaceae	Rosales	Eudicot
Prunus laurocerasus	Rosaceae	Rosales	Eudicot
Prunus lusitanica	Rosaceae	Rosales	Eudicot
Prunus lyonii	Rosaceae	Rosales	Eudicot
Prunus mahaleb	Rosaceae	Rosales	Eudicot
Prunus maritima	Rosaceae	Rosales	Eudicot
Prunus maximowiczii	Rosaceae	Rosales	Eudicot
Prunus media	Rosaceae	Rosales	Eudicot
Prunus mexicana	Rosaceae	Rosales	Eudicot
Prunus microcarpa	Rosaceae	Rosales	Eudicot
Prunus mira	Rosaceae	Rosales	Eudicot
Prunus mume	Rosaceae	Rosales	Eudicot
Prunus munsoniana	Rosaceae	Rosales	Eudicot
Prunus napaulensis	Rosaceae	Rosales	Eudicot
Prunus nigra	Rosaceae	Rosales	Eudicot
Prunus nipponica	Rosaceae	Rosales	Eudicot
Prunus orthosepala	Rosaceae	Rosales	Eudicot
Prunus padus	Rosaceae	Rosales	Eudicot
Prunus pedunculata	Rosaceae	Rosales	Eudicot
Prunus pensylvanica	Rosaceae	Rosales	Eudicot
Prunus persica	Rosaceae	Rosales	Eudicot
Prunus pilosiuscula	Rosaceae	Rosales	Eudicot
Prunus prostrata	Rosaceae	Rosales	Eudicot
Prunus pseudocerasus	Rosaceae	Rosales	Eudicot
Prunus pumila	Rosaceae	Rosales	Eudicot
Prunus rivularis	Rosaceae	Rosales	Eudicot
Prunus rufa	Rosaceae	Rosales	Eudicot
Prunus salicifolia	Rosaceae	Rosales	Eudicot
Prunus salicina	Rosaceae	Rosales	Eudicot
Prunus sargentii	Rosaceae	Rosales	Eudicot
Prunus serotina	Rosaceae	Rosales	Eudicot
Prunus serrula	Rosaceae	Rosales	Eudicot
Prunus serrulata	Rosaceae	Rosales	Eudicot
Prunus sibirica	Rosaceae	Rosales	Eudicot
Prunus simonii	Rosaceae	Rosales	Eudicot
Prunus sogdiana	Rosaceae	Rosales	Eudicot
Prunus spinosa	Rosaceae	Rosales	Eudicot
Prunus ssiori	Rosaceae	Rosales	Eudicot
Prunus subcordata	Rosaceae	Rosales	Eudicot
Prunus subhirtella	Rosaceae	Rosales	Eudicot
Prunus takesimensis	Rosaceae	Rosales	Eudicot
Prunus tangutica	Rosaceae	Rosales	Eudicot
Prunus tenella	Rosaceae	Rosales	Eudicot
Prunus tomentosa	Rosaceae	Rosales	Eudicot
Prunus triloba	Rosaceae	Rosales	Eudicot
Prunus umbellata	Rosaceae	Rosales	Eudicot
Prunus undulata	Rosaceae	Rosales	Eudicot
Prunus ursina	Rosaceae	Rosales	Eudicot
Prunus ussuriensis	Rosaceae	Rosales	Eudicot
Prunus virens	Rosaceae	Rosales	Eudicot
Prunus virginiana	Rosaceae	Rosales	Eudicot
Prunus x cistena	Rosaceae	Rosales	Eudicot
Prunus x dasycarpa	Rosaceae	Rosales	Eudicot
Prunus x eminens	Rosaceae	Rosales	Eudicot
Prunus x fontanesiana	Rosaceae	Rosales	Eudicot
Prunus x gondouinii	Rosaceae	Rosales	Eudicot
Prunus x sultana	Rosaceae	Rosales	Eudicot
Prunus x utahensis	Rosaceae	Rosales	Eudicot
Prunus x yedoensis	Rosaceae	Rosales	Eudicot
Pyracantha angustifolia	Rosaceae	Rosales	Eudicot
Pyracantha coccinea	Rosaceae	Rosales	Eudicot
Pyracantha crenato-serrata	Rosaceae	Rosales	Eudicot
Pyracantha crenulata	Rosaceae	Rosales	Eudicot
Pyracantha koidzumii	Rosaceae	Rosales	Eudicot
Pyronia veitchii	Rosaceae	Rosales	Eudicot
Pyrus acidula	Rosaceae	Rosales	Eudicot
Pyrus amygdaliformis	Rosaceae	Rosales	Eudicot
Pyrus autumnalis	Rosaceae	Rosales	Eudicot
Pyrus balsanae	Rosaceae	Rosales	Eudicot
Pyrus betulaefolia	Rosaceae	Rosales	Eudicot
Pyrus bretschneideri	Rosaceae	Rosales	Eudicot
Pyrus calleryana	Rosaceae	Rosales	Eudicot
Pyrus communis	Rosaceae	Rosales	Eudicot
Pyrus cordata	Rosaceae	Rosales	Eudicot
Pyrus elaeagnifolia	Rosaceae	Rosales	Eudicot
Pyrus faurei	Rosaceae	Rosales	Eudicot
Pyrus glabra	Rosaceae	Rosales	Eudicot
Pyrus macrostipes	Rosaceae	Rosales	Eudicot
Pyrus maximowicziana	Rosaceae	Rosales	Eudicot
Pyrus nivalis	Rosaceae	Rosales	Eudicot
Pyrus pashia	Rosaceae	Rosales	Eudicot
Pyrus persica	Rosaceae	Rosales	Eudicot
Pyrus phaeocarpa	Rosaceae	Rosales	Eudicot
Pyrus prematura	Rosaceae	Rosales	Eudicot
Pyrus pyraster	Rosaceae	Rosales	Eudicot
Pyrus pyrifolia	Rosaceae	Rosales	Eudicot
Pyrus regellii	Rosaceae	Rosales	Eudicot
Pyrus salicifolia	Rosaceae	Rosales	Eudicot
Pyrus serrulata	Rosaceae	Rosales	Eudicot
Pyrus sohayakiensis	Rosaceae	Rosales	Eudicot
Pyrus syriaca	Rosaceae	Rosales	Eudicot
Pyrus turcomanica	Rosaceae	Rosales	Eudicot
Pyrus ussuriensis	Rosaceae	Rosales	Eudicot
Pyrus x lecontei	Rosaceae	Rosales	Eudicot
Pyrus x salvifolia	Rosaceae	Rosales	Eudicot
Rhaphiolepis indica	Rosaceae	Rosales	Eudicot
Rosa acicularis	Rosaceae	Rosales	Eudicot
Rosa arkansana	Rosaceae	Rosales	Eudicot
Rosa banksiae	Rosaceae	Rosales	Eudicot
Rosa blanda	Rosaceae	Rosales	Eudicot
Rosa californica	Rosaceae	Rosales	Eudicot
Rosa canina	Rosaceae	Rosales	Eudicot
Rosa carolina	Rosaceae	Rosales	Eudicot
Rosa centifolia	Rosaceae	Rosales	Eudicot
Rosa chinensis	Rosaceae	Rosales	Eudicot
Rosa coriifolia	Rosaceae	Rosales	Eudicot
Rosa corymbifera	Rosaceae	Rosales	Eudicot
Rosa cymosa	Rosaceae	Rosales	Eudicot
Rosa davurica	Rosaceae	Rosales	Eudicot
Rosa dumalis	Rosaceae	Rosales	Eudicot
Rosa fedtschenkoana	Rosaceae	Rosales	Eudicot
Rosa fraxinellaefolia	Rosaceae	Rosales	Eudicot
Rosa gigantea	Rosaceae	Rosales	Eudicot
Rosa glauca	Rosaceae	Rosales	Eudicot
Rosa gymnocarpa	Rosaceae	Rosales	Eudicot
Rosa hemsleyana	Rosaceae	Rosales	Eudicot
Rosa laevigata	Rosaceae	Rosales	Eudicot
Rosa laxa	Rosaceae	Rosales	Eudicot
Rosa macrophylla	Rosaceae	Rosales	Eudicot
Rosa majalis	Rosaceae	Rosales	Eudicot
Rosa manca	Rosaceae	Rosales	Eudicot
Rosa maracandica	Rosaceae	Rosales	Eudicot
Rosa micrantha	Rosaceae	Rosales	Eudicot
Rosa moschata	Rosaceae	Rosales	Eudicot
Rosa moyesii	Rosaceae	Rosales	Eudicot
Rosa multiflora	Rosaceae	Rosales	Eudicot
Rosa nutkana	Rosaceae	Rosales	Eudicot
Rosa obtusifolia	Rosaceae	Rosales	Eudicot
Rosa pimpinellifolia	Rosaceae	Rosales	Eudicot
Rosa pisocarpa	Rosaceae	Rosales	Eudicot
Rosa roxburghii	Rosaceae	Rosales	Eudicot
Rosa rubiginosa	Rosaceae	Rosales	Eudicot
Rosa rugosa	Rosaceae	Rosales	Eudicot
Rosa sericea	Rosaceae	Rosales	Eudicot
Rosa setipoda	Rosaceae	Rosales	Eudicot
Rosa sherardii	Rosaceae	Rosales	Eudicot
Rosa sweginzowii	Rosaceae	Rosales	Eudicot
Rosa tomentosa	Rosaceae	Rosales	Eudicot
Rosa villosa	Rosaceae	Rosales	Eudicot
Rosa virginiana	Rosaceae	Rosales	Eudicot
Rosa webbiana	Rosaceae	Rosales	Eudicot
Rosa wichuraiana	Rosaceae	Rosales	Eudicot
Rosa woodsii	Rosaceae	Rosales	Eudicot
Rosa x beanii	Rosaceae	Rosales	Eudicot
Rosa x damascena	Rosaceae	Rosales	Eudicot
Rosa x odorata	Rosaceae	Rosales	Eudicot
Rubus abbrevians	Rosaceae	Rosales	Eudicot
Rubus acaulis	Rosaceae	Rosales	Eudicot
Rubus acer	Rosaceae	Rosales	Eudicot
Rubus adenophorus	Rosaceae	Rosales	Eudicot
Rubus adenotrichus	Rosaceae	Rosales	Eudicot
Rubus affinis	Rosaceae	Rosales	Eudicot
Rubus alexeterius	Rosaceae	Rosales	Eudicot
Rubus allegheniensis	Rosaceae	Rosales	Eudicot
Rubus almus	Rosaceae	Rosales	Eudicot
Rubus amabilis	Rosaceae	Rosales	Eudicot
Rubus ampelinus	Rosaceae	Rosales	Eudicot
Rubus arcticus	Rosaceae	Rosales	Eudicot
Rubus argutus	Rosaceae	Rosales	Eudicot
Rubus arizonicus	Rosaceae	Rosales	Eudicot
Rubus australis	Rosaceae	Rosales	Eudicot
Rubus avipes	Rosaceae	Rosales	Eudicot
Rubus baileyanus	Rosaceae	Rosales	Eudicot
Rubus barbatus	Rosaceae	Rosales	Eudicot
Rubus bellobatus	Rosaceae	Rosales	Eudicot
Rubus biflorus	Rosaceae	Rosales	Eudicot
Rubus bifrons	Rosaceae	Rosales	Eudicot
Rubus bloxamii	Rosaceae	Rosales	Eudicot
Rubus brasiliensis	Rosaceae	Rosales	Eudicot
Rubus buergeri	Rosaceae	Rosales	Eudicot
Rubus caesius	Rosaceae	Rosales	Eudicot
Rubus calycinus	Rosaceae	Rosales	Eudicot
Rubus canadensis	Rosaceae	Rosales	Eudicot
Rubus candicans	Rosaceae	Rosales	Eudicot
Rubus caucasicus	Rosaceae	Rosales	Eudicot
Rubus caudatus	Rosaceae	Rosales	Eudicot
Rubus chamaemorus	Rosaceae	Rosales	Eudicot
Rubus chroosepalus	Rosaceae	Rosales	Eudicot
Rubus cissoides	Rosaceae	Rosales	Eudicot
Rubus cockburnianus	Rosaceae	Rosales	Eudicot
Rubus corchorifolius	Rosaceae	Rosales	Eudicot
Rubus coreanus	Rosaceae	Rosales	Eudicot
Rubus corylifolius	Rosaceae	Rosales	Eudicot
Rubus crataegifolius	Rosaceae	Rosales	Eudicot
Rubus croceanthus	Rosaceae	Rosales	Eudicot
Rubus cuneifolius	Rosaceae	Rosales	Eudicot
Rubus deliciosus	Rosaceae	Rosales	Eudicot
Rubus divergens	Rosaceae	Rosales	Eudicot
Rubus ellipticus	Rosaceae	Rosales	Eudicot
Rubus enslenii	Rosaceae	Rosales	Eudicot
Rubus eriocarpus	Rosaceae	Rosales	Eudicot
Rubus flagellaris	Rosaceae	Rosales	Eudicot
Rubus flagelliflorus	Rosaceae	Rosales	Eudicot
Rubus floribundo-paniculatus	Rosaceae	Rosales	Eudicot
Rubus floridus	Rosaceae	Rosales	Eudicot
Rubus flosculosus	Rosaceae	Rosales	Eudicot
Rubus frondosus	Rosaceae	Rosales	Eudicot
Rubus fruticosus	Rosaceae	Rosales	Eudicot
Rubus geoides	Rosaceae	Rosales	Eudicot
Rubus geophilus	Rosaceae	Rosales	Eudicot
Rubus glandicaulis	Rosaceae	Rosales	Eudicot
Rubus glaucus	Rosaceae	Rosales	Eudicot
Rubus grayanus	Rosaceae	Rosales	Eudicot
Rubus gunnianus	Rosaceae	Rosales	Eudicot
Rubus henryi	Rosaceae	Rosales	Eudicot
Rubus hirsutus	Rosaceae	Rosales	Eudicot
Rubus hispidus	Rosaceae	Rosales	Eudicot
Rubus humilifolius	Rosaceae	Rosales	Eudicot
Rubus hypargyrus niveus	Rosaceae	Rosales	Eudicot
Rubus ichangensis	Rosaceae	Rosales	Eudicot
Rubus idaeus	Rosaceae	Rosales	Eudicot
Rubus ikenoensis	Rosaceae	Rosales	Eudicot
Rubus illecebrosus	Rosaceae	Rosales	Eudicot
Rubus innominatus	Rosaceae	Rosales	Eudicot
Rubus invisus	Rosaceae	Rosales	Eudicot
Rubus jacens	Rosaceae	Rosales	Eudicot
Rubus kuntzeanus	Rosaceae	Rosales	Eudicot
Rubus laciniatus	Rosaceae	Rosales	Eudicot
Rubus lambertianus	Rosaceae	Rosales	Eudicot
Rubus lanatus	Rosaceae	Rosales	Eudicot
Rubus lasiostylus	Rosaceae	Rosales	Eudicot
Rubus laudatus	Rosaceae	Rosales	Eudicot
Rubus lemurum	Rosaceae	Rosales	Eudicot
Rubus lentiginosus	Rosaceae	Rosales	Eudicot
Rubus leucodermis	Rosaceae	Rosales	Eudicot
Rubus leucostachys	Rosaceae	Rosales	Eudicot
Rubus lineatus	Rosaceae	Rosales	Eudicot
Rubus linkianus	Rosaceae	Rosales	Eudicot
Rubus loganobaccus	Rosaceae	Rosales	Eudicot
Rubus louisianus	Rosaceae	Rosales	Eudicot
Rubus macilentus	Rosaceae	Rosales	Eudicot
Rubus macropetalus	Rosaceae	Rosales	Eudicot
Rubus magnificus	Rosaceae	Rosales	Eudicot
Rubus mesogaeus	Rosaceae	Rosales	Eudicot
Rubus michiganensis	Rosaceae	Rosales	Eudicot
Rubus microphyllus	Rosaceae	Rosales	Eudicot
Rubus moluccanus	Rosaceae	Rosales	Eudicot
Rubus moorei	Rosaceae	Rosales	Eudicot
Rubus nepalensis	Rosaceae	Rosales	Eudicot
Rubus nessensis	Rosaceae	Rosales	Eudicot
Rubus nigricans	Rosaceae	Rosales	Eudicot
Rubus nitidioides	Rosaceae	Rosales	Eudicot
Rubus niveus	Rosaceae	Rosales	Eudicot
Rubus nubigenus	Rosaceae	Rosales	Eudicot
Rubus occidentalis	Rosaceae	Rosales	Eudicot
Rubus odoratus	Rosaceae	Rosales	Eudicot
Rubus ostryfolius	Rosaceae	Rosales	Eudicot
Rubus palmatus	Rosaceae	Rosales	Eudicot
Rubus paniculatus	Rosaceae	Rosales	Eudicot
Rubus parcifrondifer	Rosaceae	Rosales	Eudicot
Rubus parviflorus	Rosaceae	Rosales	Eudicot
Rubus parvifolius	Rosaceae	Rosales	Eudicot
Rubus parvus	Rosaceae	Rosales	Eudicot
Rubus pascuus	Rosaceae	Rosales	Eudicot
Rubus pectinellus	Rosaceae	Rosales	Eudicot
Rubus pedatus	Rosaceae	Rosales	Eudicot
Rubus peltatus	Rosaceae	Rosales	Eudicot
Rubus pergratus	Rosaceae	Rosales	Eudicot
Rubus permixtus	Rosaceae	Rosales	Eudicot
Rubus philadelphicus	Rosaceae	Rosales	Eudicot
Rubus phoenicolasius	Rosaceae	Rosales	Eudicot
Rubus platyphyllus	Rosaceae	Rosales	Eudicot
Rubus platysepalus	Rosaceae	Rosales	Eudicot
Rubus procerus	Rosaceae	Rosales	Eudicot
Rubus pseudo-acer	Rosaceae	Rosales	Eudicot
Rubus pubescens	Rosaceae	Rosales	Eudicot
Rubus pungens	Rosaceae	Rosales	Eudicot
Rubus racemosus	Rosaceae	Rosales	Eudicot
Rubus radicans	Rosaceae	Rosales	Eudicot
Rubus reticulatus	Rosaceae	Rosales	Eudicot
Rubus rhamnifolius	Rosaceae	Rosales	Eudicot
Rubus rolfei	Rosaceae	Rosales	Eudicot
Rubus rosa	Rosaceae	Rosales	Eudicot
Rubus roseus	Rosaceae	Rosales	Eudicot
Rubus rosifolius	Rosaceae	Rosales	Eudicot
Rubus rubiginosus	Rosaceae	Rosales	Eudicot
Rubus sachalinensis	Rosaceae	Rosales	Eudicot
Rubus salteri	Rosaceae	Rosales	Eudicot
Rubus sanguineus	Rosaceae	Rosales	Eudicot
Rubus saxatilis	Rosaceae	Rosales	Eudicot
Rubus schmidelioides	Rosaceae	Rosales	Eudicot
Rubus serissimus	Rosaceae	Rosales	Eudicot
Rubus setchuenensis	Rosaceae	Rosales	Eudicot
Rubus sieboldii	Rosaceae	Rosales	Eudicot
Rubus simplex	Rosaceae	Rosales	Eudicot
Rubus spectabilis	Rosaceae	Rosales	Eudicot
Rubus squarrosus	Rosaceae	Rosales	Eudicot
Rubus stans	Rosaceae	Rosales	Eudicot
Rubus stellatus	Rosaceae	Rosales	Eudicot
Rubus strigosus	Rosaceae	Rosales	Eudicot
Rubus sulcatus	Rosaceae	Rosales	Eudicot
Rubus tephrodes	Rosaceae	Rosales	Eudicot
Rubus thibetanus	Rosaceae	Rosales	Eudicot
Rubus thyrsanthus	Rosaceae	Rosales	Eudicot
Rubus tricolor	Rosaceae	Rosales	Eudicot
Rubus trifidus	Rosaceae	Rosales	Eudicot
Rubus trivialis	Rosaceae	Rosales	Eudicot
Rubus tsangorum	Rosaceae	Rosales	Eudicot
Rubus ulmifolius	Rosaceae	Rosales	Eudicot
Rubus ursinus	Rosaceae	Rosales	Eudicot
Rubus vernus	Rosaceae	Rosales	Eudicot
Rubus vestervicensis	Rosaceae	Rosales	Eudicot
Rubus villosus	Rosaceae	Rosales	Eudicot
Rubus wardii	Rosaceae	Rosales	Eudicot
Rubus x neglectus	Rosaceae	Rosales	Eudicot
Rubus xanthocarpus	Rosaceae	Rosales	Eudicot
Sorbopyrus auricularis	Rosaceae	Rosales	Eudicot
Sorbus alnifolia	Rosaceae	Rosales	Eudicot
Sorbus americana	Rosaceae	Rosales	Eudicot
Sorbus aria	Rosaceae	Rosales	Eudicot
Sorbus aucuparia	Rosaceae	Rosales	Eudicot
Sorbus austriaca	Rosaceae	Rosales	Eudicot
Sorbus commixta	Rosaceae	Rosales	Eudicot
Sorbus decora	Rosaceae	Rosales	Eudicot
Sorbus devoniensis	Rosaceae	Rosales	Eudicot
Sorbus domestica	Rosaceae	Rosales	Eudicot
Sorbus gracilis	Rosaceae	Rosales	Eudicot
Sorbus hybrida	Rosaceae	Rosales	Eudicot
Sorbus intermedia	Rosaceae	Rosales	Eudicot
Sorbus japonica	Rosaceae	Rosales	Eudicot
Sorbus lanata	Rosaceae	Rosales	Eudicot
Sorbus latifolia	Rosaceae	Rosales	Eudicot
Sorbus mougeotii	Rosaceae	Rosales	Eudicot
Sorbus pohuashanensis	Rosaceae	Rosales	Eudicot
Sorbus sambucifolia	Rosaceae	Rosales	Eudicot
Sorbus scopulina	Rosaceae	Rosales	Eudicot
Sorbus sitchensis	Rosaceae	Rosales	Eudicot
Sorbus thibetica	Rosaceae	Rosales	Eudicot
Sorbus torminalis	Rosaceae	Rosales	Eudicot
Sorbus vestita	Rosaceae	Rosales	Eudicot
Alibertia edulis	Rubiaceae	Gentianales	Eudicot
Borojoa patinoi	Rubiaceae	Gentianales	Eudicot
Borojoa sorbilis	Rubiaceae	Gentianales	Eudicot
Borojoa verticillata	Rubiaceae	Gentianales	Eudicot
Coprosma acerosa	Rubiaceae	Gentianales	Eudicot
Coprosma areolata	Rubiaceae	Gentianales	Eudicot
Coprosma atropurpurea	Rubiaceae	Gentianales	Eudicot
Coprosma billardieri	Rubiaceae	Gentianales	Eudicot
Coprosma brunnea	Rubiaceae	Gentianales	Eudicot
Coprosma foetidissima	Rubiaceae	Gentianales	Eudicot
Coprosma grandifolia	Rubiaceae	Gentianales	Eudicot
Coprosma hirtella	Rubiaceae	Gentianales	Eudicot
Coprosma lucida	Rubiaceae	Gentianales	Eudicot
Coprosma moorei	Rubiaceae	Gentianales	Eudicot
Coprosma nitida	Rubiaceae	Gentianales	Eudicot
Coprosma petriei	Rubiaceae	Gentianales	Eudicot
Coprosma propinqua	Rubiaceae	Gentianales	Eudicot
Coprosma pumila	Rubiaceae	Gentianales	Eudicot
Coprosma repens	Rubiaceae	Gentianales	Eudicot
Coprosma rhamnoides	Rubiaceae	Gentianales	Eudicot
Coprosma robusta	Rubiaceae	Gentianales	Eudicot
Coprosma rotundifolia	Rubiaceae	Gentianales	Eudicot
Coprosma rugosa	Rubiaceae	Gentianales	Eudicot
Coprosma serrulata	Rubiaceae	Gentianales	Eudicot
Coprosma virescens	Rubiaceae	Gentianales	Eudicot
Genipa americana	Rubiaceae	Gentianales	Eudicot
Mitchella repens	Rubiaceae	Gentianales	Eudicot
Mitchella undulata	Rubiaceae	Gentianales	Eudicot
Morinda citrifolia	Rubiaceae	Gentianales	Eudicot
Nauclea diderrichii	Rubiaceae	Gentianales	Eudicot
Nauclea latifolia	Rubiaceae	Gentianales	Eudicot
Nauclea orientalis	Rubiaceae	Gentianales	Eudicot
Neolamarckia cadamba	Rubiaceae	Gentianales	Eudicot
Nertera balfouriana	Rubiaceae	Gentianales	Eudicot
Nertera ciliata	Rubiaceae	Gentianales	Eudicot
Nertera cunninghamii	Rubiaceae	Gentianales	Eudicot
Nertera granadensis	Rubiaceae	Gentianales	Eudicot
Passifora ligularis	Rubiaceae	Gentianales	Eudicot
Pentagonia grandiflora	Rubiaceae	Gentianales	Eudicot
Posoqueria latifolia	Rubiaceae	Gentianales	Eudicot
Rosenbergiodendron formosum	Rubiaceae	Gentianales	Eudicot
Rubia akane	Rubiaceae	Gentianales	Eudicot
Rubia cordifolia	Rubiaceae	Gentianales	Eudicot
Rubia manjith	Rubiaceae	Gentianales	Eudicot
Vangueria infausta	Rubiaceae	Gentianales	Eudicot
Vangueria madagascariensis	Rubiaceae	Gentianales	Eudicot
Duroia macrophylla	Rubiaceae	Gentianales	Eudicot
Duroia saccifera	Rubiaceae	Gentianales	Eudicot
Acronychia pedunculata	Rutaceae	Sapindales	Eudicot
Adenandra fragrans	Rutaceae	Sapindales	Eudicot
Adenandra formosana	Rutaceae	Sapindales	Eudicot
Aegle marmelos	Rutaceae	Sapindales	Eudicot
Afraegle paniculata	Rutaceae	Sapindales	Eudicot
Casimiroa edulis	Rutaceae	Sapindales	Eudicot
Citrofortunella floridana	Rutaceae	Sapindales	Eudicot
Citrofortunella microcarpa	Rutaceae	Sapindales	Eudicot
Citrofortunella swinglei	Rutaceae	Sapindales	Eudicot
Citroncirus webberi	Rutaceae	Sapindales	Eudicot
Citropsis articulata	Rutaceae	Sapindales	Eudicot
Citrus aurantiifolia	Rutaceae	Sapindales	Eudicot
Citrus aurantium	Rutaceae	Sapindales	Eudicot
Citrus australasica	Rutaceae	Sapindales	Eudicot
Citrus australis	Rutaceae	Sapindales	Eudicot
Citrus clementina	Rutaceae	Sapindales	Eudicot
Citrus deliciosa	Rutaceae	Sapindales	Eudicot
Citrus grandis	Rutaceae	Sapindales	Eudicot
Citrus hystrix	Rutaceae	Sapindales	Eudicot
Citrus ichangensis	Rutaceae	Sapindales	Eudicot
Citrus jambhiri	Rutaceae	Sapindales	Eudicot
Citrus japonica	Rutaceae	Sapindales	Eudicot
Citrus limetta	Rutaceae	Sapindales	Eudicot
Citrus limettioides	Rutaceae	Sapindales	Eudicot
Citrus limon	Rutaceae	Sapindales	Eudicot
Citrus lucida	Rutaceae	Sapindales	Eudicot
Citrus maxima	Rutaceae	Sapindales	Eudicot
Citrus medica	Rutaceae	Sapindales	Eudicot
Citrus mitis	Rutaceae	Sapindales	Eudicot
Citrus nobilis	Rutaceae	Sapindales	Eudicot
Citrus paradisi	Rutaceae	Sapindales	Eudicot
Citrus reticulata	Rutaceae	Sapindales	Eudicot
Citrus sinenses	Rutaceae	Sapindales	Eudicot
Citrus sinensis	Rutaceae	Sapindales	Eudicot
Citrus trifoliata	Rutaceae	Sapindales	Eudicot
Citrus unshiu	Rutaceae	Sapindales	Eudicot
Citrus warburgiana	Rutaceae	Sapindales	Eudicot
Citrus x bergamia	Rutaceae	Sapindales	Eudicot
Citrus x latifolia	Rutaceae	Sapindales	Eudicot
Citrus x limonia	Rutaceae	Sapindales	Eudicot
Citrus x paradisi	Rutaceae	Sapindales	Eudicot
Citrus x tangelo	Rutaceae	Sapindales	Eudicot
Clausena anisata	Rutaceae	Sapindales	Eudicot
Clausena anisum-olens	Rutaceae	Sapindales	Eudicot
Clausena dentata	Rutaceae	Sapindales	Eudicot
Clausena excavata	Rutaceae	Sapindales	Eudicot
Clausena indica	Rutaceae	Sapindales	Eudicot
Clausena lansium	Rutaceae	Sapindales	Eudicot
Feronia limonia	Rutaceae	Sapindales	Eudicot
Fortunella japonica	Rutaceae	Sapindales	Eudicot
Fortunella margarita	Rutaceae	Sapindales	Eudicot
Fortunella obovata	Rutaceae	Sapindales	Eudicot
Glycosmis pentaphylla	Rutaceae	Sapindales	Eudicot
Limonia acidissima	Rutaceae	Sapindales	Eudicot
Orixa japonica	Rutaceae	Sapindales	Eudicot
Phellodendron amurense	Rutaceae	Sapindales	Eudicot
Phellodendron lavallei	Rutaceae	Sapindales	Eudicot
Swinglea glutinosa	Rutaceae	Sapindales	Eudicot
Teclea afzelii	Rutaceae	Sapindales	Eudicot
Teclea englerima	Rutaceae	Sapindales	Eudicot
Triphasia trifolia	Rutaceae	Sapindales	Eudicot
Zanthoxylum schinifolium	Rutaceae	Sapindales	Eudicot
Zanthoxylum senegalense	Rutaceae	Sapindales	Eudicot
Casearia decandra	Salicaceae	Malpighiales	Eudicot
Dovyalis abyssinica	Salicaceae	Malpighiales	Eudicot
Dovyalis caffra	Salicaceae	Malpighiales	Eudicot
Dovyalis hebecarpa	Salicaceae	Malpighiales	Eudicot
Flacourtia indica	Salicaceae	Malpighiales	Eudicot
Flacourtia inermis	Salicaceae	Malpighiales	Eudicot
Flacourtia jangomas	Salicaceae	Malpighiales	Eudicot
Flacourtia ramontchi	Salicaceae	Malpighiales	Eudicot
Flacourtia rukam	Salicaceae	Malpighiales	Eudicot
Idesia polycarpa	Salicaceae	Malpighiales	Eudicot
Comandra pallida	Santalaceae	Santanales	Eudicot
Comandra richardsiana	Santalaceae	Santanales	Eudicot
Comandra umbellata	Santalaceae	Santanales	Eudicot
Geocaulon lividum	Santalaceae	Santanales	Eudicot
Pyrularia edulis	Santalaceae	Santalales	Eudicot
Santalum acuminatum	Santalaceae	Santalales	Eudicot
Santalum lanceolatum	Santalaceae	Santalales	Eudicot
Santalum spicatum	Santalaceae	Santalales	Eudicot
Viscum album	Santalaceae	Santalales	Eudicot
Allophylus cobbe	Sapindaceae	Sapindales	Eudicot
Blighia sapida	Sapindaceae	Sapindales	Eudicot
Dimocarpus longan	Sapindaceae	Sapindales	Eudicot
Erioglossum rubiginosum	Sapindaceae	Sapindales	Eudicot
Litchi chinensis	Sapindaceae	Sapindales	Eudicot
Litchi sinensis	Sapindaceae	Sapindales	Eudicot
Melicoccus bijugatus	Sapindaceae	Sapindales	Eudicot
Nephelium lappaceum	Sapindaceae	Sapindales	Eudicot
Nephelium mutabile	Sapindaceae	Sapindales	Eudicot
Nephelium ramboutan-ake	Sapindaceae	Sapindales	Eudicot
Sapindus drummondii	Sapindaceae	Sapindales	Eudicot
Sapindus marginatus	Sapindaceae	Sapindales	Eudicot
Sapindus mukorossi	Sapindaceae	Sapindales	Eudicot
Schleichera oleosa	Sapindaceae	Sapindales	Eudicot
Talisia esculenta	Sapindaceae	Sapindales	Eudicot
Paullinia cupana	Sapindaceae	Sapindales	Eudicot
Baillonella toxisperma	Sapotaceae	Ericales	Eudicot
Bumelia lanuginosa	Sapotaceae	Ericales	Eudicot
Bumelia lycioides	Sapotaceae	Ericales	Eudicot
Bumelia tenax	Sapotaceae	Ericales	Eudicot
Chrysophyllum africanum	Sapotaceae	Ericales	Eudicot
Chrysophyllum cainito	Sapotaceae	Ericales	Eudicot
Madhuca latifolia	Sapotaceae	Ericales	Eudicot
Madhuca longifolia	Sapotaceae	Ericales	Eudicot
Manilkara bidentata	Sapotaceae	Ericales	Eudicot
Manilkara chicle	Sapotaceae	Ericales	Eudicot
Manilkara discolor	Sapotaceae	Ericales	Eudicot
Manilkara huberi	Sapotaceae	Ericales	Eudicot
Manilkara kauki	Sapotaceae	Ericales	Eudicot
Manilkara sapota	Sapotaceae	Ericales	Eudicot
Manilkara zapota	Sapotaceae	Ericales	Eudicot
Mimusops elengi	Sapotaceae	Ericales	Eudicot
Payena leeri	Sapotaceae	Ericales	Eudicot
Planchonella australis	Sapotaceae	Ericales	Eudicot
Pouteria caimito	Sapotaceae	Ericales	Eudicot
Pouteria campechiana	Sapotaceae	Ericales	Eudicot
Pouteria campechina	Sapotaceae	Ericales	Eudicot
Pouteria guianensis	Sapotaceae	Ericales	Eudicot
Pouteria hypoglauca	Sapotaceae	Ericales	Eudicot
Pouteria lucuma	Sapotaceae	Ericales	Eudicot
Pouteria macrophylla	Sapotaceae	Ericales	Eudicot
Pouteria pierrei	Sapotaceae	Ericales	Eudicot
Pouteria procera	Sapotaceae	Ericales	Eudicot
Pouteria sapota	Sapotaceae	Ericales	Eudicot
Pouteria viridis	Sapotaceae	Ericales	Eudicot
Synsepalum dulciferum	Sapotaceae	Ericales	Eudicot
Synsepalum dulcificum	Sapotaceae	Ericales	Eudicot
Vitellaria paradoxa	Sapotaceae	Ericales	Eudicot
Ecclinusa guianensis	Sapotaceae	Ericales	Eudicot
Labatia macrocarpa	Sapotaceae	Ericales	Eudicot
Micropholis acutangula	Sapotaceae	Ericales	Eudicot
Neoxythece elegans	Sapotaceae	Ericales	Eudicot
Pouteria macrocarpa	Sapotaceae	Ericales	Eudicot
Pouteria pariry	Sapotaceae	Ericales	Eudicot
Pouteria ramiflora	Sapotaceae	Ericales	Eudicot
Pouteria speciosa	Sapotaceae	Ericales	Eudicot
Pouteria torta	Sapotaceae	Ericales	Eudicot
Pouteria ucuqui	Sapotaceae	Ericales	Eudicot
Kadsura coccinea	Schisandraceae	Austrobaileyales	Eudicot
Kadsura heteroclita	Schisandraceae	Austrobaileyales	Eudicot
Kadsura japonica	Schisandraceae	Austrobaileyales	Eudicot
Kadsura longepedunculata	Schisandraceae	Austrobaileyales	Eudicot
Kadsura oblongifolia	Schisandraceae	Austrobaileyales	Eudicot
Schisandra chinensis	Schisandraceae	Austrobaileyales	Eudicot
Schisandra grandiflora	Schisandraceae	Austrobaileyales	Eudicot
Schisandra henryi	Schisandraceae	Austrobaileyales	Eudicot
Schisandra repanda	Schisandraceae	Austrobaileyales	Eudicot
Schisandra rubriflora	Schisandraceae	Austrobaileyales	Eudicot
Myoporum debile	Scrophulariaceae	Lamiales	Eudicot
Myoporum deserti	Scrophulariaceae	Lamiales	Eudicot
Myoporum insulare	Scrophulariaceae	Lamiales	Eudicot
Myoporum laetum	Scrophulariaceae	Lamiales	Eudicot
Myoporum montanum	Scrophulariaceae	Lamiales	Eudicot
Myoporum platycarpum	Scrophulariaceae	Lamiales	Eudicot
Myoporum tetrandrum	Scrophulariaceae	Lamiales	Eudicot
Picrasma quassioides	Simaroubaceae	Sapindales	Eudicot
Simarouba amara	Simaroubaceae	Sapindales	Eudicot
Simarouba glauca	Simaroubaceae	Sapindales	Eudicot
Capsicum annuum	Solanaceae	Solanales	Eudicot
Capsicum baccatum	Solanaceae	Solanales	Eudicot
Capsicum chinense	Solanaceae	Solanales	Eudicot
Capsicum frutescens	Solanaceae	Solanales	Eudicot
Capsicum pubescens	Solanaceae	Solanales	Eudicot
Cyphomandra betacea	Solanaceae	Solanales	Eudicot
Cyphomandra casana	Solanaceae	Solanales	Eudicot
Cyphomandra crassifolia	Solanaceae	Solanales	Eudicot
Cyphomandra fragrans	Solanaceae	Solanales	Eudicot
Cyphomandra hartwegii	Solanaceae	Solanales	Eudicot
Jaltomata procumbens	Solanaceae	Solanales	Eudicot
Lycianthes moziniana	Solanaceae	Solanales	Eudicot
Lycium afrum	Solanaceae	Solanales	Eudicot
Lycium andersonii	Solanaceae	Solanales	Eudicot
Lycium arabicum	Solanaceae	Solanales	Eudicot
Lycium australe	Solanaceae	Solanales	Eudicot
Lycium barbarum	Solanaceae	Solanales	Eudicot
Lycium berlandieri	Solanaceae	Solanales	Eudicot
Lycium carolinianum	Solanaceae	Solanales	Eudicot
Lycium chinense	Solanaceae	Solanales	Eudicot
Lycium europaeum	Solanaceae	Solanales	Eudicot
Lycium fremontii	Solanaceae	Solanales	Eudicot
Lycium pallidum	Solanaceae	Solanales	Eudicot
Lycium ruthenicum	Solanaceae	Solanales	Eudicot
Lycium schweinfurthii	Solanaceae	Solanales	Eudicot
Lycium torreyi	Solanaceae	Solanales	Eudicot
Physaliastrum echinatum	Solanaceae	Solanales	Eudicot
Physalis acutifolia	Solanaceae	Solanales	Eudicot
Physalis alkekengi	Solanaceae	Solanales	Eudicot
Physalis angulata	Solanaceae	Solanales	Eudicot
[truncated: 237 more rows]
