# Supplementary material for: Viruses Infecting Trees and Herbs That Produce Edible Fleshy Fruits with a Prominent Value in the Global Market: An Evolutionary Perspective
Source: Plants (Basel). 2022 Jan 13;11(2):203. doi: 10.3390/plants11020203 (PMC8778216; doi:10.3390/plants11020203)
Supplement: Supplementary file 1 [file plants-11-00203-s001.zip › Supplementary Table S2.xlsx]

## Sheet: EFFs with economical importance
Supplementary Table S2. EFFs with a prominent value in the global market
EFF	Family	Order	Clade	Growth form
Actinidia chinensis	Actinidiaceae	Ericales	Eudicots	woody
Actinidia deliciosa	Actinidiaceae	Ericales	Eudicots	woody
Mangifera indica	Anacardiaceae	Sapindales	Eudicots	woody
Opuntia ficus-indica	Cactaceae	Caryophyllales	Eudicots	woody
Carica papaya	Caricaceae	Brassicales	Eudicots	woody
Citrullus lanatus	Cucurbitaceae	Cucurbitales	Eudicots	herb
Cucumis melo	Cucurbitaceae	Cucurbitales	Eudicots	herb
Cucumis sativus	Cucurbitaceae	Cucurbitales	Eudicots	herb
Cucurbita maxima	Cucurbitaceae	Cucurbitales	Eudicots	herb
Cucurbita pepo	Cucurbitaceae	Cucurbitales	Eudicots	herb
Lagenaria siceraria	Cucurbitaceae	Cucurbitales	Eudicots	herb
Momordica charantia	Cucurbitaceae	Cucurbitales	Eudicots	herb
Sechium edule	Cucurbitaceae	Cucurbitales	Eudicots	herb
Diospyros kaki	Ebenaceae	Ericales	Eudicots	woody
Vaccinium corymbosum	Ericaceae	Ericales	Eudicots	woody
Ribes nigrum	Grossulariaceae	Saxifragales	Eudicots	woody
Ribes rubrum	Grossulariaceae	Saxifragales	Eudicots	woody
Ribes sativum	Grossulariaceae	Saxifragales	Eudicots	woody
Ribes uva-crispa	Grossulariaceae	Saxifragales	Eudicots	woody
Punica granatum	Lythraceae	Myrtales	Eudicots	woody
Ficus carica	Moraceae	Rosales	Eudicots	woody
Morus alba	Moraceae	Rosales	Eudicots	woody
Psidium guajava	Myrtaceae	Myrtales	Eudicots	woody
Olea europaea	Oleaceae	Lamiales	Eudicots	woody
Passiflora edulis	Passifloraceae	Malpighiales	Eudicots	woody
Cydonia oblonga	Rosaceae	Rosales	Eudicots	woody
Fragaria ananassa	Rosaceae	Rosales	Eudicots	herb
Malus domestica	Rosaceae	Rosales	Eudicots	woody
Prunus armeniaca	Rosaceae	Rosales	Eudicots	woody
Prunus avium	Rosaceae	Rosales	Eudicots	woody
Prunus cerasifera	Rosaceae	Rosales	Eudicots	woody
Prunus cerasus	Rosaceae	Rosales	Eudicots	woody
Prunus domestica	Rosaceae	Rosales	Eudicots	woody
Prunus dulcis	Rosaceae	Rosales	Eudicots	woody
Prunus persica	Rosaceae	Rosales	Eudicots	woody
Prunus salicina	Rosaceae	Rosales	Eudicots	woody
Prunus spinosa	Rosaceae	Rosales	Eudicots	woody
Pyrus communis	Rosaceae	Rosales	Eudicots	woody
Pyrus pyrifolia	Rosaceae	Rosales	Eudicots	woody
Rubus idaeus	Rosaceae	Rosales	Eudicots	woody
Citrus aurantiifolia	Rutaceae	Sapindales	Eudicots	woody
Citrus clementina	Rutaceae	Sapindales	Eudicots	woody
Citrus limon	Rutaceae	Sapindales	Eudicots	woody
Citrus paradisi	Rutaceae	Sapindales	Eudicots	woody
Citrus reticulata	Rutaceae	Sapindales	Eudicots	woody
Citrus sinensis	Rutaceae	Sapindales	Eudicots	woody
Capsicum annuum	Solanaceae	Solanales	Eudicots	herb
Capsicum frutescens	Solanaceae	Solanales	Eudicots	herb
Capsicum baccatum	Solanaceae	Solanales	Eudicots	herb
Capsicum chinense	Solanaceae	Solanales	Eudicots	herb
Capsicum pubescens	Solanaceae	Solanales	Eudicots	herb
Physalis peruviana	Solanaceae	Solanales	Eudicots	herb
Physalis philadelphica	Solanaceae	Solanales	Eudicots	herb
Solanum lycopersicum	Solanaceae	Solanales	Eudicots	herb
Solanum melongena	Solanaceae	Solanales	Eudicots	herb
Solanum muricatum	Solanaceae	Solanales	Eudicots	herb
Solanum sessiliflorum	Solanaceae	Solanales	Eudicots	woody
Vitis vinifera	Vitaceae	Vitales	Eudicots	woody
Phoenix dactylifera	Arecaceae	Arecales	Monocots	woody
Ananas comosus	Bromeliaceae	Poales	Monocots	herb
Musa acuminata	Musaceae	Zingiberales	Monocots	herb
Musa paradisiaca	Musaceae	Zingiberales	Monocots	herb
Annona muricata	Annonaceae	Magnoliales	Magnoliids	woody
Persea americana	Lauraceae	Laurales	Magnoliids	woody
