# Supplementary material for: Viruses Infecting Trees and Herbs That Produce Edible Fleshy Fruits with a Prominent Value in the Global Market: An Evolutionary Perspective
Source: Plants (Basel). 2022 Jan 13;11(2):203. doi: 10.3390/plants11020203 (PMC8778216; doi:10.3390/plants11020203)
Supplement: Supplementary file 1 [file plants-11-00203-s001.zip › Supplementary Table S3.xlsx]

## Sheet: Viruses infecting EFFs
Supplementary Table S3. Virus species infecting EFFs with a prominent value in the global market
Virus	Acronym	Genus	Family	Genome*
Actinidia virus X	AVX	Potexvirus	Alphaflexiviridae	+ssRNA
Cactus virus X	CVX	Potexvirus	Alphaflexiviridae	+ssRNA
Opuntia virus X	OpVX	Potexvirus	Alphaflexiviridae	+ssRNA
Schlumbergera virus X	SchVX	Potexvirus	Alphaflexiviridae	+ssRNA
Zygocactus virus X	ZyVX	Potexvirus	Alphaflexiviridae	+ssRNA
Papaya mosaic virus	PapMV	Potexvirus	Alphaflexiviridae	+ssRNA
Lagenaria mild mosaic virus	LaMMoV	Potexvirus	Alphaflexiviridae	+ssRNA
Olive vein yellowing-associated virus	OVYaV	Potexvirus	Alphaflexiviridae	+ssRNA
Strawberry mild yellow edge virus	SMYEV	Potexvirus	Alphaflexiviridae	+ssRNA
Blackberry virus E	BVE	Allexivirus	Alphaflexiviridae	+ssRNA
Citrus yellow vein clearing virus	CYVCV	Mandarivirus	Alphaflexiviridae	+ssRNA
Indian citrus ringspot virus	ICRSV	Mandarivirus	Alphaflexiviridae	+ssRNA
White clover mosaic virus	WClMV	Potexvirus	Alphaflexiviridae	+ssRNA
Potato virus X	PVX	Potexvirus	Alphaflexiviridae	+ssRNA
Pepino mosaic virus	PepMV	Potexvirus	Alphaflexiviridae	+ssRNA
Blueberry latent virus	BBLV	Amalgavirus	Amalgaviridae	dsRNA
Southern tomato virus	STV	Amalgavirus	Amalgaviridae	dsRNA
Blueberry mosaic associated virus	BlMaV	Ophiovirus	Aspiviridae	-ssRNA
Citrus psorosis virus	CPV	Ophiovirus	Aspiviridae	-ssRNA
Avocado sunblotch viroid	ASBVd	Avsunviroid	Avsunviroidae	ssRNA
Peach latent mosaic viroid	PLMVd	Pelamoviroid	Avsunviroidae	ssRNA
Eggplant latent viroid	ELVd	Elaviroid	Avsunviroidae	ssRNA
Mangifera indica latent virus	MILV	Benyvirus	Benyviridae	+ssRNA
Actinidia seed borne latent virus	ASBLV	Prunevirus	Betaflexiviridae	+ssRNA
Actinidia virus A	AcVA	Vitivirus	Betaflexiviridae	+ssRNA
Actinidia virus B	AcVB	Vitivirus	Betaflexiviridae	+ssRNA
Apple stem grooving virus	ASGV	Capillovirus	Betaflexiviridae	+ssRNA
Citrus leaf blotch virus	CLBV	Citrivirus	Betaflexiviridae	+ssRNA
Actinidia virus C	AcVC	Vitivirus	Betaflexiviridae	+ssRNA
Cactus virus 2	CV-2	Carlavirus	Betaflexiviridae	+ssRNA
Cowpea mild mottle virus	CPMMV	Carlavirus	Betaflexiviridae	+ssRNA
Watermelon virus A	WVA	Wamavirus	Betaflexiviridae	+ssRNA
Melon yellowing-associated virus	MYaV	Carlavirus	Betaflexiviridae	+ssRNA
Cucumber vein-clearing virus	CuVCV	Carlavirus	Betaflexiviridae	+ssRNA
Pea streak virus	PeSV	Carlavirus	Betaflexiviridae	+ssRNA
Red clover vein mosaic virus	RCVMV	Carlavirus	Betaflexiviridae	+ssRNA
Passiflora latent virus	PLV	Carlavirus	Betaflexiviridae	+ssRNA
Persimmon latent virus	PeLV	Carlavirus	Betaflexiviridae	+ssRNA
Blueberry scorch virus	BlScV	Carlavirus	Betaflexiviridae	+ssRNA
Currant virus A	CuVA	Capillovirus	Betaflexiviridae	+ssRNA
Fig latent virus 1	FLV-1	Trichovirus	Betaflexiviridae	+ssRNA
Banana mild mosaic virus	BanMMV	Unassigned	Betaflexiviridae	+ssRNA
Banana virus X	BanVX	Unassigned	Betaflexiviridae	+ssRNA
Apple chlorotic leaf spot virus	ACLSV	Trichovirus	Betaflexiviridae	+ssRNA
Apple stem pitting virus	ASPV	Foveavirus	Betaflexiviridae	+ssRNA
Strawberry pseudo mild yellow edge virus	SPMYEV	Carlavirus	Betaflexiviridae	+ssRNA
Apricot latent virus	ApLV	Foveavirus	Betaflexiviridae	+ssRNA
Apricot pseudo-chlorotic leaf spot virus	APsCLSV	Trichovirus	Betaflexiviridae	+ssRNA
Apricot vein clearing associated virus	AVCaV	Prunevirus	Betaflexiviridae	+ssRNA
Cherry green ring mottle virus	CGRMV	Robigovirus	Betaflexiviridae	+ssRNA
Cherry virus A	CVA	Capillovirus	Betaflexiviridae	+ssRNA
Cherry mottle leaf virus	CMLV	Trichovirus	Betaflexiviridae	+ssRNA
Cherry necrotic rusty mottle virus	CNRMV	Robigovirus	Betaflexiviridae	+ssRNA
Cherry rusty mottle associated virus	CRMaV	Robigovirus	Betaflexiviridae	+ssRNA
Cherry twisted leaf associated virus	CTLaV	Robigovirus	Betaflexiviridae	+ssRNA
Prunus virus T	PrVT	Tepovirus	Betaflexiviridae	+ssRNA
Peach mosaic virus	PcMV	Trichovirus	Betaflexiviridae	+ssRNA
Caucasus prunus virus	CPrV	Prunevirus	Betaflexiviridae	+ssRNA
Asian prunus virus 1	APV1	Foveavirus	Betaflexiviridae	+ssRNA
Peach chlorotic mottle virus	PCMoV	Foveavirus	Betaflexiviridae	+ssRNA
Asian prunus virus 2	APV2	Foveavirus	Betaflexiviridae	+ssRNA
Asian prunus virus 3	APV3	Foveavirus	Betaflexiviridae	+ssRNA
Blackberry virus A	BVA	Vitivirus	Betaflexiviridae	+ssRNA
Rubus canadensis virus 1	RuCV-1	Foveavirus	Betaflexiviridae	+ssRNA
Citrus tatter leaf virus	CiTLV	Capillovirus	Betaflexiviridae	+ssRNA
Potato virus H	PVH	Carlavirus	Betaflexiviridae	+ssRNA
Potato virus M	PVM	Carlavirus	Betaflexiviridae	+ssRNA
Potato virus S	PVS	Carlavirus	Betaflexiviridae	+ssRNA
Grapevine virus A	GVA	Vitivirus	Betaflexiviridae	+ssRNA
Grapevine virus B	GVB	Vitivirus	Betaflexiviridae	+ssRNA
Grapevine virus D	GVD	Vitivirus	Betaflexiviridae	+ssRNA
Grapevine berry inner necrosis virus	GINV	Trichovirus	Betaflexiviridae	+ssRNA
Grapevine Pinot gris virus	GPGV	Trichovirus	Betaflexiviridae	+ssRNA
Grapevine rupestris stem pitting-associated virus	GRSPaV	Foveavirus	Betaflexiviridae	+ssRNA
Grapevine virus E	GVE	Vitivirus	Betaflexiviridae	+ssRNA
Grapevine virus F	GVF	Vitivirus	Betaflexiviridae	+ssRNA
Grapevine virus G	GVG	Vitivirus	Betaflexiviridae	+ssRNA
Grapevine virus H	GVH	Vitivirus	Betaflexiviridae	+ssRNA
Grapevine virus I	GVI	Vitivirus	Betaflexiviridae	+ssRNA
Grapevine virus J	GVJ	Vitivirus	Betaflexiviridae	+ssRNA
Grapevine virus T	GVT	Foveavirus	Betaflexiviridae	+ssRNA
Grapevine Kizil Sapak virus	GKSV	Fivivirus	Betaflexiviridae	+ssRNA
Grapevine virus K	GVK	Vitivirus	Betaflexiviridae	+ssRNA
Grapevine virus L	GVL	Vitivirus	Betaflexiviridae	+ssRNA
Grapevine virus M	GVM	Vitivirus	Betaflexiviridae	+ssRNA
Ourmia melon virus	OuMV	Ourmiavirus	Botourmiaviridae	+ssRNA
Epirus cherry virus	EpCV	Ourmiavirus	Botourmiaviridae	+ssRNA
Alfalfa mosaic virus	AMV	Alfamovirus	Bromoviridae	+ssRNA
Cucumber mosaic virus	CMV	Cucumovirus	Bromoviridae	+ssRNA
Pelargonium zonate spot virus	PZSV	Anulavirus	Bromoviridae	+ssRNA
Tobacco streak virus	TSV	Ilarvirus	Bromoviridae	+ssRNA
Blueberry shock virus	BlShV	Ilarvirus	Bromoviridae	+ssRNA
Prunus necrotic ringspot virus	PNRSV	Ilarvirus	Bromoviridae	+ssRNA
Olive latent virus 2	OLV-2	Oleavirus	Bromoviridae	+ssRNA
Apple mosaic virus	ApMV	Ilarvirus	Bromoviridae	+ssRNA
Fragaria chiloensis latent virus	FCILV	Ilarvirus	Bromoviridae	+ssRNA
Strawberry necrotic shock virus	SNSV	Ilarvirus	Bromoviridae	+ssRNA
Tulare apple mosaic virus	TAMV	Ilarvirus	Bromoviridae	+ssRNA
Prune dwarf virus	PDV	Ilarvirus	Bromoviridae	+ssRNA
American plum line pattern virus	APLPV	Ilarvirus	Bromoviridae	+ssRNA
Blackberry chlorotic ringspot virus	BCRV	Ilarvirus	Bromoviridae	+ssRNA
Citrus variegation virus	CVV	Ilarvirus	Bromoviridae	+ssRNA
Citrus leaf rugose virus	CiLRV	Ilarvirus	Bromoviridae	+ssRNA
Parietaria mottle virus	PMoV	Ilarvirus	Bromoviridae	+ssRNA
Tomato aspermy virus	TAV	Cucumovirus	Bromoviridae	+ssRNA
Spinach latent virus	SpLV	Ilarvirus	Bromoviridae	+ssRNA
Tomato necrotic spot virus	ToNSV	Ilarvirus	Bromoviridae	+ssRNA
Tomato necrotic streak virus	TomNSV	Ilarvirus	Bromoviridae	+ssRNA
Amazon lily mild mottle virus	ALiMMV	Anulavirus	Bromoviridae	+ssRNA
Grapevine angular mosaic virus	GaMoV	Ilarvirus	Bromoviridae	+ssRNA
Grapevine line pattern virus	GLPV	Ilarvirus	Bromoviridae	+ssRNA
Grapevine virus S	GVS	Ilarvirus	Bromoviridae	+ssRNA
Pineapple bacilliform CO virus	PBCOV	Badnavirus	Caulimoviridae	dsDNA-RT
Pineapple bacilliform ER virus	PBERV	Badnavirus	Caulimoviridae	dsDNA-RT
Endogenous pineapple pararetrovirus 1	EPPV1	Badnavirus	Caulimoviridae	dsDNA-RT
Blueberry red ringspot virus	BRRSV	Soymovirus	Caulimoviridae	dsDNA-RT
Gooseberry vein banding associated virus	GVBAV	Badnavirus	Caulimoviridae	dsDNA-RT
Fig badnavirus 1	FBV-1	Badnavirus	Caulimoviridae	dsDNA-RT
Mulberry badnavirus 1	MBV-1	Badnavirus	Caulimoviridae	dsDNA-RT
Banana streak GF virus	BSGFV	Badnavirus	Caulimoviridae	dsDNA-RT
Banana streak IM virus	BSIMV	Badnavirus	Caulimoviridae	dsDNA-RT
Banana streak MY virus	BSMYV	Badnavirus	Caulimoviridae	dsDNA-RT
Banana streak OL virus	BSOLV	Badnavirus	Caulimoviridae	dsDNA-RT
Banana streak UA virus	BSUAV	Badnavirus	Caulimoviridae	dsDNA-RT
Banana streak UI virus	BSUIV	Badnavirus	Caulimoviridae	dsDNA-RT
Banana streak UL virus	BSULV	Badnavirus	Caulimoviridae	dsDNA-RT
Banana streak UM virus	BSUMV	Badnavirus	Caulimoviridae	dsDNA-RT
Banana streak VN virus	BSVNV	Badnavirus	Caulimoviridae	dsDNA-RT
Banana streak virus	BSV	Badnavirus	Caulimoviridae	dsDNA-RT
Strawberry vein banding virus	SVBV	Caulimovirus	Caulimoviridae	dsDNA-RT
Blackberry virus F	BVF	Badnavirus	Caulimoviridae	dsDNA-RT
Rubus yellow net virus	RYNV	Badnavirus	Caulimoviridae	dsDNA-RT
Citrus yellow mosaic virus	CYMV	Badnavirus	Caulimoviridae	dsDNA-RT
Citrus endogenous pararetrovirus	CitPRV	Unassigned	Caulimoviridae	dsDNA-RT
Dahlia mosaic virus	DMV	Caulimovirus	Caulimoviridae	dsDNA-RT
Grapevine roditis leaf discoloration-associated virus	GRLDaV	Badnavirus	Caulimoviridae	dsDNA-RT
Grapevine vein clearing virus	GVCV	Badnavirus	Caulimoviridae	dsDNA-RT
Grapevine badnavirus	GBV1	Badnavirus	Caulimoviridae	dsDNA-RT
Actinidia virus 1	AV1	Unassigned	Closteroviridae	+ssRNA
Pineapple mealybug wilt-associated virus 1	PMWaV-1	Ampelovirus	Closteroviridae	+ssRNA
Pineapple mealybug wilt-associated virus 2	PMWaV-2	Ampelovirus	Closteroviridae	+ssRNA
Pineapple mealybug wilt-associated virus 3	PMWaV-3	Ampelovirus	Closteroviridae	+ssRNA
Pineapple mealybug wilt-associated virus 4	PMWaV-4	Ampelovirus	Closteroviridae	+ssRNA
Pineapple mealybug wilt-associated virus 5	PMWaV-5	Ampelovirus	Closteroviridae	+ssRNA
Beet pseudoyellows virus	BPYV	Crinivirus	Closteroviridae	+ssRNA
Cucurbit chlorotic yellows virus	CCYV	Crinivirus	Closteroviridae	+ssRNA
Cucurbit yellow stunting disorder virus	CYSDV	Crinivirus	Closteroviridae	+ssRNA
Lettuce infectious yellows virus	LIYV	Crinivirus	Closteroviridae	+ssRNA
Tomato chlorosis virus	ToCV	Crinivirus	Closteroviridae	+ssRNA
Persimmon virus B	PeVB	Unassigned	Closteroviridae	+ssRNA
Blueberry virus A	BVA	Unassigned	Closteroviridae	+ssRNA
Grapevine leafroll-associated virus 1	GLRaV-1	Ampelovirus	Closteroviridae	+ssRNA
Fig leaf mottle-associated virus 1	FLMaV-1	Closterovirus	Closteroviridae	+ssRNA
Fig leaf mottle-associated virus 2	FLMaV-2	Ampelovirus	Closteroviridae	+ssRNA
Fig mild mottle-associated virus	FMMaV	Closterovirus	Closteroviridae	+ssRNA
Olive leaf yellowing-associated virus	OLYaV	Unassigned	Closteroviridae	+ssRNA
Strawberry chlorotic fleck-associated virus	SCFaV	Closterovirus	Closteroviridae	+ssRNA
Strawberry pallidosis-associated virus	SPaV	Crinivirus	Closteroviridae	+ssRNA
Little cherry virus 1	LChV-1	Velarivirus	Closteroviridae	+ssRNA
Plum bark necrosis stem pitting-associated virus	PBNSPaV	Ampelovirus	Closteroviridae	+ssRNA
Little cherry virus 2	LChV-2	Ampelovirus	Closteroviridae	+ssRNA
Blackberry vein banding-associated virus	BVBaV	Ampelovirus	Closteroviridae	+ssRNA
Blackberry yellow vein-associated virus	BYVaV	Crinivirus	Closteroviridae	+ssRNA
Raspberry leaf mottle virus	RLMV	Closterovirus	Closteroviridae	+ssRNA
Citrus tristeza virus	CTV	Closterovirus	Closteroviridae	+ssRNA
Lettuce chlorosis virus	LCV	Crinivirus	Closteroviridae	+ssRNA
Potato yellow vein virus	PYVV	Crinivirus	Closteroviridae	+ssRNA
Tomato infectious chlorosis virus	TICV	Crinivirus	Closteroviridae	+ssRNA
Grapevine leafroll-associated virus 2	GLRaV-2	Closterovirus	Closteroviridae	+ssRNA
Grapevine leafroll-associated virus 3	GLRaV-3	Ampelovirus	Closteroviridae	+ssRNA
Grapevine leafroll-associated virus 4	GLRaV-4	Ampelovirus	Closteroviridae	+ssRNA
Grapevine leafroll-associated virus 7	GLRaV-7	Velarivirus	Closteroviridae	+ssRNA
Grapevine leafroll-associated virus 13	GLRaV-13	Ampelovirus	Closteroviridae	+ssRNA
Grapevine leafroll-associated virus 9	GLRaV-9	Ampelovirus	Closteroviridae	+ssRNA
Cucumis melo alphaendornavirus	CmEV	Alphaendornavirus	Endornaviridae	dsRNA
Persea americana alphaendornavirus 1	PaEV 1	Alphaendornavirus	Endornaviridae	dsRNA
Bell pepper alphaendornavirus	BPEV	Alphaendornavirus	Endornaviridae	dsRNA
Hot pepper alphaendornavirus	HpEV	Alphaendornavirus	Endornaviridae	dsRNA
Grapevine endophyte alphaendornavirus	GEEV	Alphaendornavirus	Endornaviridae	dsRNA
Actinidia chlorotic ringspot-associated virus	AcCRaV	Emaravirus	Fimoviridae	-ssRNA
Fig mosaic emaravirus	FMV	Emaravirus	Fimoviridae	-ssRNA
Blackberry leaf mottle-associated virus	BLMaV	Unassigned	Fimoviridae	-ssRNA
Raspberry leaf blotch emaravirus	RLBV	Emaravirus	Fimoviridae	-ssRNA
Ageratum yellow vein virus	AYVV	Begomovirus	Geminiviridae	ssDNA
Chickpea chlorotic dwarf virus	CpCDV	Mastrevirus	Geminiviridae	ssDNA
Chilli leaf curl virus	ChiLCV	Begomovirus	Geminiviridae	ssDNA
Cotton leaf curl Gezira virus	CLCuGeV	Begomovirus	Geminiviridae	ssDNA
Cotton leaf curl Multan virus	CLCuMuV	Begomovirus	Geminiviridae	ssDNA
Croton yellow vein mosaic virus	CroYVMV	Begomovirus	Geminiviridae	ssDNA
Euphorbia leaf curl virus	EuLCuV	Begomovirus	Geminiviridae	ssDNA
Malvastrum leaf curl virus	MaLCuV	Begomovirus	Geminiviridae	ssDNA
Okra enation leaf curl virus	OELCuV	Begomovirus	Geminiviridae	ssDNA
Papaya leaf crumple virus	PaLCrV	Begomovirus	Geminiviridae	ssDNA
Papaya leaf curl China virus	PaLCuCNV	Begomovirus	Geminiviridae	ssDNA
Papaya leaf curl Guandong virus	PaLCuGdV	Begomovirus	Geminiviridae	ssDNA
Papaya leaf curl virus	PaLCuV	Begomovirus	Geminiviridae	ssDNA
Tomato leaf curl New Delhi virus	ToLCNDV	Begomovirus	Geminiviridae	ssDNA
Cucurbit leaf crumple virus	CuLCrV	Begomovirus	Geminiviridae	ssDNA
Melon chlorotic leaf curl virus	MCLCuV	Begomovirus	Geminiviridae	ssDNA
Melon chlorotic mosaic virus	MClMV	Begomovirus	Geminiviridae	ssDNA
Squash leaf curl virus	SLCuV	Begomovirus	Geminiviridae	ssDNA
Tobacco curly shoot virus	TbCSV	Begomovirus	Geminiviridae	ssDNA
Tomato leaf curl Palampur virus	ToLCPalV	Begomovirus	Geminiviridae	ssDNA
Tomato yellow leaf curl virus	TYLCV	Begomovirus	Geminiviridae	ssDNA
Watermelon chlorotic stunt virus	WmCSV	Begomovirus	Geminiviridae	ssDNA
Mungbean yellow mosaic India virus	MYMIV	Begomovirus	Geminiviridae	ssDNA
Pumpkin yellow mosaic virus	PuYMV	Begomovirus	Geminiviridae	ssDNA
Squash leaf curl China virus	SLCCNV	Begomovirus	Geminiviridae	ssDNA
Pepper golden mosaic virus	PepGMV	Begomovirus	Geminiviridae	ssDNA
Squash leaf curl Philippines virus	SLCuPV	Begomovirus	Geminiviridae	ssDNA
Squash leaf curl Yunnan virus	SLCuYV	Begomovirus	Geminiviridae	ssDNA
Squash mild leaf curl virus	SMLCuV	Begomovirus	Geminiviridae	ssDNA
Chayote yellow mosaic virus	ChaYMV	Begomovirus	Geminiviridae	ssDNA
Indian cassava mosaic virus	ICMV	Begomovirus	Geminiviridae	ssDNA
Mulberry mosaic dwarf associated virus	MMDaV	Unassigned	Geminiviridae	ssDNA
Passionfruit leaf distortion virus	PLDV	Begomovirus	Geminiviridae	ssDNA
Passionfruit severe leaf distortion virus	PSLDV	Begomovirus	Geminiviridae	ssDNA
Prunus latent virus	PrLV	Grablovirus	Geminiviridae	ssDNA
Citrus chlorotic dwarf associated virus	CCDaV	Unassigned	Geminiviridae	ssDNA
Beet curly top virus	BCTV	Curtovirus	Geminiviridae	ssDNA
Bhendi yellow vein mosaic virus	BYVMV	Begomovirus	Geminiviridae	ssDNA
Chilli leaf curl Ahmedabad virus	ChiLCAV	Begomovirus	Geminiviridae	ssDNA
Chilli leaf curl Bhavanisagar virus	ChiLCBV	Begomovirus	Geminiviridae	ssDNA
Chilli leaf curl Gonda virus	ChiLCGV	Begomovirus	Geminiviridae	ssDNA
Chilli leaf curl India virus	ChiLCINV	Begomovirus	Geminiviridae	ssDNA
Chilli leaf curl Kanpur virus	ChiLCKaV	Begomovirus	Geminiviridae	ssDNA
Chilli leaf curl Palampur virus	ChiLCPaV	Begomovirus	Geminiviridae	ssDNA
Chilli leaf curl Sri Lanka virus	ChiLCSLV	Begomovirus	Geminiviridae	ssDNA
Chilli leaf curl Vellanad virus	ChiLCVV	Begomovirus	Geminiviridae	ssDNA
Cotton leaf curl Kokhran virus	CLCuKoV	Begomovirus	Geminiviridae	ssDNA
Merremia mosaic virus	MerMV	Begomovirus	Geminiviridae	ssDNA
Pedilanthus leaf curl virus	PeLCV	Begomovirus	Geminiviridae	ssDNA
Pepper huasteco yellow vein virus	PHYVV	Begomovirus	Geminiviridae	ssDNA
Pepper leaf curl Bangladesh virus	PepLCBV	Begomovirus	Geminiviridae	ssDNA
Pepper leaf curl Lahore virus	PepLCLaV	Begomovirus	Geminiviridae	ssDNA
Pepper leaf curl virus	PepLCV	Begomovirus	Geminiviridae	ssDNA
Pepper leaf curl Yunnan virus	PepLCYnV	Begomovirus	Geminiviridae	ssDNA
Pepper leafroll virus	PepLRV	Begomovirus	Geminiviridae	ssDNA
Pepper yellow leaf curl Indonesia virus	PepYLCIV	Begomovirus	Geminiviridae	ssDNA
Pepper yellow leaf curl Indonesia virus 2	PepYLCIV2	Begomovirus	Geminiviridae	ssDNA
Pepper yellow leaf curl Thailand virus	PepYLCTHV	Begomovirus	Geminiviridae	ssDNA
Pepper yellow leaf curl virus	PepYLCV	Begomovirus	Geminiviridae	ssDNA
Pepper yellow vein Mali virus	PepYVMLV	Begomovirus	Geminiviridae	ssDNA
Sri Lankan cassava mosaic virus	SLCMV	Begomovirus	Geminiviridae	ssDNA
Tobacco yellow crinkle virus	TbYCV	Begomovirus	Geminiviridae	ssDNA
Tomato chino La Paz virus	ToChLPV	Begomovirus	Geminiviridae	ssDNA
Tomato dwarf leaf virus	ToDfLV	Begomovirus	Geminiviridae	ssDNA
Tomato leaf curl Cebu virus	ToLCCeV	Begomovirus	Geminiviridae	ssDNA
Tomato leaf curl Joydebpur virus	ToLCJoV	Begomovirus	Geminiviridae	ssDNA
Tomato leaf curl Philippines virus	ToLCPV	Begomovirus	Geminiviridae	ssDNA
Tomato leaf curl Sinaloa virus	ToLCSiV	Begomovirus	Geminiviridae	ssDNA
Tomato leaf curl Sulawesi virus	ToLCSuV	Begomovirus	Geminiviridae	ssDNA
Tomato severe rugose virus	ToSRV	Begomovirus	Geminiviridae	ssDNA
Tomato yellow leaf curl Mali virus	TYLCMLV	Begomovirus	Geminiviridae	ssDNA
Tomato yellow leaf curl Thailand virus	TYLCTHV	Begomovirus	Geminiviridae	ssDNA
Tomato yellow vein streak virus	ToYVSV	Begomovirus	Geminiviridae	ssDNA
Tomato chlorotic leaf distortion virus	ToClLDV	Begomovirus	Geminiviridae	ssDNA
Ageratum enation virus	AEV	Begomovirus	Geminiviridae	ssDNA
Ageratum yellow vein Hualian virus	AYVHuV	Begomovirus	Geminiviridae	ssDNA
Beet curly top Iran virus	BCTIV	Becurtovirus	Geminiviridae	ssDNA
Chino del tomate Amazonas virus	CdTAV	Begomovirus	Geminiviridae	ssDNA
Chino del tomate virus	CdTV	Begomovirus	Geminiviridae	ssDNA
Honeysuckle yellow vein virus	HYVV	Begomovirus	Geminiviridae	ssDNA
Malvastrum yellow vein virus	MaYVV	Begomovirus	Geminiviridae	ssDNA
Potato yellow mosaic Panama virus	PYMPV	Begomovirus	Geminiviridae	ssDNA
Potato yellow mosaic virus	PYMV	Begomovirus	Geminiviridae	ssDNA
Tomato bright yellow mosaic virus	ToBYMV	Begomovirus	Geminiviridae	ssDNA
Tomato bright yellow mottle virus	ToBYMoV	Begomovirus	Geminiviridae	ssDNA
Tomato chlorotic mottle Guyane virus	ToCMoGV	Begomovirus	Geminiviridae	ssDNA
Tomato chlorotic mottle virus	ToCMoV	Begomovirus	Geminiviridae	ssDNA
Tomato common mosaic virus	ToCmMV	Begomovirus	Geminiviridae	ssDNA
Tomato curly stunt virus	ToCSV	Begomovirus	Geminiviridae	ssDNA
Tomato enation leaf curl virus	ToELCV	Begomovirus	Geminiviridae	ssDNA
Tomato golden leaf distortion virus	ToGLDV	Begomovirus	Geminiviridae	ssDNA
Tomato golden leaf spot virus	ToGLSV	Begomovirus	Geminiviridae	ssDNA
Tomato golden mosaic virus	TGMV	Begomovirus	Geminiviridae	ssDNA
Tomato golden mottle virus	ToGMoV	Begomovirus	Geminiviridae	ssDNA
Tomato golden vein virus	TGVV	Begomovirus	Geminiviridae	ssDNA
Tomato interveinal chlorosis virus	ToICV	Begomovirus	Geminiviridae	ssDNA
Tomato latent virus	ToLV	Begomovirus	Geminiviridae	ssDNA
Tomato leaf curl Anjouan virus	ToLCAnV	Begomovirus	Geminiviridae	ssDNA
Tomato leaf curl Arusha virus	ToLCArV	Begomovirus	Geminiviridae	ssDNA
Tomato leaf curl Bangalore virus	ToLCBaV	Begomovirus	Geminiviridae	ssDNA
Tomato leaf curl Bangladesh virus	ToLCBV	Begomovirus	Geminiviridae	ssDNA
Tomato leaf curl Burkina Faso virus	TLCBFV	Begomovirus	Geminiviridae	ssDNA
Tomato leaf curl China virus	ToLCCNV	Begomovirus	Geminiviridae	ssDNA
Tomato leaf curl Comoros virus	ToLCKMV	Begomovirus	Geminiviridae	ssDNA
Tomato leaf curl Diana virus	ToLCDiV	Begomovirus	Geminiviridae	ssDNA
Tomato leaf curl Ghana virus	ToLCGV	Begomovirus	Geminiviridae	ssDNA
Tomato leaf curl Guangdong virus	ToLCGdV	Begomovirus	Geminiviridae	ssDNA
Tomato leaf curl Guangxi virus	ToLCGxV	Begomovirus	Geminiviridae	ssDNA
Tomato leaf curl Gujarat virus	ToLCGuV	Begomovirus	Geminiviridae	ssDNA
Tomato leaf curl Hainan virus	ToLCHaiV	Begomovirus	Geminiviridae	ssDNA
Tomato leaf curl Hanoi virus	ToLCHaV	Begomovirus	Geminiviridae	ssDNA
Tomato leaf curl Hsinchu virus	ToLCHsV	Begomovirus	Geminiviridae	ssDNA
Tomato leaf curl Iran virus	ToLCIrV	Begomovirus	Geminiviridae	ssDNA
Tomato leaf curl Japan virus	ToLCJV	Begomovirus	Geminiviridae	ssDNA
Tomato leaf curl Java virus	ToLCJaV	Begomovirus	Geminiviridae	ssDNA
Tomato leaf curl Karnataka virus	ToLCKaV	Begomovirus	Geminiviridae	ssDNA
Tomato leaf curl Karnataka virus 2	ToLCKV2	Begomovirus	Geminiviridae	ssDNA
Tomato leaf curl Karnataka virus 3	ToLCKV3	Begomovirus	Geminiviridae	ssDNA
Tomato leaf curl Kerala virus	ToLCKeV	Begomovirus	Geminiviridae	ssDNA
Tomato leaf curl Laos virus	ToLCLV	Begomovirus	Geminiviridae	ssDNA
Tomato leaf curl Liwa virus	ToLCLwV	Begomovirus	Geminiviridae	ssDNA
Tomato leaf curl Madagascar virus	ToLCMGV	Begomovirus	Geminiviridae	ssDNA
Tomato leaf curl Mali virus	ToLCMLV	Begomovirus	Geminiviridae	ssDNA
Tomato leaf curl Mindanao virus	ToLCMiV	Begomovirus	Geminiviridae	ssDNA
Tomato leaf curl Moheli virus	ToLCMohV	Begomovirus	Geminiviridae	ssDNA
Tomato leaf curl Namakely virus	ToLCNaV	Begomovirus	Geminiviridae	ssDNA
Tomato leaf curl New Delhi virus 2	ToLCNDV2	Begomovirus	Geminiviridae	ssDNA
Tomato leaf curl New Delhi virus 4	ToLCNDV4	Begomovirus	Geminiviridae	ssDNA
Tomato leaf curl New Delhi virus 5	ToLCNDV5	Begomovirus	Geminiviridae	ssDNA
Tomato leaf curl Nigeria virus	ToLCNGV	Begomovirus	Geminiviridae	ssDNA
Tomato leaf curl Patna virus	ToLCPatV	Begomovirus	Geminiviridae	ssDNA
Tomato leaf curl Pune virus	ToLCPuV	Begomovirus	Geminiviridae	ssDNA
Tomato leaf curl purple vein virus	ToLCPVV	Begomovirus	Geminiviridae	ssDNA
Tomato leaf curl Rajasthan virus	ToLCRaV	Begomovirus	Geminiviridae	ssDNA
Tomato leaf curl Seychelles virus	ToLCSCV	Begomovirus	Geminiviridae	ssDNA
Tomato leaf curl Sri Lanka virus	ToLCLKV	Begomovirus	Geminiviridae	ssDNA
Tomato leaf curl Sudan virus	ToLCSDV	Begomovirus	Geminiviridae	ssDNA
Tomato leaf curl Taiwan virus	ToLCTV	Begomovirus	Geminiviridae	ssDNA
Tomato leaf curl Tanzania virus	ToLCTZV	Begomovirus	Geminiviridae	ssDNA
Tomato leaf curl Toliara virus	ToLCToV	Begomovirus	Geminiviridae	ssDNA
Tomato leaf curl Uganda virus	ToLCUV	Begomovirus	Geminiviridae	ssDNA
Tomato leaf curl Vietnam virus	ToLCVV	Begomovirus	Geminiviridae	ssDNA
Tomato leaf curl virus	ToLCV	Begomovirus	Geminiviridae	ssDNA
Tomato leaf deformation virus	ToLDeV	Begomovirus	Geminiviridae	ssDNA
Tomato leaf distortion virus	ToLDV	Begomovirus	Geminiviridae	ssDNA
Tomato mild mosaic virus	ToMMV	Begomovirus	Geminiviridae	ssDNA
Tomato mild yellow leaf curl Aragua virus	ToMYLCAV	Begomovirus	Geminiviridae	ssDNA
Tomato mosaic Havana virus	ToMHaV	Begomovirus	Geminiviridae	ssDNA
Tomato mottle leaf curl virus	ToMoLCV	Begomovirus	Geminiviridae	ssDNA
Tomato mottle Taino virus	ToMoTaV	Begomovirus	Geminiviridae	ssDNA
Tomato mottle virus	ToMoV	Begomovirus	Geminiviridae	ssDNA
Tomato mottle wrinkle virus	ToMoWV	Begomovirus	Geminiviridae	ssDNA
Tomato pseudo-curly top virus	TPCTV	Topocuvirus	Geminiviridae	ssDNA
Tomato rugose mosaic virus	ToRMV	Begomovirus	Geminiviridae	ssDNA
Tomato rugose yellow leaf curl virus	TRYLCV	Begomovirus	Geminiviridae	ssDNA
Tomato severe leaf curl Kalakada virus	ToSLCKV	Begomovirus	Geminiviridae	ssDNA
Tomato severe leaf curl virus	ToSLCV	Begomovirus	Geminiviridae	ssDNA
Tomato wrinkled mosaic virus	ToWMV	Begomovirus	Geminiviridae	ssDNA
Tomato yellow leaf curl Axarquia virus	TYLCAxV	Begomovirus	Geminiviridae	ssDNA
Tomato yellow leaf curl China virus	TYLCCNV	Begomovirus	Geminiviridae	ssDNA
Tomato yellow leaf curl Guangdong virus	TYLCGdV	Begomovirus	Geminiviridae	ssDNA
Tomato yellow leaf curl Indonesia virus	TYLCIDV	Begomovirus	Geminiviridae	ssDNA
Tomato yellow leaf curl Kanchanaburi virus	TYLCKaV	Begomovirus	Geminiviridae	ssDNA
Tomato yellow leaf curl Malaga virus	TYLCMaV	Begomovirus	Geminiviridae	ssDNA
Tomato yellow leaf curl Sardinia virus	TYLCSaV	Begomovirus	Geminiviridae	ssDNA
Tomato yellow leaf curl Shuangbai virus	TYLCShV	Begomovirus	Geminiviridae	ssDNA
Tomato yellow leaf curl Vietnam virus	TYLCVV	Begomovirus	Geminiviridae	ssDNA
Tomato yellow leaf curl Yunnan virus	TYLCYnV	Begomovirus	Geminiviridae	ssDNA
Tomato yellow leaf distortion virus	ToYLDV	Begomovirus	Geminiviridae	ssDNA
Tomato yellow margin leaf curl virus	ToYMLCV	Begomovirus	Geminiviridae	ssDNA
Tomato yellow mottle virus	ToYMoV	Begomovirus	Geminiviridae	ssDNA
Tomato yellow spot virus	ToYSV	Begomovirus	Geminiviridae	ssDNA
Turnip curly top virus	TCTV	Turncurtovirus	Geminiviridae	ssDNA
Grapevine red blotch virus	GRBV	Grablovirus	Geminiviridae	ssDNA
Grapevine begomovirus A	GBVA	Begomovirus	Geminiviridae	ssDNA
Wild Vitis latent virus 1	WVV1	Grablovirus	Geminiviridae	ssDNA
Grapevine geminivirus A	GGVA	Unassigned	Geminiviridae	ssDNA
Temperate fruit-decay-associated virus	TFDaV	Unassigned	Geminiviridae	ssDNA
Blueberry necrotic ring blotch virus	BNRBV	Blunervirus	Kitaviridae	+ssRNA
Passion fruit green spot virus	PFGSV	Cilevirus	Kitaviridae	+ssRNA
Citrus leprosis virus C	CiLV-C	Cilevirus	Kitaviridae	+ssRNA
Citrus leprosis virus C2	CiLV-C2	Cilevirus	Kitaviridae	+ssRNA
Hibiscus green spot virus 2	HGSV2	Higrevirus	Kitaviridae	+ssRNA
Beet western yellows virus	BWYV	Polerovirus	Luteoviridae	+ssRNA
Cucurbit aphid-borne yellows virus	CABYV	Polerovirus	Luteoviridae	+ssRNA
Pepo aphid-borne yellows virus	PABYV	Polerovirus	Luteoviridae	+ssRNA
Melon aphid-borne yellows virus	MABYV	Polerovirus	Luteoviridae	+ssRNA
Cherry associated luteovirus	ChALV	Luteovirus	Luteoviridae	+ssRNA
Nectarine stem pitting associated virus	NSPaV	Luteovirus	Luteoviridae	+ssRNA
Citrus vein enation virus	CVEV	Enamovirus	Luteoviridae	+ssRNA
Pepper vein yellows virus 1	PeVYV-1	Polerovirus	Luteoviridae	+ssRNA
Pepper vein yellows virus 2	PeVYV-2	Polerovirus	Luteoviridae	+ssRNA
Pepper vein yellows virus 3	PeVYV-3	Polerovirus	Luteoviridae	+ssRNA
Pepper vein yellows virus 4	PeVYV-4	Polerovirus	Luteoviridae	+ssRNA
Pepper vein yellows virus 5	PeVYV-5	Polerovirus	Luteoviridae	+ssRNA
Pepper vein yellows virus 6	PeVYV-6	Polerovirus	Luteoviridae	+ssRNA
Potato leafroll virus	PLRV	Polerovirus	Luteoviridae	+ssRNA
Grapevine enamovirus 1	GEV-1	Enamovirus	Luteoviridae	+ssRNA
Banana bunchy top virus	BBTV	Babuvirus	Nanoviridae	ssDNA
Abaca bunchy top virus	ABTV	Babuvirus	Nanoviridae	ssDNA
Temperate fruit decay-associated virus	TFDaV	Unassigned	Unassigned	ND
Wineberry latent virus	WLV	Unassigned	Unassigned	ND
Tomato bunchy top viroid	ToBTVd	Unassigned	Unassigned	ND
Cucumber cryptic virus	CuCV	Alphacryptovirus	Partitiviridae	dsRNA
Persimmon cryptic virus	PeCV	Deltapartitivirus	Partitiviridae	dsRNA
Fig cryptic virus	FCV	Deltapartitivirus	Partitiviridae	dsRNA
Fragaria chiloensis cryptic virus	FCCV	Deltapartitivirus	Partitiviridae	dsRNA
Pepper cryptic virus 1	PCV1	Deltapartitivirus	Partitiviridae	dsRNA
Pepper cryptic virus 2	PCV2	Deltapartitivirus	Partitiviridae	dsRNA
Grapevine cryptic virus	GCV	Deltapartitivirus	Partitiviridae	dsRNA
Papaya mild yellow leaf virus	PMYLV	Tenuivirus	Phenuiviridae	-ssRNA
Grapevine Garan dmak virus	GGDV	Rubodvirus	Phenuiviridae	-ssRNA
Grapevine Muscat rose virus	GMRV	Rubodvirus	Phenuiviridae	-ssRNA
Coconut cadang-cadang viroid	CCCVd	Cocadviroid	Pospiviroidae	ssRNA
Hop stunt viroid	HpSVD	Hostuviroid	Pospiviroidae	ssRNA
Apple fruit crinkle viroid	AFCVd	Apscaviroid	Pospiviroidae	ssRNA
Citrus viroid VI	CVd VI	Apscaviroid	Pospiviroidae	ssRNA
Persimmon latent viroid	PLVd	Apscaviroid	Pospiviroidae	ssRNA
Potato spindle tuber viroid	PSTVd	Pospiviroid	Pospiviroidae	ssRNA
Apple dimple fruit viroid	ADFVd	Apscaviroid	Pospiviroidae	ssRNA
Citrus exocortis viroid	CEVd	Pospiviroid	Pospiviroidae	ssRNA
Pear blister canker viroid	PBCVd	Apscaviroid	Pospiviroidae	ssRNA
Apple scar skin viroid	ASSVd	Apscaviroid	Pospiviroidae	ssRNA
Citrus bark cracking viroid	CBCVd	Cocadviroid	Pospiviroidae	ssRNA
Citrus bent leaf viroid	CBLVd	Apscaviroid	Pospiviroidae	ssRNA
Citrus dwarfing viroid	CDVd	Apscaviroid	Pospiviroidae	ssRNA
Citrus viroid V	CVd V	Apscaviroid	Pospiviroidae	ssRNA
Pepper chat fruit viroid	PCFVd	Pospiviroid	Pospiviroidae	ssRNA
Tomato apical stunt viroid	TASVd	Pospiviroid	Pospiviroidae	ssRNA
Chrysanthemum stunt viroid	CSVd	Pospiviroid	Pospiviroidae	ssRNA
Columnea latent viroid	CLVd	Pospiviroid	Pospiviroidae	ssRNA
Tomato chlorotic dwarf viroid	TCDVd	Pospiviroid	Pospiviroidae	ssRNA
Tomato planta macho viroid	TPMVd	Pospiviroid	Pospiviroidae	ssRNA
Australian grapevine viroid	AGVd	Apscaviroid	Pospiviroidae	ssRNA
Grapevine yellow speckle viroid 1	GYSVd-1	Apscaviroid	Pospiviroidae	ssRNA
Grapevine yellow speckle viroid 2	GYSVd-2	Apscaviroid	Pospiviroidae	ssRNA
Moroccan watermelon mosaic virus	MWMV	Potyvirus	Potyviridae	+ssRNA
Papaya leaf distortion mosaic virus	PLDMV	Potyvirus	Potyviridae	+ssRNA
Papaya ringspot virus	PRSV	Potyvirus	Potyviridae	+ssRNA
Cucumber vein yellowing virus	CVYV	Ipomovirus	Potyviridae	+ssRNA
Squash vein yellowing virus	SqVYV	Ipomovirus	Potyviridae	+ssRNA
Watermelon leaf mottle virus	WLMV	Potyvirus	Potyviridae	+ssRNA
Watermelon mosaic virus	WMV	Potyvirus	Potyviridae	+ssRNA
Zucchini yellow mosaic virus	ZYMV	Potyvirus	Potyviridae	+ssRNA
Melon vein-banding mosaic virus	MVbMV	Potyvirus	Potyviridae	+ssRNA
Sudan watermelon mosaic virus	SuWMV	Potyvirus	Potyviridae	+ssRNA
Wild melon banding virus	WMBV	Potyvirus	Potyviridae	+ssRNA
Zucchini yellow fleck virus	ZYFV	Potyvirus	Potyviridae	+ssRNA
Potato virus Y	PVY	Potyvirus	Potyviridae	+ssRNA
Zucchini tigre mosaic virus	ZTMV	Potyvirus	Potyviridae	+ssRNA
Cucurbit vein banding virus	CVBV	Potyvirus	Potyviridae	+ssRNA
Algerian watermelon mosaic virus	AWMV	Potyvirus	Potyviridae	+ssRNA
Bean yellow mosaic virus	BYMV	Potyvirus	Potyviridae	+ssRNA
Zucchini shoestring virus	ZSSV	Potyvirus	Potyviridae	+ssRNA
Banana bract mosaic virus	BBrMV	Potyvirus	Potyviridae	+ssRNA
Sugarcane mosaic virus	SCMV	Potyvirus	Potyviridae	+ssRNA
Cowpea aphid-borne mosaic virus	CABMV	Potyvirus	Potyviridae	+ssRNA
East Asian passiflora virus	EAPV	Potyvirus	Potyviridae	+ssRNA
Passion fruit woodiness virus	PWV	Potyvirus	Potyviridae	+ssRNA
Soybean mosaic virus	SMV	Potyvirus	Potyviridae	+ssRNA
Telosma mosaic virus	TelMV	Potyvirus	Potyviridae	+ssRNA
Ugandan passiflora virus	UPV	Potyvirus	Potyviridae	+ssRNA
Plum pox virus	PPV	Potyvirus	Potyviridae	+ssRNA
Blackberry virus Y	BlVY	Brambyvirus	Potyviridae	+ssRNA
Chilli ringspot virus	ChiRSV	Potyvirus	Potyviridae	+ssRNA
Chilli veinal mottle virus	ChiVMV	Potyvirus	Potyviridae	+ssRNA
Pepper mottle virus	PepMoV	Potyvirus	Potyviridae	+ssRNA
Pepper severe mosaic virus	PepSMV	Potyvirus	Potyviridae	+ssRNA
Pepper veinal mottle virus	PVMV	Potyvirus	Potyviridae	+ssRNA
Pepper yellow mosaic virus	PepYMV	Potyvirus	Potyviridae	+ssRNA
Tobacco etch virus	TEV	Potyvirus	Potyviridae	+ssRNA
Ecuadorian rocoto virus	EcRV	Potyvirus	Potyviridae	+ssRNA
Colombian datura virus	CDV	Potyvirus	Potyviridae	+ssRNA
Turnip mosaic virus	TuMV	Potyvirus	Potyviridae	+ssRNA
Peru tomato mosaic virus	PTV	Potyvirus	Potyviridae	+ssRNA
Tomato mild mottle virus	TMMoV	Ipomovirus	Potyviridae	+ssRNA
Tomato necrotic stunt virus	TNSV	Potyvirus	Potyviridae	+ssRNA
Wild potato mosaic virus	WPMV	Potyvirus	Potyviridae	+ssRNA
Eggplant blister mottled virus	EBMV	Potyvirus	Potyviridae	+ssRNA
Bean common mosaic virus	BCMV	Potyvirus	Potyviridae	+ssRNA
Raspberry leaf spot virus	RLSV	Unassigned	Reoviridae	dsRNA
Grapevine Cabernet Sauvignon reovirus	GCSV	Unassigned	Reoviridae	dsRNA
Soursop yellow blotch virus	SYBV	Unassigned	Rhabdoviridae	-ssRNA
Pineapple chlorotic leaf streak virus	PCLSV	Unassigned	Rhabdoviridae	-ssRNA
Papaya apical necrosis virus	PANV	Rhabdovirus	Rhabdoviridae	-ssRNA
Papaya droopy necrosis virus	PDNV	Rhabdovirus	Rhabdoviridae	-ssRNA
Eggplant mottled dwarf virus	EMDV	Nucleorhabdovirus	Rhabdoviridae	-ssRNA
Melon variegation virus	MVV	Unassigned	Rhabdoviridae	-ssRNA
Persimmon virus A	PeVA	Cytorhabdovirus	Rhabdoviridae	-ssRNA
Strawberry crinkle virus	SCV	Cytorhabdovirus	Rhabdoviridae	-ssRNA
Strawberry latent C virus	SLCV	Nucleorhabdovirus	Rhabdoviridae	-ssRNA
Raspberry vein chlorosis virus	RVCV	Cytorhabdovirus	Rhabdoviridae	-ssRNA
Citrus chlorotic spot virus	CiCSV	Dichorhavirus	Rhabdoviridae	-ssRNA
Citrus leprosis virus N	CiLV-N	Dichorhavirus	Rhabdoviridae	-ssRNA
Iranian citrus ringspot-associated virus	IrCRSaV	Cytorhabdovirus	Rhabdoviridae	-ssRNA
Physostegia chlorotic mottle virus	PhCMoV	Nucleorhabdovirus	Rhabdoviridae	-ssRNA
Tomato yellow mottle-associated virus	TYMaV	Cytorhabdovirus	Rhabdoviridae	-ssRNA
Cherry leaf roll virus	CLRV	Nepovirus	Secoviridae	+ssRNA
Tobacco ringspot virus	TRSV	Nepovirus	Secoviridae	+ssRNA
Squash mosaic virus	SqMV	Comovirus	Secoviridae	+ssRNA
Tomato ringspot virus	ToRSV	Nepovirus	Secoviridae	+ssRNA
Melon mild mottle virus	MMMoV	Nepovirus	Secoviridae	+ssRNA
Squash chlorotic leaf spot virus	SCLSV	Torradovirus	Secoviridae	+ssRNA
Artichoke yellow ringspot virus	AYRSV	Nepovirus	Secoviridae	+ssRNA
Tomato black ring virus	TBRV	Nepovirus	Secoviridae	+ssRNA
Cucurbit mild mosaic virus	CuMMV	Fabavirus	Secoviridae	+ssRNA
Grapevine fanleaf virus	GFLV	Nepovirus	Secoviridae	+ssRNA
Blueberry latent spherical virus	BLSV	Nepovirus	Secoviridae	+ssRNA
Blueberry leaf mottle virus	BLMoV	Nepovirus	Secoviridae	+ssRNA
Peach rosette mosaic virus	PRMV	Nepovirus	Secoviridae	+ssRNA
Arabis mosaic virus	ArMV	Nepovirus	Secoviridae	+ssRNA
Blackcurrant reversion virus	BRV	Nepovirus	Secoviridae	+ssRNA
Blackcurrant waikavirus A	BCWVA	Waikavirus	Secoviridae	+ssRNA
Currant latent virus	CuLV	Cheravirus	Secoviridae	+ssRNA
Raspberry ringspot virus	RpRSV	Nepovirus	Secoviridae	+ssRNA
Strawberry latent ringspot virus	SLRSV	Unassigned	Secoviridae	+ssRNA
Mulberry mosaic leaf roll associated virus	MMLRaV	Nepovirus	Secoviridae	+ssRNA
Mulberry ringspot virus	MRSV	Nepovirus	Secoviridae	+ssRNA
Olive latent ring spot virus	OLRSV	Nepovirus	Secoviridae	+ssRNA
Strawberry mottle virus	SMoV	Unassigned	Secoviridae	+ssRNA
Apple latent spherical virus	ALSV	Cheravirus	Secoviridae	+ssRNA
Cherry rasp leaf virus	CRLV	Cheravirus	Secoviridae	+ssRNA
Apricot latent ringspot virus	ALRSV	Nepovirus	Secoviridae	+ssRNA
Prunus virus F	PrVF	Fabavirus	Secoviridae	+ssRNA
Myrobalan latent ring spot virus	MLRSV	Nepovirus	Secoviridae	+ssRNA
Stocky prune virus	StPV	Cheravirus	Secoviridae	+ssRNA
Black raspberry necrosis virus	BRNV	Unassigned	Secoviridae	+ssRNA
Satsuma dwarf virus	SDV	Sadwavirus	Secoviridae	+ssRNA
Andean potato mottle virus	APMoV	Comovirus	Secoviridae	+ssRNA
Broad bean wilt virus 1	BBWV-1	Fabavirus	Secoviridae	+ssRNA
Broad bean wilt virus 2	BBWV-2	Fabavirus	Secoviridae	+ssRNA
Tomato marchitez virus	ToMarV	Torradovirus	Secoviridae	+ssRNA
Tomato torrado virus	ToTV	Torradovirus	Secoviridae	+ssRNA
Tomato chocolate spot virus	ToChSV	Torradovirus	Secoviridae	+ssRNA
Tomato chocolate virus	ToChV	Torradovirus	Secoviridae	+ssRNA
Tomato necrotic dwarf virus	ToNDV	Torradovirus	Secoviridae	+ssRNA
Broad bean wilt virus	BBWV	Fabavirus	Secoviridae	+ssRNA
Artichoke Italian latent virus	AILV	Nepovirus	Secoviridae	+ssRNA
Grapevine Anatolian ringspot virus	GARSV	Nepovirus	Secoviridae	+ssRNA
Grapevine Bulgarian latent virus	GBLV	Nepovirus	Secoviridae	+ssRNA
Grapevine chrome mosaic virus	GCMV	Nepovirus	Secoviridae	+ssRNA
Grapevine deformation virus	GDefV	Nepovirus	Secoviridae	+ssRNA
Grapevine Tunisian ringspot virus	GTRSV	Nepovirus	Secoviridae	+ssRNA
Papaya lethal yellowing virus	PLYV	Sobemovirus	Solemoviridae	+ssRNA
Snake melon asteroid mosaic virus	SMAMV	Sobemovirus	Solemoviridae	+ssRNA
Blueberry shoestring virus	BSSV	Sobemovirus	Solemoviridae	+ssRNA
Sowbane mosaic virus	SoMV	Sobemovirus	Solemoviridae	+ssRNA
Cucumber necrosis virus	CNV	Tombusvirus	Tombusviridae	+ssRNA
Papaya meleira virus 2	PMeV2	Umbravirus	Tombusviridae	+ssRNA
Papaya virus Q	PpVQ	Umbravirus	Tombusviridae	+ssRNA
Melon necrotic spot virus	MNSV	Gammacarmovirus	Tombusviridae	+ssRNA
Cucumber Bulgarian latent virus	CBLV	Tombusvirus	Tombusviridae	+ssRNA
Cucumber leaf spot virus	CLSV	Aureusvirus	Tombusviridae	+ssRNA
Cucumber soil-borne virus	CuSBV	Unassigned	Tombusviridae	+ssRNA
Tobacco necrosis virus A	TNV-A	Alphanecrovirus	Tombusviridae	+ssRNA
Tobacco necrosis virus D	TNV-D	Betanecrovirus	Tombusviridae	+ssRNA
Olive latent virus 1	OLV-1	Alphanecrovirus	Tombusviridae	+ssRNA
Olive mild mosaic virus	OMMV	Alphanecrovirus	Tombusviridae	+ssRNA
Tomato bushy stunt virus	TBSV	Tombusvirus	Tombusviridae	+ssRNA
Carnation Italian ringspot virus	CIRV	Tombusvirus	Tombusviridae	+ssRNA
Petunia asteroid mosaic virus	PetAMV	Tombusvirus	Tombusviridae	+ssRNA
Eggplant mottled crinkle virus	EMCV	Tombusvirus	Tombusviridae	+ssRNA
Moroccan pepper virus	MPV	Tombusvirus	Tombusviridae	+ssRNA
Grapevine Algerian latent virus	GALV	Tombusvirus	Tombusviridae	+ssRNA
Tobacco necrosis virus	TNV	Necrovirus	Tombusviridae	+ssRNA
Carnation mottle virus	CarMV	Carmovirus	Tombusviridae	+ssRNA
Impatiens necrotic spot virus	INSV	Orthotospovirus	Tospoviridae	+/-ssRNA
Tomato spotted wilt virus	TSWV	Orthotospovirus	Tospoviridae	+/-ssRNA
Melon severe mosaic virus	MSMV	Orthotospovirus	Tospoviridae	+/-ssRNA
Melon yellow spot virus	MYSV	Orthotospovirus	Tospoviridae	+/-ssRNA
Watermelon bud necrosis virus	WBNV	Orthotospovirus	Tospoviridae	+/-ssRNA
Watermelon silver mottle virus	WSMoV	Orthotospovirus	Tospoviridae	+/-ssRNA
Zucchini lethal chlorosis virus	ZLCV	Orthotospovirus	Tospoviridae	+/-ssRNA
Groundnut bud necrosis virus	GBNV	Orthotospovirus	Tospoviridae	+/-ssRNA
Groundnut ringspot virus	GRSV	Orthotospovirus	Tospoviridae	+/-ssRNA
Capsicum chlorosis virus	CaCV	Orthotospovirus	Tospoviridae	+/-ssRNA
Mulberry vein banding virus	MuVBV	Orthotospovirus	Tospoviridae	+/-ssRNA
Alstroemeria necrotic streak virus	ANSV	Orthotospovirus	Tospoviridae	+/-ssRNA
Groundnut yellow spot virus	GYSV	Orthotospovirus	Tospoviridae	+/-ssRNA
Pepper chlorotic spot virus	PCSV	Orthotospovirus	Tospoviridae	+/-ssRNA
Pepper necrotic spot virus	PNSV	Orthotospovirus	Tospoviridae	+/-ssRNA
Tomato chlorotic spot virus	TCSV	Orthotospovirus	Tospoviridae	+/-ssRNA
Tomato necrotic ringspot virus	TNRV	Orthotospovirus	Tospoviridae	+/-ssRNA
Tomato yellow ring virus	TYRV	Orthotospovirus	Tospoviridae	+/-ssRNA
Tomato zonate spot virus	TZSV	Orthotospovirus	Tospoviridae	+/-ssRNA
Chrysanthemum stem necrosis virus	CSNV	Orthotospovirus	Tospoviridae	+/-ssRNA
Papaya Meleira virus	PMeV	Unassigned	Totiviridae	dsRNA
Melon rugose mosaic virus	MRMV	Tymovirus	Tymoviridae	+ssRNA
Chayote mosaic virus	ChMV	Tymovirus	Tymoviridae	+ssRNA
Fig fleck-associated virus	FFkaV	Maculavirus	Tymoviridae	+ssRNA
Olive latent virus 3	OLV-3	Marafivirus	Tymoviridae	+ssRNA
Passion fruit yellow mosaic virus	PFYMV	Tymovirus	Tymoviridae	+ssRNA
Peach marafivirus D	PeVD	Marafivirus	Tymoviridae	+ssRNA
Blackberry virus S	BlVS	Marafivirus	Tymoviridae	+ssRNA
Citrus sudden death-associated virus	CSDaV	Marafivirus	Tymoviridae	+ssRNA
Chiltepin yellow mosaic virus	ChiYMV	Tymovirus	Tymoviridae	+ssRNA
Physalis mottle virus	PhyMV	Tymovirus	Tymoviridae	+ssRNA
Eggplant mosaic virus	EMV	Tymovirus	Tymoviridae	+ssRNA
Tomato blistering mosaic virus	ToBMV	Tymovirus	Tymoviridae	+ssRNA
Grapevine asteroid mosaic-associated virus	GAMaV	Marafivirus	Tymoviridae	+ssRNA
Grapevine fleck virus	GFkV	Maculavirus	Tymoviridae	+ssRNA
Grapevine red globe virus	GRGV	Maculavirus	Tymoviridae	+ssRNA
Grapevine Syrah virus 1	GSyV-1	Marafivirus	Tymoviridae	+ssRNA
Grapevine-associated tymo-like virus	GaTLV	Gratylivirus	Tymoviridae	+ssRNA
Raspberry bushy dwarf virus	RBDV	Idaeovirus	Unassigned	+ssRNA
Citrus coguvirus	CCGaV	Coguvirus	Unassigned	-ssRNA
Grapevine Ajinashika virus	GAgV	Unassigned	Unassigned	+ssRNA
Grapevine labile rod-shaped virus	GLRSV	Unassigned	Unassigned	+ssRNA
Grapevine stunt virus	GSV	Unassigned	Unassigned	+ssRNA
Ribgrass mosaic virus	RMV	Tobamovirus	Virgaviridae	+ssRNA
Turnip vein clearing virus	TVCV	Tobamovirus	Virgaviridae	+ssRNA
Opuntia chlorotic ringspot virus	SOV	Tobamovirus	Virgaviridae	+ssRNA
Rattail cactus necrosis-associated virus	RCNaV	Tobamovirus	Virgaviridae	+ssRNA
Tobacco mosaic virus	TMV	Tobamovirus	Virgaviridae	+ssRNA
Cucumber green mottle mosaic virus	CGMMV	Tobamovirus	Virgaviridae	+ssRNA
Kyuri green mottle mosaic virus	KGMMV	Tobamovirus	Virgaviridae	+ssRNA
Cucumber fruit mottle mosaic virus	CFMMV	Tobamovirus	Virgaviridae	+ssRNA
Cucumber mottle virus	CuMoV	Tobamovirus	Virgaviridae	+ssRNA
Tomato mosaic virus	ToMV	Tobamovirus	Virgaviridae	+ssRNA
Tobacco mild green mosaic virus	TMGMV	Tobamovirus	Virgaviridae	+ssRNA
Zucchini green mottle mosaic virus	ZGMMV	Tobamovirus	Virgaviridae	+ssRNA
Tobacco rattle virus	TRV	Tobravirus	Virgaviridae	+ssRNA
Maracuja mosaic virus	MarMV	Tobamovirus	Virgaviridae	+ssRNA
Passion fruit mosaic virus	PafMV	Tobamovirus	Virgaviridae	+ssRNA
Bell pepper mottle virus	BPMoV	Tobamovirus	Virgaviridae	+ssRNA
Obuda pepper virus	ObPV	Tobamovirus	Virgaviridae	+ssRNA
Paprika mild mottle virus	PaMMV	Tobamovirus	Virgaviridae	+ssRNA
Pepper mild mottle virus	PMMoV	Tobamovirus	Virgaviridae	+ssRNA
Pepper ringspot virus	PepRSV	Tobravirus	Virgaviridae	+ssRNA
Rehmannia mosaic virus	RheMV	Tobamovirus	Virgaviridae	+ssRNA
Tomato mottle mosaic virus	ToMMV	Tobamovirus	Virgaviridae	+ssRNA
Youcai mosaic virus	YoMV	Tobamovirus	Virgaviridae	+ssRNA
Tomato brown rugose fruit virus	TBRFV	Tobamovirus	Virgaviridae	+ssRNA
Grapevine virga-like virus	GVLV	Tobamovirus	Virgaviridae	+ssRNA
				*ND=not determined
