# Supplementary material for: Viruses Infecting Trees and Herbs That Produce Edible Fleshy Fruits with a Prominent Value in the Global Market: An Evolutionary Perspective
Source: Plants (Basel). 2022 Jan 13;11(2):203. doi: 10.3390/plants11020203 (PMC8778216; doi:10.3390/plants11020203)
Supplement: Supplementary file 1 [file plants-11-00203-s001.zip › Supplementary Table S4.xlsx]

## Sheet: Viruses infecting EFFs
Supplementary Table 4. Classification of EFFs according to plant divergence times and their viral pathogens
Clade	Magnoliids						Monocots												Eudicots
Order	Laurales			Magnoliales			Arecales			Poales			Zingiberales						Saxifragales												Vitales			Malpighiales			Rosales
Family	Lauraceae			Annonaceae			Arecaceae			Bromeliaceae			Musaceae						Grossulariaceae												Vitaceae			Passifloraceae			Moraceae						Rosaceae
EFFs	Persea americana			Annona muricata			Phoenix dactylifera			Ananas comosus			Musa acuminata			Musa paradisiaca			Ribes nigrum			Ribes rubrum			Ribes sativum			Ribes uva-crispa			Vitis vinifera			Passiflora edulis			Ficus carica			Morus alba			Cydonia oblonga			Fragaria ananassa			Malus domestica
Virus/family/genome	Avocado sunblotch viroid (ASBVd)	Avsunviroidae	ssRNA	Soursop yellow blotch virus (SYBV) (SYBV)	Rhabdoviridae	-ssDNA	Coconut cadang-cadang viroid (CCCVd)	Pospiviroidae	ssRNA	Pineapple mealybug wilt-associated virus 1 (PMWaV-1)	Closteroviridae	+ssRNA	Banana mild mosaic virus (BanMMV)	Betaflexiviridae	+ssRNA	Banana mild mosaic virus (BanMMV)	Betaflexiviridae	+ssRNA	Actinidia virus X (AVX)	Alphaflexiviridae	+ssRNA	Actinidia virus X (AVX)	Alphaflexiviridae	+ssRNA	Actinidia virus X (AVX)	Alphaflexiviridae	+ssRNA	Actinidia virus X (AVX)	Alphaflexiviridae	+ssRNA	Potato virus X (PVX)	Alphaflexiviridae	+ssRNA	Passiflora latent virus (PLV)	Betaflexiviridae	+ssRNA	Fig latent virus 1 (FLV-1)	Betaflexiviridae	+ssRNA	Prunus necrotic ringspot virus (PNRSV)	Bromoviridae	+ssRNA	Apple chlorotic leaf spot virus (ACLSV)	Betaflexiviridae	+ssRNA	Strawberry mild yellow edge virus (SMYEV)	Alphaflexiviridae	+ssRNA	Peach latent mosaic viroid (PLMVd)
Virus/family/genome	Persea americana alphaendornavirus 1 (PaEV 1)	Endornaviridae	dsRNA							Pineapple mealybug wilt-associated virus 2 (PMWaV-2)	Closteroviridae	+ssRNA	Banana virus X (BanVX)	Betaflexiviridae	+ssRNA	Banana virus X (BanVX)	Betaflexiviridae	+ssRNA	Currant virus A (CuVA)	Betaflexiviridae	+ssRNA	Currant virus A (CuVA)	Betaflexiviridae	+ssRNA	Currant virus A (CuVA)	Betaflexiviridae	+ssRNA	Currant virus A (CuVA)	Betaflexiviridae	+ssRNA	Grapevine Kizil Sapak virus (GKSV)	Betaflexiviridae	+ssRNA	Cucumber mosaic virus (CMV)	Bromoviridae	+ssRNA	Fig badnavirus 1 (FBV-1)	Caulimoviridae	dsDNA-RT	Mulberry badnavirus 1 (MBV-1)	Caulimoviridae	dsDNA-RT	Apple stem grooving virus (ASGV)	Betaflexiviridae	+ssRNA	Strawberry pseudo mild yellow edge virus (SPMYEV)	Betaflexiviridae	+ssRNA	Apple chlorotic leaf spot virus (ACLSV)
Virus/family/genome	Potato spindle tuber viroid (PSTVd)	Pospiviroidae	ssRNA							Pineapple mealybug wilt-associated virus 3 (PMWaV-3)	Closteroviridae	+ssRNA	Cucumber mosaic virus (CMV)	Bromoviridae	+ssRNA	Cucumber mosaic virus (CMV)	Bromoviridae	+ssRNA	Alfalfa mosaic virus (AMV)	Bromoviridae	+ssRNA	Alfalfa mosaic virus (AMV)	Bromoviridae	+ssRNA	Alfalfa mosaic virus (AMV)	Bromoviridae	+ssRNA	Alfalfa mosaic virus (AMV)	Bromoviridae	+ssRNA	Grapevine virus A (GVA)	Betaflexiviridae	+ssRNA	Euphorbia leaf curl virus (EuLCuV)	Geminiviridae	ssDNA	Fig leaf mottle-associated virus 1 (FLMaV-1)	Closteroviridae	+ssRNA	Indian cassava mosaic virus (ICMV)	Geminiviridae	ssDNA	Apple stem pitting virus (ASPV)	Betaflexiviridae	+ssRNA	Apple mosaic virus (ApMV)	Bromoviridae	+ssRNA	Apple stem grooving virus (ASGV)
Virus/family/genome										Pineapple mealybug wilt-associated virus 4 (PMWaV-4)	Closteroviridae	+ssRNA	Banana streak GF virus (BSGFV)	Caulimoviridae	dsDNA-RT	Banana streak GF virus (BSGFV)	Caulimoviridae	dsDNA-RT	Cucumber mosaic virus (CMV)	Bromoviridae	+ssRNA	Cucumber mosaic virus (CMV)	Bromoviridae	+ssRNA	Cucumber mosaic virus (CMV)	Bromoviridae	+ssRNA	Cucumber mosaic virus (CMV)	Bromoviridae	+ssRNA	Grapevine virus B (GVB)	Betaflexiviridae	+ssRNA	Papaya leaf curl Guandong virus (PaLCuGdV)	Geminiviridae	ssDNA	Fig leaf mottle-associated virus 2 (FLMaV-2)	Closteroviridae	+ssRNA	Mulberry mosaic dwarf associated virus (MMDaV)	Geminiviridae	ssDNA	Apple mosaic virus (ApMV)	Bromoviridae	+ssRNA	Cucumber mosaic virus (CMV)	Bromoviridae	+ssRNA	Apple stem pitting virus (ASPV)
Virus/family/genome										Pineapple mealybug wilt-associated virus 5 (PMWaV-5)	Closteroviridae	+ssRNA	Banana streak IM virus (BSIMV)	Caulimoviridae	dsDNA-RT	Banana streak IM virus (BSIMV)	Caulimoviridae	dsDNA-RT	Gooseberry vein banding associated virus (GVBAV)	Caulimoviridae	dsDNA-RT	Gooseberry vein banding associated virus (GVBAV)	Caulimoviridae	dsDNA-RT	Gooseberry vein banding associated virus (GVBAV)	Caulimoviridae	dsDNA-RT	Gooseberry vein banding associated virus (GVBAV)	Caulimoviridae	dsDNA-RT	Grapevine virus D (GVD)	Betaflexiviridae	+ssRNA	Passionfruit leaf distortion virus (PLDV)	Geminiviridae	ssDNA	Fig mild mottle-associated virus (FMMaV)	Closteroviridae	+ssRNA	Hop stunt viroid (HpSVD)	Pospiviroidae	ssRNA	Pear blister canker viroid (PBCVd)	Pospiviroidae	ssRNA	Fragaria chiloensis latent virus (FCILV)	Bromoviridae	+ssRNA	Apple mosaic virus (ApMV)
Virus/family/genome										Pineapple bacilliform CO virus (PBCOV)	Caulimoviridae	dsDNA-RT	Banana streak MY virus (BSMYV)	Caulimoviridae	dsDNA-RT	Banana streak MY virus (BSMYV)	Caulimoviridae	dsDNA-RT	Arabis mosaic virus (ArMV)	Secoviridae	+ssRNA	Arabis mosaic virus (ArMV)	Secoviridae	+ssRNA	Arabis mosaic virus (ArMV)	Secoviridae	+ssRNA	Arabis mosaic virus (ArMV)	Secoviridae	+ssRNA	Grapevine berry inner necrosis virus (GINV)	Betaflexiviridae	+ssRNA	Passionfruit severe leaf distortion virus (PSLDV)	Geminiviridae	ssDNA	Fig mosaic emaravirus (FMV)	Fimoviridae	-ssDNA	Mulberry mosaic leaf roll associated virus (MMLRaV)	Secoviridae	+ssRNA				Strawberry necrotic shock virus (SNSV)	Bromoviridae	+ssRNA	Cucumber mosaic virus (CMV)
Virus/family/genome										Pineapple bacilliform ER virus (PBERV)	Caulimoviridae	dsDNA-RT	Banana streak OL virus (BSOLV)	Caulimoviridae	dsDNA-RT	Banana streak OL virus (BSOLV)	Caulimoviridae	dsDNA-RT	Blackcurrant reversion virus (BRV)	Secoviridae	+ssRNA	Blackcurrant reversion virus (BRV)	Secoviridae	+ssRNA	Blackcurrant reversion virus (BRV)	Secoviridae	+ssRNA	Blackcurrant reversion virus (BRV)	Secoviridae	+ssRNA	Grapevine Pinot gris virus (GPGV)	Betaflexiviridae	+ssRNA	Passion fruit green spot virus (PFGSV)	Kitaviridae	+ssRNA	Fig cryptic virus (FCV)	Partitiviridae	dsRNA	Mulberry ringspot virus (MRSV)	Secoviridae	+ssRNA				Tobacco streak virus (TSV)	Bromoviridae	+ssRNA	Prunus necrotic ringspot virus (PNRSV)
Virus/family/genome										Endogenous pineapple pararetrovirus 1 (EPPV1)	Caulimoviridae	dsDNA-RT	Banana streak UA virus (BSUAV)	Caulimoviridae	dsDNA-RT	Banana streak UA virus (BSUAV)	Caulimoviridae	dsDNA-RT	Blackcurrant waikavirus A (BCWVA)	Secoviridae	+ssRNA	Blackcurrant waikavirus A (BCWVA)	Secoviridae	+ssRNA	Blackcurrant waikavirus A (BCWVA)	Secoviridae	+ssRNA	Blackcurrant waikavirus A (BCWVA)	Secoviridae	+ssRNA	Grapevine rupestris stem pitting-associated virus (GRSPaV)	Betaflexiviridae	+ssRNA	Cowpea aphid-borne mosaic virus (CABMV)	Potyviridae	+ssRNA	Apple dimple fruit viroid (ADFVd)	Pospiviroidae	ssRNA	Mulberry vein banding virus (MuVBV)	Tospoviridae	+/-ssRNA				Strawberry vein banding virus (SVBV)	Caulimoviridae	dsDNA-RT	Tulare apple mosaic virus (TAMV)
Virus/family/genome										Pineapple chlorotic leaf streak virus (PCLSV)	Rhabdoviridae	-ssDNA	Banana streak UI virus (BSUIV)	Caulimoviridae	dsDNA-RT	Banana streak UI virus (BSUIV)	Caulimoviridae	dsDNA-RT	Currant latent virus (CuLV)	Secoviridae	+ssRNA	Currant latent virus (CuLV)	Secoviridae	+ssRNA	Currant latent virus (CuLV)	Secoviridae	+ssRNA	Currant latent virus (CuLV)	Secoviridae	+ssRNA	Grapevine virus E (GVE)	Betaflexiviridae	+ssRNA	East Asian passiflora virus (EAPV)	Potyviridae	+ssRNA	Citrus exocortis viroid (CEVd)	Pospiviroidae	ssRNA							Beet pseudoyellows virus (BPYV)	Closteroviridae	+ssRNA	Apple dimple fruit viroid (ADFVd)
Virus/family/genome										Tomato spotted wilt virus (TSWV)	Tospoviridae	+/-ssRNA	Banana streak UL virus (BSULV)	Caulimoviridae	dsDNA-RT	Banana streak UL virus (BSULV)	Caulimoviridae	dsDNA-RT	Raspberry ringspot virus (RpRSV)	Secoviridae	+ssRNA	Raspberry ringspot virus (RpRSV)	Secoviridae	+ssRNA	Raspberry ringspot virus (RpRSV)	Secoviridae	+ssRNA	Raspberry ringspot virus (RpRSV)	Secoviridae	+ssRNA	Grapevine virus F (GVF)	Betaflexiviridae	+ssRNA	Passion fruit woodiness virus (PWV)	Potyviridae	+ssRNA	Hop stunt viroid (HpSVD)	Pospiviroidae	ssRNA							Strawberry chlorotic fleck-associated virus (SCFaV)	Closteroviridae	+ssRNA	Apple fruit crinkle viroid (AFCVd)
Virus/family/genome													Banana streak UM virus (BSUMV)	Caulimoviridae	dsDNA-RT	Banana streak UM virus (BSUMV)	Caulimoviridae	dsDNA-RT	Strawberry latent ringspot virus (SLRSV)	Secoviridae	+ssRNA	Strawberry latent ringspot virus (SLRSV)	Secoviridae	+ssRNA	Strawberry latent ringspot virus (SLRSV)	Secoviridae	+ssRNA	Strawberry latent ringspot virus (SLRSV)	Secoviridae	+ssRNA	Grapevine virus G (GVG)	Betaflexiviridae	+ssRNA	Soybean mosaic virus (SMV)	Potyviridae	+ssRNA	Fig fleck-associated virus (FFkaV)	Tymoviridae	+ssRNA							Strawberry pallidosis-associated virus (SPaV)	Closteroviridae	+ssRNA	Apple scar skin viroid (ASSVd)
Virus/family/genome													Banana streak VN virus (BSVNV)	Caulimoviridae	dsDNA-RT	Banana streak VN virus (BSVNV)	Caulimoviridae	dsDNA-RT	Tomato black ring virus (TBRV)	Secoviridae	+ssRNA	Tomato black ring virus (TBRV)	Secoviridae	+ssRNA	Tomato black ring virus (TBRV)	Secoviridae	+ssRNA	Tomato black ring virus (TBRV)	Secoviridae	+ssRNA	Grapevine virus H (GVH)	Betaflexiviridae	+ssRNA	Telosma mosaic virus (TelMV)	Potyviridae	+ssRNA										Fragaria chiloensis cryptic virus (FCCV)	Partitiviridae	dsRNA	Hop stunt viroid (HpSVD)
Virus/family/genome													Banana streak virus (BSV)	Caulimoviridae	dsDNA-RT	Banana streak virus (BSV)	Caulimoviridae	dsDNA-RT	Tomato ringspot virus (ToRSV)	Secoviridae	+ssRNA	Tomato ringspot virus (ToRSV)	Secoviridae	+ssRNA	Tomato ringspot virus (ToRSV)	Secoviridae	+ssRNA	Tomato ringspot virus (ToRSV)	Secoviridae	+ssRNA	Grapevine virus I (GVI)	Betaflexiviridae	+ssRNA	Ugandan passiflora virus (UPV)	Potyviridae	+ssRNA										Strawberry crinkle virus (SCV)	Rhabdoviridae	-ssDNA	Pear blister canker viroid (PBCVd)
Virus/family/genome													Banana bunchy top virus (BBTV)	Nanoviridae	ssDNA	Banana bunchy top virus (BBTV)	Nanoviridae	ssDNA	Tobacco rattle virus (TRV)	Virgaviridae	+ssRNA	Tobacco rattle virus (TRV)	Virgaviridae	+ssRNA	Tobacco rattle virus (TRV)	Virgaviridae	+ssRNA	Tobacco rattle virus (TRV)	Virgaviridae	+ssRNA	Grapevine virus J (GVJ)	Betaflexiviridae	+ssRNA	Watermelon mosaic virus (WMV)	Potyviridae	+ssRNA										Strawberry latent C virus (SLCV)	Rhabdoviridae	-ssDNA	Apple latent spherical virus (ALSV)
Virus/family/genome													Abaca bunchy top virus (ABTV)	Nanoviridae	ssDNA	Abaca bunchy top virus (ABTV)	Nanoviridae	ssDNA													Grapevine virus K (GVK)	Betaflexiviridae	+ssRNA	Tomato ringspot virus (ToRSV)	Secoviridae	+ssRNA										Arabis mosaic virus (ArMV)	Secoviridae	+ssRNA	Cherry leaf roll virus (CLRV)
Virus/family/genome													Banana bract mosaic virus (BBrMV)	Potyviridae	+ssRNA	Banana bract mosaic virus (BBrMV)	Potyviridae	+ssRNA													Grapevine virus L (GVL)	Betaflexiviridae	+ssRNA	Passion fruit yellow mosaic virus (PFYMV)	Tymoviridae	+ssRNA										Raspberry ringspot virus (RpRSV)	Secoviridae	+ssRNA	Cherry rasp leaf virus (CRLV)
Virus/family/genome													Sugarcane mosaic virus (SCMV)	Potyviridae	+ssRNA	Sugarcane mosaic virus (SCMV)	Potyviridae	+ssRNA													Grapevine virus M (GVM)	Betaflexiviridae	+ssRNA	Maracuja mosaic virus (MarMV)	Virgaviridae	+ssRNA										Strawberry latent ringspot virus (SLRSV)	Secoviridae	+ssRNA	Tobacco ringspot virus (TRSV)
Virus/family/genome																															Grapevine virus T (GVT)	Betaflexiviridae	+ssRNA	Passion fruit mosaic virus (PafMV)	Virgaviridae	+ssRNA										Strawberry mottle virus (SMoV)	Secoviridae	+ssRNA	Tomato ringspot virus (ToRSV)
Virus/family/genome																															Alfalfa mosaic virus (AMV) (AMV)	Bromoviridae	+ssRNA													Tomato black ring virus (TBRV)	Secoviridae	+ssRNA	Tomato bushy stunt virus (TBSV)
Virus/family/genome																															Cucumber mosaic virus (CMV)	Bromoviridae	+ssRNA													Tomato ringspot virus (ToRSV)	Secoviridae	+ssRNA	Tobacco mosaic virus (TMV)
Virus/family/genome																															Amazon lily mild mottle virus (ALiMMV)	Bromoviridae	+ssRNA													Tobacco necrosis virus D (TNV-D)	Tombusviridae	+ssRNA
Virus/family/genome																															Grapevine angular mosaic virus (GaMoV)	Bromoviridae	+ssRNA													Tobacco mosaic virus (TMV)	Virgaviridae	+ssRNA
Virus/family/genome																															Grapevine line pattern virus (GLPV)	Bromoviridae	+ssRNA
Virus/family/genome																															Grapevine virus S (GVS)	Bromoviridae	+ssRNA
Virus/family/genome																															Tomato spotted wilt virus (TSWV)	Bunyaviridae	+/-ssRNA
Virus/family/genome																															Grapevine roditis leaf discoloration-associated virus (GRLDaV)	Caulimoviridae	dsDNA-RT
Virus/family/genome																															Grapevine badnavirus 1 (GBV1)	Caulimoviridae	dsDNA-RT
Virus/family/genome																															Grapevine vein clearing virus (GVCV)	Caulimoviridae	dsDNA-RT
Virus/family/genome																															Grapevine leafroll-associated virus 1 (GLRaV-1)	Closteroviridae	+ssRNA
Virus/family/genome																															Grapevine leafroll-associated virus 2 (GLRaV-2)	Closteroviridae	+ssRNA
Virus/family/genome																															Grapevine leafroll-associated virus 3 (GLRaV-3)	Closteroviridae	+ssRNA
Virus/family/genome																															Grapevine leafroll-associated virus 4 (GLRaV-4)	Closteroviridae	+ssRNA
Virus/family/genome																															Grapevine leafroll-associated virus 7 (GLRaV-7)	Closteroviridae	+ssRNA
Virus/family/genome																															Grapevine leafroll-associated virus 9 (GLRaV-9)	Closteroviridae	+ssRNA
Virus/family/genome																															Grapevine leafroll-associated virus 13 (GLRaV-13)	Closteroviridae	+ssRNA
Virus/family/genome																															Grapevine endophyte alphaendornavirus (GEEV)	Endornaviridae	dsRNA
Virus/family/genome																															Grapevine red blotch virus (GRBV)	Geminiviridae	ssDNA
Virus/family/genome																															Grapevine begomovirus A (GBVA)	Geminiviridae	ssDNA
Virus/family/genome																															Wild Vitis latent virus 1 (WVV1)	Geminiviridae	ssDNA
Virus/family/genome																															Grapevine geminivirus A (GGVA)	Geminiviridae	ssDNA
Virus/family/genome																															Temperate fruit-decay-associated virus (TFDaV)	Geminiviridae	ssDNA
Virus/family/genome																															Grapevine enamovirus 1 (GEV-1)	Luteoviridae	+ssRNA
Virus/family/genome																															Grapevine cryptic virus (GCV)	Partitiviridae	dsRNA
Virus/family/genome																															Grapevine Garan dmak virus (GGDV)	Phenuiviridae	-ssRNA
Virus/family/genome																															Grapevine Muscat rose virus (GMRV)	Phenuiviridae	-ssRNA
Virus/family/genome																															Australian grapevine viroid (AGVd)	Pospiviroidae	ssRNA
Virus/family/genome																															Citrus bent leaf viroid (CBLVd)	Pospiviroidae	ssRNA
Virus/family/genome																															Citrus exocortis viroid (CEVd)	Pospiviroidae	ssRNA
Virus/family/genome																															Grapevine yellow speckle viroid 1 (GYSVd-1)	Pospiviroidae	ssRNA
Virus/family/genome																															Grapevine yellow speckle viroid 2 (GYSVd-2)	Pospiviroidae	ssRNA
Virus/family/genome																															Hop stunt viroid (HpSVD)	Pospiviroidae	ssRNA
Virus/family/genome																															Potato spindle tuber viroid (PSTVd)	Pospiviroidae	ssRNA
Virus/family/genome																															Bean common mosaic virus (BCMV)	Potyviridae	+ssRNA
Virus/family/genome																															Potato virus Y (PVY)	Potyviridae	+ssRNA
Virus/family/genome																															Grapevine Cabernet Sauvignon reovirus (GCSV)	Reoviridae	dsRNA
Virus/family/genome																															Grapevine fanleaf virus (GFLV)	Secoviridae	+ssRNA
Virus/family/genome																															Apple latent spherical virus (ALSV)	Secoviridae	+ssRNA
Virus/family/genome																															Arabis mosaic virus (ArMV)	Secoviridae	+ssRNA
Virus/family/genome																															Artichoke Italian latent virus (AILV)	Secoviridae	+ssRNA
Virus/family/genome																															Blueberry leaf mottle virus (BLMoV)	Secoviridae	+ssRNA
Virus/family/genome																															Broad bean wilt virus (BBWV)	Secoviridae	+ssRNA
Virus/family/genome																															Cherry leaf roll virus (CLRV)	Secoviridae	+ssRNA
Virus/family/genome																															Grapevine Anatolian ringspot virus (GARSV)	Secoviridae	+ssRNA
Virus/family/genome																															Grapevine Bulgarian latent virus (GBLV)	Secoviridae	+ssRNA
Virus/family/genome																															Grapevine chrome mosaic virus (GCMV)	Secoviridae	+ssRNA
Virus/family/genome																															Grapevine deformation virus (GDefV)	Secoviridae	+ssRNA
Virus/family/genome																															Grapevine fanleaf virus (GFLV)	Secoviridae	+ssRNA
Virus/family/genome																															Grapevine Tunisian ringspot virus (GTRSV)	Secoviridae	+ssRNA
Virus/family/genome																															Peach rosette mosaic virus (PRMV)	Secoviridae	+ssRNA
Virus/family/genome																															Raspberry ringspot virus (RpRSV)	Secoviridae	+ssRNA
Virus/family/genome																															Strawberry latent ringspot virus (SLRSV)	Secoviridae	+ssRNA
Virus/family/genome																															Tobacco ringspot virus (TRSV)	Secoviridae	+ssRNA
Virus/family/genome																															Tomato black ring virus (TBRV)	Secoviridae	+ssRNA
Virus/family/genome																															Tomato ringspot virus (ToRSV)	Secoviridae	+ssRNA
Virus/family/genome																															Sowbane mosaic virus (SoMV)	Solemoviridae	+ssRNA
Virus/family/genome																															Carnation mottle virus (CarMV)	Tombusviridae	+ssRNA
Virus/family/genome																															Petunia asteroid mosaic virus (PAMV)	Tombusviridae	+ssRNA
Virus/family/genome																															Grapevine Algerian latent virus (GALV)	Tombusviridae	+ssRNA
Virus/family/genome																															Tobacco necrosis virus (TNV)	Tombusviridae	+ssRNA
Virus/family/genome																															Tomato bushy stunt virus (TBSV)	Tombusviridae	+ssRNA
Virus/family/genome																															Grapevine asteroid mosaic-associated virus (GAMaV)	Tymoviridae	+ssRNA
Virus/family/genome																															Grapevine fleck virus (GFkV)	Tymoviridae	+ssRNA
Virus/family/genome																															Grapevine red globe virus (GRGV)	Tymoviridae	+ssRNA
Virus/family/genome																															Grapevine Syrah virus 1 (GSyV-1)	Tymoviridae	+ssRNA
Virus/family/genome																															Blackberry virus S (BlVS)	Tymoviridae	+ssRNA
Virus/family/genome																															Grapevine-associated tymo-like virus (GaTLV)	Tymoviridae	+ssRNA
Virus/family/genome																															Raspberry bushy dwarf virus (RBDV)	Unassigned	+ssRNA
Virus/family/genome																															Sowbane mosaic virus (SoMV)	Unassigned	+ssRNA
Virus/family/genome																															Grapevine Ajinashika virus (GAgV)	Unassigned	+ssRNA
Virus/family/genome																															Grapevine labile rod-shaped virus (GLRSV)	Unassigned	+ssRNA
Virus/family/genome																															Grapevine stunt virus (GSV)	Unassigned	+ssRNA
Virus/family/genome																															Tobacco mosaic virus (TMV)	Virgaviridae	+ssRNA
Virus/family/genome																															Grapevine virga-like virus (GVLV)	Virgaviridae	+ssRNA
Virus/family/genome																															Tomato mosaic virus (ToMV)	Virgaviridae	+ssRNA
Virus/family/genome
Virus/family/genome
Virus/family/genome
Virus/family/genome
Virus/family/genome
Virus/family/genome
Virus/family/genome
Virus/family/genome
Virus/family/genome
Virus/family/genome
Virus/family/genome
Virus/family/genome
Virus/family/genome
Virus/family/genome
Virus/family/genome
Virus/family/genome
Virus/family/genome
Virus/family/genome
Virus/family/genome
Virus/family/genome
Virus/family/genome
Virus/family/genome
Virus/family/genome
Virus/family/genome
Virus/family/genome
Virus/family/genome
Virus/family/genome
Virus/family/genome
Virus/family/genome
Virus/family/genome
Virus/family/genome
Virus/family/genome
Virus/family/genome
Virus/family/genome
Virus/family/genome
Virus/family/genome
Virus/family/genome
Virus/family/genome
Virus/family/genome
Virus/family/genome
Virus/family/genome
Virus/family/genome
Virus/family/genome
Virus/family/genome
Virus/family/genome
Virus/family/genome
Virus/family/genome
Virus/family/genome
Virus/family/genome
Virus/family/genome
Virus/family/genome
Virus/family/genome
Virus/family/genome
Virus/family/genome
Virus/family/genome
Virus/family/genome
Virus/family/genome
Virus/family/genome
Virus/family/genome
Virus/family/genome
Virus/family/genome
Virus/family/genome
Virus/family/genome
Virus/family/genome
Virus/family/genome
Virus/family/genome
Virus/family/genome
Virus/family/genome
Virus/family/genome
Virus/family/genome
Virus/family/genome
Virus/family/genome
Virus/family/genome
Virus/family/genome
Virus/family/genome
Virus/family/genome
Virus/family/genome
Virus/family/genome
Virus/family/genome
Virus/family/genome
Virus/family/genome
Virus/family/genome
Virus/family/genome
Virus/family/genome
Virus/family/genome
Virus/family/genome
Virus/family/genome
Virus/family/genome
Virus/family/genome
Virus/family/genome
Virus/family/genome
Virus/family/genome
Virus/family/genome
Virus/family/genome
Virus/family/genome
Virus/family/genome
Virus/family/genome
Virus/family/genome
Virus/family/genome
Virus/family/genome
Virus/family/genome
Virus/family/genome
Virus/family/genome
Virus/family/genome
Virus/family/genome
Virus/family/genome
Virus/family/genome
Virus/family/genome
Virus/family/genome
Virus/family/genome
Virus/family/genome
Virus/family/genome
Virus/family/genome
[truncated: 143 more columns]
